# Supplementary material for: Internal brace augmentation reconstruction versus standard anterior cruciate ligament reconstruction: a randomised controlled clinical trial study protocol
Source: PubMed Central journal article supplement — BMJ Open. 2023 Dec 19;13(12):e065254. doi: 10.1136/bmjopen-2022-065254 (PMC10749018; doi:10.1136/bmjopen-2022-065254), 2023-12-19
Supplement: bmjopen-2022-065254.draft_revisions.pdf [file bmjopen-2022-065254.draft_revisions.pdf]

# BMJ Open

BMJ Open is committed to open peer review. As part of this commitment we make the peer review history of every article we publish publicly available.

When an article is published we post the peer reviewers' comments and the authors' responses online. We also post the versions of the paper that were used during peer review. These are the versions that the peer review comments apply to.

The versions of the paper that follow are the versions that were submitted during the peer review process. They are not the versions of record or the final published versions. They should not be cited or distributed as the published version of this manuscript.

BMJ Open is an open access journal and the full, final, typeset and author-corrected version of record of the manuscript is available on our site with no access controls, subscription charges or pay-per-view fees (<http://bmjopen.bmj.com>).

If you have any questions on BMJ Open's open peer review process please email [info.bmjopen@bmj.com](mailto:info.bmjopen@bmj.com)

# BMJ Open

## Internal brace augmentation reconstruction VS standard anterior cruciate ligament reconstruction:A randomized controlled clinical trial study protocol.

|                               |                                                                                                                                                                                                                                                                                                                                                                                                                                                                                                                                                                                                                                                                                                                                                                                                                                               |
|-------------------------------|-----------------------------------------------------------------------------------------------------------------------------------------------------------------------------------------------------------------------------------------------------------------------------------------------------------------------------------------------------------------------------------------------------------------------------------------------------------------------------------------------------------------------------------------------------------------------------------------------------------------------------------------------------------------------------------------------------------------------------------------------------------------------------------------------------------------------------------------------|
| Journal:                      | <i>BMJ Open</i>                                                                                                                                                                                                                                                                                                                                                                                                                                                                                                                                                                                                                                                                                                                                                                                                                               |
| Manuscript ID                 | bmjopen-2022-065254                                                                                                                                                                                                                                                                                                                                                                                                                                                                                                                                                                                                                                                                                                                                                                                                                           |
| Article Type:                 | Protocol                                                                                                                                                                                                                                                                                                                                                                                                                                                                                                                                                                                                                                                                                                                                                                                                                                      |
| Date Submitted by the Author: | 01-Jun-2022                                                                                                                                                                                                                                                                                                                                                                                                                                                                                                                                                                                                                                                                                                                                                                                                                                   |
| Complete List of Authors:     | Lu, Wenhao; Xiangya Hospital Central South University, Department of Orthopaedics<br>Liu, Di; Xiangya Hospital Central South University, Department of Orthopaedics<br>Cai, Zijun; Xiangya Hospital Central South University, Department of Orthopedics<br>Pan, Linyuan; Xiangya Hospital Central South University, Department of Orthopedics<br>Xie, Wenqing; Xiangya Hospital Central South University, Department of Orthopedics<br>Jin, Hongfu; Xiangya Hospital Central South University, Department of Orthopaedics<br>Liu, Xu; Xiangya Hospital Central South University, Department of Orthopaedics<br>Li, Yusheng; Xiangya Hospital Central South University, Department of Orthopaedics; Central South University<br>Xiao, Wenfeng; Xiangya Hospital Central South University, Department of Orthopaedics; Central South University |
| Keywords:                     | Knee < ORTHOPAEDIC & TRAUMA SURGERY, Orthopaedic sports trauma < ORTHOPAEDIC & TRAUMA SURGERY, Orthopaedic & trauma surgery < SURGERY, Clinical trials < THERAPEUTICS                                                                                                                                                                                                                                                                                                                                                                                                                                                                                                                                                                                                                                                                         |
|                               |                                                                                                                                                                                                                                                                                                                                                                                                                                                                                                                                                                                                                                                                                                                                                                                                                                               |

SCHOLARONE™  
Manuscripts

1  
2  
3  
4 1 **Internal brace augmentation reconstruction VS**  
5  
6 2 **standard anterior cruciate ligament reconstruction :**  
7  
8 3 **A randomized controlled clinical trial study protocol.**  
9  
10 4  
11 5  
12 6

13 7 Wenhao Lu<sup>1,2</sup>, Di Liu<sup>1,2</sup>, Zijun Cai<sup>1,2</sup>, Linyuan Pan<sup>1,2</sup>, Wenqing Xie<sup>1,2</sup>, Hongfu Jin<sup>1,2</sup>,  
14 8 Xu Liu<sup>1,2</sup>, Yusheng Li<sup>1,2,\*</sup>, Wenfeng Xiao<sup>1,2,\*</sup>.  
15 9

16 10 <sup>1</sup> Department of Orthopaedics, Xiangya Hospital, Central South University, Changsha  
17 11 410008, Hunan, China.

18 12 <sup>2</sup> National Clinical Research Center for Geriatric Disorders, Xiangya Hospital, Central  
19 13 South University, Changsha 410008, Hunan, China.  
20 14

21 15 \* Correspondence to:

22 16 Dr. Wenfeng Xiao, Department of Orthopaedics, Xiangya Hospital, Central South  
23 17 University, 87 Xiangya Road, Changsha 410008, Hunan, China. (E-Mail:  
24 18 xiaowenfeng@csu.edu.cn); Dr. Yusheng Li, Department of Orthopaedics, Xiangya  
25 19 Hospital, Central South University, 87 Xiangya Road, Changsha 410008, Hunan,  
26 20 China. (E-Mail: [liyusheng@csu.edu.cn](mailto:liyusheng@csu.edu.cn)).  
27 21  
28 22  
29 23  
30 24  
31 25  
32 26  
33 27  
34 28  
35 29  
36 30  
37 31  
38 32  
39 33  
40 34  
41 35  
42 36  
43 37  
44 38  
45 39  
46 40  
47 41  
48 42  
49 43  
50 44  
51 45  
52 46  
53  
54  
55  
56  
57  
58  
59  
60

## Abstract:

**Introduction:** Anterior cruciate ligament (ACL) rupture is one of the most common knee injuries in sports, and the gold standard for treating ACL rupture is tendon graft reconstruction. Recently, internal brace technology has been gradually applied to ligament repair, but there is still a lack of relevant in vivo clinical evidence for the use of internal brace technology in ACL reconstruction. We conducted a randomized controlled trial to investigate the clinical efficacy of internal brace technology in ACL reconstruction.

**Methods and analysis:** This is a randomized, parallel controlled trial of patients with ACL rupture who underwent inpatient surgery at the Department of Orthopedics, Xiangya Hospital, Central South University. All study subjects were assigned to the test and control groups according to the random number table method. The test group underwent ACL reconstruction using the internal brace technique, and the control group underwent standard ACL reconstruction, with uniform postoperative rehabilitation in both groups. Patient-reported outcomes were preoperative baseline and postoperative recovery at 1, 3, 6, 12, and 24 months. The primary outcome was International Knee Documentation Committee (IKDC) function from baseline (ACL rupture) to 6 months postoperatively. Secondary outcomes included (I) other patient outcome reporting metrics, the Lysholm knee score (LKS), the Knee Injury and Osteoarthritis Outcome Score (KOOS), and the Visual Analog Scale (VAS), (II) the use of the Kneelax3 knee stabilizer to assess knee stability, (III) the occurrence of adverse events, such as graft refraction or symptomatic instability, postoperative infection, and contralateral injury, and (IV) magnetic resonance images at 12 and 24 months after ACL reconstruction.

**Ethics and dissemination:** This trial was approved by the Medical Ethics Committee of Xiangya Hospital of Central South University on October 26, 2021. Data will be published in peer-reviewed journals and presented at national and international conferences.

**Trial registration number:** ChiCTR2200057526.

### **Strengths and limitations of this study:**

- Internal Brace augmentation reconstruction is the standard ACL reconstruction with Internal Brace technology.
- Randomization divided the included patients into Internal Brace augmentation reconstruction group and standard ACL reconstruction group.
- Prospective follow-up and data collection to comparatively analyze the need for enhanced reconstruction of Internal Brace.
- The study has a standard and detailed rehabilitation training program.
- This trial was conducted in a single center and the data lacked generalizability.

### **Key words:**

anterior cruciate ligament (ACL), anterior cruciate ligament reconstruction, internal brace, study protocol.

95

## 96 Introduction

97 Anterior cruciate ligament (ACL) rupture is one of the most common ligament injuries  
98 in the knee, mainly in young people who participate in sports. If not actively treated  
99 after injury, joint instability and other phenomena often occur, which will reduce the  
100 quality of life and increase the risk of osteoarthritis<sup>(1-3)</sup>. Over the past few decades, the  
101 incidence of ACL ruptures has been estimated at approximately 30 to 52 cases per  
102 100,000 person-years(4). ACL injuries occur in more than 175,000 people in the United  
103 States each year, and approximately 100,000 of those people undergo surgery(5-7). A  
104 41-year-old miner successfully performed the world's first ACL repair surgery, and the  
105 function of the knee joint was very good after surgery(8). With the continuous  
106 development of surgical techniques, the current mainstream surgical method is to  
107 perform ACL reconstruction under arthroscopy(9). In recent years, a Japanese study  
108 found that for rugby players under the age of 20 after ACL reconstruction, the  
109 redisruption rate of ACL reconstruction grafts after returning to the field was 23%(10).  
110 At the same time, other studies have also shown that the revision rate of ACL  
111 reconstruction with allogeneic tendon in adolescents can reach 35%(11); however, the  
112 effect after revision is not as good as that of primary ACL reconstruction(12).

113  
114 Internal brace technology was promoted in 2010, which uses braided ultrahigh  
115 molecular weight polyethylene (UHMWPE) polyester suture tape and knotless bone  
116 anchors to reinforce ligament strength, also known as an auxiliary stabilizing structure  
117 for recovery of motion after ligament repair, which helps prevent secondary damage,  
118 (13)such as anterior and posterior cruciate ligament, medial and lateral collateral  
119 ligament repair of the knee(13-15), and ankle and elbow ligament strengthening  
120 repair(16, 17). Enhanced collateral ligament repair and reconstruction with internal  
121 brace improves limb biomechanics, including greater stiffness and maximum load,  
122 while facilitating early rehabilitation in the motor and biomechanical environment (12,  
123 14). Reinforced ligament repair offers unique advantages over traditional  
124 reconstruction techniques, including smaller bores and implants, no risk of disease  
125 transmission from allografts, and no risk of tunnel convergence during the procedure  
126 (14, 18, 19). Therefore, ACL reinforcement is an alternative method for supporting  
127 ACL grafts in a synergistic load-sharing manner with primary tension on the graft and  
128 high-strength suture tape.

129  
130 In the case of ACL reconstruction, the internal brace ligament augmentation technique  
131 helps prevent a variety of failure scenarios, including creep and irreversible stretching,  
132 traumatic tears, and slippage of the tendon-bone interface(20, 21). In addition, these  
133 failures can be avoided when the graft is small or vulnerable(20, 21). In 2018, in an in  
134 vitro trial, Dr. Pat Smith found that ACL reconstruction combined with independent  
135 suture tape significantly reduced graft elongation and allowed the grafted ligaments to  
136 accept higher ultimate disruption loads, thereby reducing the risk of rerupture of the  
137 graft(20). Preliminary short-term studies have shown that the use of the internal brace  
138 technique can significantly improve functional recovery after ACL reconstruction and  
139 improve patient quality of life, but there are only a few medical institutions that use  
140 ACL reconstruction combined with the internal brace technique, and there is a lack of  
141 relevant in vivo clinical evidence.

142  
143 This study will fill this gap by exploring whether internal brace technology can improve

1  
2  
3 144 the outcome of patients with ligament injuries and provide a new option for patients  
4 145 with ACL injuries.

## 5 146 **Methods and analysis**

### 6 147 **Study setting**

7 148 This was a randomized parallel-controlled trial of patients with ACL rupture who were  
8 149 hospitalized in the Department of Orthopedics at Xiangya Hospital of Central South  
9 150 University from 03/2022 to 03/2023. The Medical Ethics Committee of Xiangya  
10 151 Hospital of Central South University approved the ethical application related to this  
11 152 study and has filed it (ethical approval number: 202110478). All subjects signed the  
12 153 informed consent form before the operations.  
13 154

### 14 155 **Eligibility criteria**

15 156 The inclusion criteria are as follows: (1) age of 16-45 years; (2) unilateral knee MRI  
16 157 showing unilateral knee ACL fracture; (3) combined meniscal injury that does not  
17 158 interfere with the standard postoperative rehabilitation program after intraoperative  
18 159 management; (4) combined grade III or lower cartilage injury that does not interfere  
19 160 with the standard postoperative rehabilitation program; (5) satisfaction of 24 months of  
20 161 follow-up; (6) no previous injury to the healthy knee; (7) informed consent of the  
21 162 subject and signing of relevant documents.

22 163 The inclusion criteria are as follows: (1) age of <16 years or >45 years; (2) previous  
23 164 ACL reconstruction or bilateral ACL injury; (3) MRI revealed posterior cruciate  
24 165 ligament (PCL), medial collateral ligament (MCL), or lateral collateral ligament (LCL)  
25 166 injury; (4) grade IV cartilage injury or unstable longitudinal meniscus tear requiring  
26 167 repair that interferes with standard rehabilitation protocols after surgical management;  
27 168 (5) patients who cannot meet 24 follow-up visits; (6) patients with severe underlying  
28 169 medical conditions that make surgery inadvisable, or patients with mental illness,  
29 170 pregnancy during planned trials, or other conditions that are not conducive to late  
30 171 follow-up.  
31 172

### 32 173 **Participant selection:**

33 174 Patients diagnosed with ACL rupture by clinicians through physical examination and  
34 175 MRI imaging evaluation were assigned to the trial and control groups according to the  
35 176 time of admission according to the random number table method after final  
36 177 confirmation of ACL rupture under arthroscopy. The trial group was reconstructed  
37 178 using ACL reconstruction with the internal brace technique, and the control group was  
38 179 reconstructed using ACL reconstruction without the internal brace technique.  
39 180 Preoperative assessment of patients was performed before surgery, and a uniform  
40 181 rehabilitation program was performed after surgery. The protocol (version 1.0, March,  
41 182 2022) inclusion start date was March 2022, with an expected cutoff date of March 2023.  
42 183 The follow-up period is 2 years, with the last follow-up expected in March 2025 (the  
43 184 exact end date is based on the inclusion of the last subject), and the specific technical  
44 185 route is shown in **Fig. 1**.  
45 186

### 46 187 **Study sample**

47 188 IKDC score consists of three aspects: 1) symptoms, including pain, stiffness, swelling,  
48 189 interlocking/jamming, and playing with a tender leg; 2) motion and daily activities; and  
49 190 3) current knee function and knee function before the knee injury (not included in the  
50 191 total score), which is the main outcome indicator of this study, based on which the  
51 192 sample size required for this trial was estimated. The minimum clinically important  
52  
53  
54  
55  
56  
57  
58  
59  
60



1  
2  
3 193 difference (MCID) of the IKDC scale was reported to be between 8.8 and 15.6<sup>(22-24)</sup>,  
4 194 we set  $\delta$  to 10, and the overall sample standard deviation was set to 13 based on the  
5 195 relevant literature<sup>(22-24)</sup>. To satisfy the test efficacy ( $1-\beta$ ) of 0.8 and the test level  $\alpha$  of  
6 196 0.05, the sample size calculated for each group was 27 according to the following  
7 197 formula, and considering a 20% lost visit rate, 32 patients were included in each group  
8 198 with a total of 64 patients included.  
9 199

### 200 **Randomization and Concealed Grouping**

201 All eligible subjects were included after screening by inclusion and exclusion criteria,  
202 and the subjects enrolled were randomly assigned to the ACL reconstruction with  
203 internal brace technique group (combined group, n=32) and the standard ACL  
204 reconstruction group (simple group, n=32) using the random number table method. The  
205 occurrence of adverse events was recorded throughout the follow-up. All data were  
206 collected by 2 physicians who were unaware of the grouping. During postoperative  
207 rehabilitation, all subjects were given a uniform standard rehabilitation program by a  
208 professionally trained and relevant rehabilitation physician or clinician, and the  
209 rehabilitation therapist was not aware of the patient's intraoperative condition.  
210

### 211 **Interventions and surgical techniques**

212 In all cases, all inside ACL reconstruction was performed using autologous  
213 semitendinosus tendons with the aid of knee arthroscopy. Semitendinosus tendons were  
214 braided with sutures (0 FiberWire Suture, Arthrex) to form four strands of ACL grafts  
215 (all between 7.5 and 10 mm in diameter, supplemented with semimembranous tendons  
216 less than 7.5 mm in diameter). In the ACLR group, the braided graft femoral end and  
217 tibial segment were suspended and fixed with a TightRope (ACL TightRope RT  
218 Implant, Arthrex), and in the ACLR with internal brace group, a separate wire tape (2  
219 mm FiberTape, Arthrex) was added to the ACLR group, and the suture was fixed with  
220 a knotless bone anchor (4.75-mm PEEK SwiveLock, Arthrex) distally and a TightRope  
221 suspension proximally as in the graft. **Fig. 2.**  
222

223 The procedure was as follows: the patient was anesthetized, a tourniquet was applied  
224 to the affected limb, routine surgical disinfection of the knee was performed, a sterile  
225 surgical sheet was placed, the semitendinosus tendon was palpated, a straight incision  
226 was made medial to the tibial tuberosity, the semitendinosus tendon was removed with  
227 a tendon extractor, 10 ml of ropivacaine was injected at the tendon extraction site, and  
228 then, the removed semitendinosus tendon was braided into 4 strands using the  
229 GraftLink (Arthrex) technique<sup>(25)</sup>. A conventional knee arthroscopic approach was  
230 performed on the anteromedial and anterolateral sides of the affected knee to explore  
231 the injured structures and remove the remaining portion of the ACL. The knee was  
232 flexed to the extreme, and the femoral tract was created at the footprint of the ACL stop  
233 at the lateral femoral condyle and the tibial tract at the footprint of the ACL start. The  
234 graft and two TightRope titanium plates were pulled into the knee cavity and pulled out  
235 through the femoral and tibial tracts, respectively. The tabs were flipped, the tab rings  
236 were tightened, and the titanium plates were fixed. In the ACLR with internal brace  
237 group, the femoral end of the FiberTape wire band was fixed with a TightRope ring,  
238 the wire band was tensioned in the extended position, and the tibial end was fixed  
239 independently with a knotless bone anchor (4.75-mm PEEK SwiveLock, Arthrex).  
240

241 All patients received a uniform training and rehabilitation program after surgery, and  
242

242 the entire rehabilitation process was divided into 7 phases. The first 3 phases focused  
 243 on controlling swelling and restoring range of motion, which usually required 4 weeks.  
 244 Detailed rehabilitation plan can be found in **Table 1**. Phases 4-5 focused on restoration  
 245 of quadriceps muscle strength control, balance and core strength restoration training,  
 246 and phases 6-7 were gradually resumption of various sports activities, from daily  
 247 activities to professional activities or contact sports. Detailed rehabilitation plan can be  
 248 found in **Table 2** and **Table 3**.

249  
250

**Table 1. phases 1-3 of the post-ACL reconstruction rehabilitation program**

| Phase                                              | Movement Exercises                                                                                                                                                                                                                                                                                                                                                                                                                                                                                                                                                                                                                                                                                                                                                                                                                                                                                                                                                                                                                                                                                                                                                                                                                                                                                                                                                                                                                                   | Gait Exercises                                                                                                                                                                                   | Manipulative Massage                                                                                                                                                                | Rehabilitation Goals                                                                                                                                                                                                                                                  | Precautions                                                                                                                                                                                                  |
|----------------------------------------------------|------------------------------------------------------------------------------------------------------------------------------------------------------------------------------------------------------------------------------------------------------------------------------------------------------------------------------------------------------------------------------------------------------------------------------------------------------------------------------------------------------------------------------------------------------------------------------------------------------------------------------------------------------------------------------------------------------------------------------------------------------------------------------------------------------------------------------------------------------------------------------------------------------------------------------------------------------------------------------------------------------------------------------------------------------------------------------------------------------------------------------------------------------------------------------------------------------------------------------------------------------------------------------------------------------------------------------------------------------------------------------------------------------------------------------------------------------|--------------------------------------------------------------------------------------------------------------------------------------------------------------------------------------------------|-------------------------------------------------------------------------------------------------------------------------------------------------------------------------------------|-----------------------------------------------------------------------------------------------------------------------------------------------------------------------------------------------------------------------------------------------------------------------|--------------------------------------------------------------------------------------------------------------------------------------------------------------------------------------------------------------|
| <b>Phase 1</b><br><b>(within</b><br><b>1 week)</b> | (1) Bed heel against the bed for flexion and extension sliding; supine position, the affected leg bends the hip, flexes the knee and places the heel on the wall for flexion and extension sliding; sitting position, legs on the floor, the healthy leg is placed in front of the affected leg and assists the affected leg in flexing the knee.<br>(2) Ankle pump exercises (the affected leg is elevated, and the foot performs upward hooking and downward stepping movements, as well as rotational movements).<br>(3) Anterior thigh muscle tensing exercises with the knee in the straight position (can be combined with neuromuscular electrical stimulation or biofeedback exercises).<br>(4) Hip muscle group training.<br>(5) Pillow clamping of the legs for medial thigh muscle group strength training.<br>(6) The brace is locked in the 0° position, and the affected leg is lifted in the supine, prone and prone positions for muscle strength training.<br>(7) Passive knee extension exercises: prone position with the affected knee extended out of the bed for suspension or supine position with the affected leg in a slightly elevated heel position and the knee joint suspended.<br>(8) In the above weight-bearing exercise position, weight transfer training (front-to-back and left-to-right) can be performed.<br>(9) Continuous passive movement apparatus training with increased knee flexion by 5° to 10°/day. | (1) Flat and step gait training with the support of a knee protection brace and double crutches.<br>(2) Cold compresses after training to reduce edema.                                          | (1) Push the patella in all directions.<br>(2) Manipulation of the posterior thigh muscles of the affected limb or sitting and standing to pull the muscles to relieve their spasm. | Active mobility of the knee joint reaches 0° to 90°. (1) The anterolateral thigh muscles can be tightened better.<br>(2) The affected limb can be fully weight bearing with the help of braces and crutches.<br>(3) Edema control is good.<br>(4) Good wound healing. | (1) Brace locked in 0° position, crutches, and weight-bearing exercises within tolerable range.<br>(2) Wear the brace at night and lock it in the 0° position while sleeping with the affected leg elevated. |
|                                                    | <b>Phase 2</b><br><b>(1-2</b><br><b>weeks)</b>                                                                                                                                                                                                                                                                                                                                                                                                                                                                                                                                                                                                                                                                                                                                                                                                                                                                                                                                                                                                                                                                                                                                                                                                                                                                                                                                                                                                       | (1) Fixed cycling exercises (from small to full range of pedal rotation).<br>(2) Tightening exercises and 90° muscle strength exercises for the anterior thigh muscles in the straight position. | (1) The healthy leg stands outside the treadmill with weight, and the                                                                                                               | (1) Manipulation to push the patella treatment.                                                                                                                                                                                                                       | The active mobility of the knee joint reaches 0° to 120°. (1) Straight leg elevation; anterior                                                                                                               |



|    |     |                                              |                   |               |                     |
|----|-----|----------------------------------------------|-------------------|---------------|---------------------|
| 1  |     |                                              |                   |               |                     |
| 2  |     |                                              |                   |               |                     |
| 3  |     |                                              |                   |               |                     |
| 4  |     | (3) Standing balance training on the         | affected leg      | (2)           | thigh muscles can   |
| 5  |     | affected leg with a single leg wearing a     | simulates         | Manipulation  | be tightened with   |
| 6  |     | support.                                     | walking on the    | n of the      | force.              |
| 7  |     | (4) Balance training on a balance board      | treadmill.        | posterior     | (2) With crutches,  |
| 8  |     | with forward and backward weight             | (2) The affected  | thigh muscle  | the patient can     |
| 9  |     | transfer.                                    | leg crosses the   | group for     | walk normally with  |
| 10 |     | (5) Continuous passive activity equipment    | obstacle training | relaxation    | a nonlocking brace. |
| 11 |     | training.                                    | and simulates     | and           |                     |
| 12 |     | (6) Start small partial weight-bearing squat | walking.          | stretching    |                     |
| 13 |     | exercises (within 30° of knee flexion).      |                   | exercises.    |                     |
| 14 |     | (7) Passive straightening exercises with the |                   |               |                     |
| 15 |     | heel slightly elevated and the knee hanging  |                   |               |                     |
| 16 |     | in the air.                                  |                   |               |                     |
| 17 |     | (8) Straight leg raises training (all        |                   |               |                     |
| 18 |     | directions).                                 |                   |               |                     |
| 19 |     | (9) Terminal angle knee extension training   |                   |               |                     |
| 20 |     | in the standing position using an elastic    |                   |               |                     |
| 21 |     | band.                                        |                   |               |                     |
| 22 |     |                                              |                   |               |                     |
| 23 |     |                                              |                   |               |                     |
| 24 |     |                                              |                   |               |                     |
| 25 |     |                                              |                   |               |                     |
| 26 |     |                                              |                   |               |                     |
| 27 |     |                                              |                   |               |                     |
| 28 |     |                                              |                   |               |                     |
| 29 |     |                                              |                   |               |                     |
| 30 |     | (1) Fixed bicycle training gradually         |                   |               |                     |
| 31 |     | increases the resistance to improve          |                   |               |                     |
| 32 |     | exercise endurance.                          |                   |               |                     |
| 33 |     | (2) Tightening exercises for the anterior    |                   | (1)           |                     |
| 34 |     | thigh muscle group in the straight position  |                   | Manipulation  | The knee joint      |
| 35 |     | and muscle strength exercises in the range   |                   | n to push the | moves to an active  |
| 36 |     | of 60° to 90° until the muscle strength of   |                   | patella       | full angle, in line |
| 37 |     | both legs is equal.                          |                   | treatment.    | with the healthy    |
| 38 |     | (3) 0° to 60° squat training, gradually      | Exercise with     | (2)           | side leg.           |
| 39 |     | increasing the resistance strength (for      | rope tied around  | Manipulation  | (1) Normal gait can |
| 40 |     | patients with meniscal repair, squat to the  | the waist or on a | n of the      | be achieved         |
| 41 |     | target angle on the healthy leg before       | treadmill for     | surgical      | without any         |
| 42 |     | shifting the weight to the middle of the two | forward and       | scar.         | walking aid.        |
| 43 |     | legs).                                       | backward gait     | (3)           | (2) Self-care of    |
| 44 |     | (4) Stand with both legs on a balance board  | training.         | Manipulative  | daily life (may     |
| 45 |     | for balance training in multiple directions. |                   | e passive     | have some           |
| 46 |     | (5) Single-leg standing balance training on  |                   | knee flexion  | difficulty in       |
| 47 |     | the affected leg (with eyes closed and open  |                   | or extension  | walking up and      |
| 48 |     | and on a support surface with different      |                   | angle         | down steps).        |
| 49 |     | degrees of softness).                        |                   | exercises.    |                     |
| 50 |     | (6) Straight leg raise training in the       |                   |               |                     |
| 51 |     | standing position, which can increase the    |                   |               |                     |
| 52 |     | resistance appropriately.                    |                   |               |                     |
| 53 | 251 |                                              |                   |               |                     |
| 54 |     |                                              |                   |               |                     |
| 55 | 252 |                                              |                   |               |                     |
| 56 | 253 |                                              |                   |               |                     |
| 57 |     |                                              |                   |               |                     |
| 58 |     |                                              |                   |               |                     |
| 59 |     |                                              |                   |               |                     |
| 60 |     |                                              |                   |               |                     |

**Table2: Phases 4-5 of the post-ACL reconstruction rehabilitation program**

254  
255

| Phase                       | Movement Exercises                                                                                                                                                                                                                  | Gait Exercises                                                      | Manipulative Massage | Rehabilitation Goals                                                                                            | Precautions                                                                                |
|-----------------------------|-------------------------------------------------------------------------------------------------------------------------------------------------------------------------------------------------------------------------------------|---------------------------------------------------------------------|----------------------|-----------------------------------------------------------------------------------------------------------------|--------------------------------------------------------------------------------------------|
| <b>Phase 4 (4-8 weeks)</b>  | (1) Fixed cycling training: gradually increasing the resistance.                                                                                                                                                                    |                                                                     |                      |                                                                                                                 |                                                                                            |
|                             | (2) Squat training: Double leg transition to a single leg (0° to 60°), gradually increasing resistance.                                                                                                                             |                                                                     |                      | (1) Center of gravity in the middle, squatting bilaterally to 60° (no more than 60°).                           |                                                                                            |
|                             | (3) Lunge training (0° to 60°).                                                                                                                                                                                                     |                                                                     |                      | (2) Knee in good condition (slight pain and effusion, no instability).                                          | (1) Do not participate in sports with high impact on the joints, such as running, jumping. |
|                             | (4) Step training: centripetal and centrifugal contraction of the anterior thigh muscles (knee does not exceed 60°).                                                                                                                |                                                                     |                      | (3) The circumference at the upper edge of the patella is 10 cm within a 1 to 2 cm difference between the legs. | (2) Do not participate in sports with high lateral stress on the joints.                   |
|                             | (5) Tiptoe training: Double leg transition to single leg.                                                                                                                                                                           |                                                                     |                      | (4) The affected limb can maintain balance for > 30 seconds while standing on one leg with little body sway.    | (3) Try not to squat deeply (limit to 0° to 60°).                                          |
|                             | (6) Swing exercise: the affected leg stands on one leg, and the healthy leg is strapped with an elastic band and swings, transitioning from front-to-back swing to lateral swing and then to rotation or random direction movement. | Go around obstacles at normal walking speeds on different surfaces. |                      | Manual method to loosen surgical scars.                                                                         |                                                                                            |
|                             | (7) Rotational stability training: static lunge stance, lateral pull pulley exercise.                                                                                                                                               |                                                                     |                      |                                                                                                                 |                                                                                            |
|                             | (8) Exercise with rope tied around the waist to provide resistance; walking exercises in the forward and backward, left and right directions.                                                                                       |                                                                     |                      |                                                                                                                 |                                                                                            |
|                             | (9) Walking exercises on the treadmill in 4 directions.                                                                                                                                                                             |                                                                     |                      |                                                                                                                 |                                                                                            |
|                             | (10) Balance board training: a variety of support surfaces, double-legged standing.                                                                                                                                                 |                                                                     |                      |                                                                                                                 |                                                                                            |
|                             | (11) Single-leg stand for ball tossing exercises.                                                                                                                                                                                   |                                                                     |                      |                                                                                                                 |                                                                                            |
|                             | (12) Core training: supine or prone position for bridge exercise, standing pull pulley.                                                                                                                                             |                                                                     |                      |                                                                                                                 |                                                                                            |
| <b>Phase 5 (8-12 weeks)</b> | (1) Squat training: transition from double to single leg (0° to 60°), gradually increasing resistance.                                                                                                                              |                                                                     |                      | (1) The thigh circumference of both legs is close to the same (within 1 cm of each other).                      |                                                                                            |
|                             | (2) Lunge training (0° to 60°).                                                                                                                                                                                                     |                                                                     |                      | (2) The affected limb squats down to 60° on one leg.                                                            | Patellar tendonitis may occur.                                                             |
|                             | (3) Tiptoe training: double-leg transition to single-leg.                                                                                                                                                                           |                                                                     |                      | (3) The affected limb can stand on one leg to maintain balance for 60 seconds.                                  |                                                                                            |
|                             | (4) Increasing the strength of the posterior lateral muscle group with plyometric training. Core muscle strength training.                                                                                                          |                                                                     |                      | (4) Little, if any, edema with activity.                                                                        |                                                                                            |
|                             | ① Combined strength training with balance training (throwing and catching balls on balance board, small squat on balance board, etc.)                                                                                               | —                                                                   | —                    |                                                                                                                 |                                                                                            |
|                             | ② Advanced balance function training (affected leg standing on one leg, hand or opposite foot to touch objects on the ground or lateral pulling elastic band)                                                                       |                                                                     |                      |                                                                                                                 |                                                                                            |
|                             | ③ Swimming training, in addition to breaststroke. Additionally, care should be taken not to stir the leg at a deep squatting angle or to use a splint when swimming.                                                                |                                                                     |                      |                                                                                                                 |                                                                                            |
|                             | ④ Cycling training every other day.                                                                                                                                                                                                 |                                                                     |                      |                                                                                                                 |                                                                                            |

256 **Table 3: Phases 6-7 of the post-ACL reconstruction rehabilitation program**

257

258

| Phase                 | Movement Exercises                                                                                                                                                                                      | Gait Exercises | Manipulative Massage | Rehabilitation Goals                                                                                                                                                                                                                                                                                                            | Precautions                                                                                                                                                                                                                                               |
|-----------------------|---------------------------------------------------------------------------------------------------------------------------------------------------------------------------------------------------------|----------------|----------------------|---------------------------------------------------------------------------------------------------------------------------------------------------------------------------------------------------------------------------------------------------------------------------------------------------------------------------------|-----------------------------------------------------------------------------------------------------------------------------------------------------------------------------------------------------------------------------------------------------------|
| Phase 6 (12-16 weeks) | (1) Jogging movement: multiple directions for running.<br>(2) Increasing the speed of all sports.<br>(3) Skateboard training, slow walking in the water and other forms of exercise can be carried out. | —              | —                    | (1) Squat down to 60° on one leg with the affected limb and repeat 20 times.<br>(2) The affected leg can stand on one leg to maintain balance for at least 60 seconds.<br>(3) Vertical or horizontal jump with both legs with good landing position.<br>(4) Single-leg jump: 80% of the ability of the healthy leg is achieved. | Avoid wrong movements or posture.<br>(1) Landing with the knee joint too straight.<br>(2) The knee joint is turned outward or inward when landing.<br>(3) When landing or bouncing, the healthy leg always takes the lead, and the affected leg does not. |
|                       | (1) Jogging movement: multiple directions for running.<br>(2) Increasing the speed of all sports.<br>(3) Skateboard training, slow walking in the water and other forms of exercise can be carried out. | —              | —                    | (1) Squat down to 60° on one leg with the affected limb and repeat 20 times.<br>(2) The affected leg can stand on one leg to maintain balance for at least 60 seconds.<br>(3) Vertical or horizontal jump with both legs with good landing position.<br>(4) Single-leg jump: 80% of the ability of the healthy leg is achieved. | Avoid wrong movements or posture.<br>(1) Landing with the knee joint too straight.<br>(2) The knee joint is turned outward or inward when landing.<br>(3) When landing or bouncing, the healthy leg always takes the lead, and the affected leg does not. |

259

260

261 **Baseline indicators and observations**

262 Baseline and preoperative patient characteristics included the subject's sex, age,  
263 affected limb (left or right), cause of injury (playing basketball, other sports such as  
264 soccer), smoking status (yes or no), time from injury to surgery (fresh injury or old  
265 rupture), whether the injury was accompanied by cartilage and meniscal damage, time  
266 of surgery, and degree of ACL fracture (partial or total).

267

268 **Study endpoints**

269 **Primary outcome/endpoint:** The IKDC scores changes in knee function from  
270 preoperative to 6 months postoperative. The IKDC is a commonly used tool to evaluate  
271 outcomes after various knee surgeries, including ACL reconstruction(26). The IKDC  
272 knee score consists of a knee assessment (10 entries) and a knee ligament checklist (8

273 entries), covering joint pain, motor level and daily activity ability, with a total score of  
274 0 to 100. The IKDC can address knee symptoms, function and physical activity. The  
275 IKDC assesses symptoms, function and physical activity of the knee. Patients were  
276 evaluated with the questionnaire preoperatively and at follow-up visits at 1, 3, 6, 12,  
277 and 24 months postoperatively.

278 **Secondary outcomes/endpoints:** LKS, KOOS (including knee symptoms, pain,  
279 activities of daily living, sports and recreational activities, and quality of life), VAS,  
280 Lachman test, MRI imaging data, and assessment of knee stability using the Kneelax3  
281 knee stability meter.

282 (1) Kneelax3 (MONITORED REHAB SYSTEMS B.V. Model: KNEELAX3, The  
283 Netherlands): preoperatively and 1, 3, 6, 12 and 24 months postoperatively; the  
284 Kneelax3 arthrometer was used for the assessment of knee stability.

285 (2) Lysholm knee score: This scoring system consists of 8 questions on a scale of 0-  
286 100, with higher scores representing better functional status of the patient. The main  
287 tendency is toward activities of daily living, and patients were assessed by  
288 questionnaires before surgery and at 1-, 3-, 6-, 12-, and 24-month postoperative follow-  
289 up visits(27).

290 (3) KOOS score: The KOOS consists of 5 subscales: pain, other knee symptoms,  
291 activities of daily living (ADL), function in sport and recreation (Sport/Rec), and knee-  
292 related quality of life (QOL)(28). Patients were given one week to consider before  
293 answering the questions, and each question had five alternative boxes with scores  
294 ranging from 0 to 4. Standard scores were calculated for each subscale (100 for no  
295 symptoms and 0 for extreme symptoms), and patients were assessed with  
296 questionnaires before surgery and at follow-up visits at 1, 3, 6, 12, and 24 months after  
297 surgery.

298 (4) VAS score: This is the visual analog pain scoring method, which is more sensitive  
299 and comparable. In this trial, a 100-mm VAS pain score (including resting state score,  
300 30-min postwalk score and overall pain level in the past month) was used(29). This  
301 protocol only assesses pain at rest, with 0 representing no pain and 100 representing the  
302 most severe pain. Patients were evaluated with questionnaires at preoperative and  
303 postoperative follow-up visits at 1, 3, 6, 12, and 24 months.

304 (5) Lachman test: This is a test used to assess ACL function with the patient in the  
305 supine or prone position with the knee flexed at approximately a 30° angle(30). The  
306 examiner uses one hand to immobilize the thigh, while the other hand attempts to move  
307 the tibia forward. Positive results suggest that patients with ACL injuries be tested  
308 preoperatively and at follow-up visits at 1, 3, 6, 12, and 24 months postoperatively.

309 (6) MRI assessment: MRI was performed at 12 and 24 months postoperatively to assess  
310 the patient's reconstructed ACL.

311

### 312 **Patient termination and withdrawal criteria**

313 Patients may withdraw from this trial at any time. Patients may withdraw from the study  
314 for the following reasons.

315 **(1) Surgical failure:** 1) occurrence of infection, 2) no secondary rupture of the  
316 reconstructed ligament (rupture of the ligament, rupture of the internal brace  
317 augmentation line and both in the trial group, rupture of the reconstructed ligament in  
318 the control group), 3) knee instability: patient self-reported knee instability, or Lachman  
319 test (+) or Kneelax3 knee arthrometer test revealed a 3-mm difference in comparison  
320 with the healthy side.

321 **(2) Patient withdrawal from the trial:** All subjects had the right to withdraw from the

1  
2  
3 322 trial at any time during the study. A subject was withdrawn from the trial if any of the  
4 323 following occurred during the trial: 1) withdrawal of informed consent by the subject;  
5 324 2) a person who, in the opinion of the investigator, is no longer suitable for continuation  
6 325 of the clinical trial; 3) a woman who becomes pregnant during the clinical trial; 4) death  
7 326 of the subject; or 5) the subject is lost to follow-up.

### 327 **(3) Trial termination:**

328 1) The clinical trial institution and the investigator find that the risks to patients of  
329 continuing the clinical trial exceed the possible benefits; 2) the ethics committee finds  
330 that the rights of the subjects cannot be protected; 3) the sponsor requests termination  
331 of the trial for various reasons; and 4) the national administrative authority requests  
332 termination.

333 The time and reason for withdrawal from the trial were recorded in detail on the case  
334 report form; data were not collected for subjects who also withdrew from the trial or  
335 after the subject was deemed surgical failure, but subjects who withdrew from the trial  
336 due to adverse events had to be followed up until the adverse events stabilized or  
337 resolved or until the investigator deemed that further follow-up was no longer necessary.  
338

### 339 **Data management**

340 The trial used an electronic data collection (EDC) system for data management. The  
341 investigator or investigator-authorized research staff completed the electronic Case  
342 Report Form (eCRF) through the EDC system in an accurate, timely, complete and  
343 standardized manner based on the original information from the subjects. Questionnaire  
344 checking, data cleaning and summarization were performed in a timely manner after  
345 each follow-up visit. The follow-up survey is proposed to adopt the electronic  
346 questionnaire system of questionnaire star and on-site questionnaire survey, and the  
347 results of the on-site survey will be saved in time and organized in the database later.  
348 The data are entered by the investigator or the investigator's authorized researcher into  
349 the EDC according to their respective accounts. The data administrator verifies the  
350 reliability, completeness, and accuracy of the data in the EDC. If any questionable data  
351 are found, a challenge can be issued in the system, and the investigator or the  
352 investigator's delegated researcher verifies, corrects, or answers the query. When all  
353 data have been entered into the database and all queries have been resolved, the  
354 database will be locked by the data administrator. If there is a problem found after the  
355 database is locked and there is a need to correct it, the process of unlocking and  
356 relocking the data should be followed. After the database is locked, the data manager  
357 submits the data to the statistical analyst for statistical analysis as scheduled.  
358

### 359 **Statistical analysis**

360 **(1) Statistical design:** This trial was a randomized controlled clinical trial.

361 **(2) Principles of Statistical Analysis:** All statistical analyses were performed in SAS  
362 version 9.4 or later, R version 3.3.2 or later, or SPSS24. All statistical tests were  
363 performed using two-sided tests, and P values less than or equal to 0.05 were considered  
364 statistically significant for the differences tested (unless otherwise specified).

365 1) Summary statistics for continuous variables: including the mean, standard deviation,  
366 median, minimum, maximum, lower quartile (Q1), and upper quartile (Q3); summary  
367 statistics for categorical variables, including the number of cases and percentage of each  
368 category.

369 2) Between-group comparisons of demographic baseline characteristics: Group  
370 comparisons for continuous variables will be made using independent samples t test



1  
2  
3 371 (chi-square, normal distribution) or Wilcoxon rank sum test depending on data  
4 372 distribution, and chi-square test or the exact probability method for categorical  
5 373 variables (if chi-square test is not applicable).

6 374 **(3) Completion and demographic analyses**

7 375 Baseline analyses were based on the full analysis set (FAS). The enrollment and  
8 376 completion status of the trials were summarized, and the reasons for noncompletion are  
9 377 described in a detailed table. Subjects' demographic characteristics were described and  
10 378 compared to measure the comparability of the two groups. Validity reporting data were  
11 379 accepted only if the baseline was balanced between groups; otherwise, validity data  
12 380 were subject to correction before reporting.

13 381 **(4) Patient-reported outcome validity evaluation indices**

14 382 The outcome validity evaluation will be based on the FAS and the per-protocol set  
15 383 (PPS). The statistical description and inference of the data will be based on the  
16 384 characteristics of the data and the selection of applicable descriptive indicators and  
17 385 hypothesis testing methods.

18 386 **Primary patient-reported outcome:** comparison of IKDC knee scores at 6 months  
19 387 ( $\pm 2$  weeks) postoperatively in the trial and control groups. We will use a linear  
20 388 regression model for analysis to correct for some possible confounding factors, such as  
21 389 age, sex, and cause of injury. Preoperative baseline IKDC scores were used as  
22 390 predictors when conducting the analysis, and IKDC at 6 months ( $\pm 2$  weeks) was used  
23 391 as an indicator of posttreatment outcomes.

24 392 **Secondary patient-reported outcomes**

25 393 1) Because IKDC scores were measured at multiple different time points during patient  
26 394 follow-up, we were able to use a linear mixed model to compare changes over time  
27 395 between the trial and control groups.

28 396 2) Anterior tibial translation distance is measured by the Kneelax3 knee stability meter,  
29 397 and comparisons of anterior tibial translation distance between the test and control  
30 398 groups at the same postoperative time points with the same force will be performed  
31 399 using either an independent samples t test (chi-square, normally distributed) or a  
32 400 Wilcoxon rank sum test. A linear mixed model will also be used to compare and analyze  
33 401 the evolution of these consecutive results over time in both groups.

34 402 3) Here, the comparative analysis of failure rate and infection rate in the control group  
35 403 versus the test group during the main 6 months will be performed using the chi-square  
36 404 test or the t test.

37 405 4) Linear regression of continuous outcomes from baseline to 24 months, such as the  
38 406 Lysholm knee score, KOOS score (including knee symptoms, pain, activities of daily  
39 407 living, sports and recreational activities, quality of life), Lachman test, and pain visual  
40 408 analog score (VAS) protocols, will be used to compare and analyze the evolution of  
41 409 these continuous outcomes over time in the two groups using linear mixed models.

42 410 5) The morphology and signal intensity of the postoperative ACL will be assessed using  
43 411 MRI methods, and the different treatments will be compared at different time points  
44 412 using chi-square tests.

45 413 **Analysis of safety indicators**

46 414 The safety evaluation was based on the safety set (SS) analysis dataset. The  
47 415 internationally accepted MedDRA term set classification was used for adverse event  
48 416 coding, and the types of adverse events, frequency, severity, and relationship to internal  
49 417 brace enhancement line generation and surgery were summarized by group. A detailed  
50 418 list of the various adverse events is provided, with special notation for subjects who  
51 419 discontinued the trial because of adverse events and for those who experienced serious



1  
2  
3 420 adverse events. The proportion of patients who developed complications between  
4 421 treatments was compared using a chi-square test.

5 422

### 6 423 **Patient and public involvement**

7 424 Patients and/or the public were not involved in the design, or conduct, or reporting, or  
8 425 dissemination plans of this research.

9 426

### 10 427 **Discussion**

11 428 This trial was conducted as a prospective randomized controlled trial to investigate the  
12 429 clinical efficacy of ACL reconstruction with or without the internal brace technique. In  
13 430 this 2-year follow-up study, the subjective, objective, and functional outcomes of  
14 431 patients who underwent ACL reconstruction with the application of the internal brace  
15 432 technique or ACL reconstruction alone were compared. The hypothesis of this study is  
16 433 that ACL reconstruction with the internal brace technique will prove to be more stable  
17 434 than ACL reconstruction alone in the early postoperative period, with a lower incidence  
18 435 of secondary injury, reduced duration and extent of pain, and an earlier return to  
19 436 preinjury activity levels, but there may be no significant difference between the two  
20 437 groups regarding patient-reported outcome indicators as recovery time increases.

21 438

22 439 ACL rupture is a very common knee injury in the athletic population and has been  
23 440 extensively studied over the years. Studies as early as the late 20th century have shown  
24 441 that ACLR is superior to ACL repair(31, 32). The ACL is an important structure for  
25 442 maintaining knee stability, preventing anterior tibial displacement and limiting  
26 443 intratibial rotation(33), making ACL reconstruction surgery the gold standard of  
27 444 treatment for patients recovering motion or performing rotational activities after an  
28 445 ACL rupture in the knee(34). The recovery of knee function after surgery depends on  
29 446 the ability of the ACL graft to withstand appropriate loads during rehabilitation and  
30 447 after return to sports. The tendon graft implanted in the human knee joint survives in  
31 448 the intra-articular environment and gradually in the ligaments. The graft is fragile and  
32 449 vulnerable to reinjury during the preremodeling phase prior to ligamentization(35), so  
33 450 a careful rehabilitation program should be developed to prevent reinjury during the  
34 451 rehabilitation period. Several studies have found a higher probability of rerupture or  
35 452 secondary revision for athletes and adolescents or for ACL reconstruction using either  
36 453 autologous tendons or allogeneic tendons(10, 36). Therefore, a surgical approach that  
37 454 increases the structural strength of the graft and protects it during the early stages of  
38 455 graft ligamentization is of great importance.

39 456

40 457 The biomechanical properties of the intra-articular reconstructed ligaments were found  
41 458 to improve at 8 weeks postoperatively for the FiberTape suture applied in a rabbit model.  
42 459 Additionally, during this period, FiberTape did not adversely affect bone tunnel healing  
43 460 or cause a long-term increase in indicators of inflammation(12). In a dog model, no  
44 461 severe inflammation or immune response, bone erosion, or premature OA development  
45 462 was observed at 6 months postoperatively(37). The results of these studies will support  
46 463 the biocompatibility and safety of intra-articular suture tape for ACLR enhancement.

47 464

48 465 A study of load sharing after ACL graft enhancement by suture tape reported that load  
49 466 sharing began at 200 N and 300 N for 7-mm and 9-mm grafts, respectively. The final  
50 467 peak load (400 N) would be shared by 31% (7-mm graft) and 20% (9-mm graft) by the  
51 468 suture tape(38). Suture tape ligament augmentation may potentially protect biological

52 469

53 470

54 471

55 472

56 473

57 474

58 475

59 476

60 477

1  
2  
3 469 grafts from excessive peak loading and elongation. After ACL reconstruction in the  
4 470 early recovery phase, suture band augmentation increases ACL graft stiffness by 104%  
5 471 and the ultimate breaking load by 57%, which will reduce the graft failure rate in  
6 472 clinical situations.

7 473  
8 474 A recent systematic review paper by Christopher et al. concluded from biomechanical,  
9 475 animal and clinical studies that the application of suture tape augmentation in ACL  
10 476 reconstruction increases its biomechanical stability(39). Therefore, in this randomized  
11 477 controlled trial, we will conduct a prospective observational comparison as well as a  
12 478 long-term follow-up to truly elucidate the clinical efficacy of internal bracing in ACL  
13 479 reconstruction.  
14 480

## 17 481 **Abbreviations**

18 482 Anterior cruciate ligament (ACL)  
19 483 International Knee Documentation Committee (IKDC)  
20 484 the Knee Injury and Osteoarthritis Outcome Score (KOOS)  
21 485 Lysholm knee score (LKS)  
22 486 Visual Analog Scale (VAS)  
23 487 ultrahigh molecular weight polyethylene (UHMWPE)  
24 488 Standard Protocol Items: Recommendations for Interventional Trials (SPIRIT)  
25 489 activities of daily living (ADL)  
26 490 sport and recreation (Sport/Rec)  
27 491 quality of life (QOL)  
28 492 medial collateral ligament (MCL)  
29 493 minimum clinically important difference (MCID)  
30 494 electronic Case Report Form (eCRF)  
31 495 safety set (SS)  
32 496

## 37 497 **Ethics and dissemination**

38 498 The trial was approved by the Medical Ethics Committee of Xiangya Hospital of  
39 499 Central South University on October 26, 2021 with the ethics number "202110478" and  
40 500 prospectively registered in the China Clinical Trials Registry on March 14, 2022 with  
41 501 the registration number: ChiCTR2200057526. All subjects signed an informed consent  
42 502 form before participating in this trial and we will protect the patients from any invasion  
43 503 of their private privacy. All investigators will keep the study results confidential until  
44 504 after the data are made public, and no data related to the database will be released by  
45 505 the investigators without the approval of the principal investigator. We will publish the  
46 506 findings and data in peer-reviewed journals, and present them at national and  
47 507 international conferences.  
48 508

## 51 509 **Acknowledgements**

52 510 We would like to thank all the medical and nursing staff of the Department of Bone and  
53 511 Joint Surgery of Xiangya Hospital of Central South University for their unfailing care  
54 512 and great help to our patients. We also thank the patients for their support and trust in  
55 513 us.  
56 514

## 58 515 **Author contributions**

1  
2  
3 516 WF-X and YS-L established the study design, WH-L conceived the design and wrote  
4 517 the draft manuscript; D-L, ZJ-C, and LY-P were involved in data acquisition, analysis,  
5 518 and interpretation; and WQ-X, HF-J, and X-L designed the rehabilitation protocol. All  
6 519 authors read and approved the final manuscript.  
7  
8 520

## 9 521 **Funding**

10 522 This research received no specific grant from any funding agency in the public,  
11 523 commercial, or not-for-profit sectors.  
12 524

## 13 525 **Competing interests**

14 526 The authors declare that they have no competing interests regarding the present study.  
15 527

## 16 528 **Author information**

17 529 Wen-hao Lu, Email: lwhao0717@csu.edu.cn

18 530 Di Liu, Email: liudi9704@csu.edu.cn

19 531 Zi-jun Cai, Email: caizijun@csu.edu.cn

20 532 Lin-yuan Pan, Email: Panlinyuan@csu.edu.cn

21 533 Wen-qing Xie, Email: xiewenqing@csu.edu.cn

22 534 Hong-Fu Jin, Email: 218112327@csu.edu.cn.

23 535 Xu Liu, Email: liuxu990702@163.com

24 536 Yu-sheng Li, Email: liyusheng@csu.edu.cn.

25 537 Wen-feng Xiao, Email: xiaowenfneng@csu.edu.cn.  
26 538

## 27 539 **Author Affiliations**

28 540 <sup>1</sup> Department of Orthopaedics, Xiangya Hospital, Central South University, Changsha  
29 541 410008, Hunan, China.

30 542 <sup>2</sup> National Clinical Research Center for Geriatric Disorders, Xiangya Hospital, Central  
31 543 South University, Changsha 410008, Hunan, China.  
32 544

## 33 545 **References**

34 546 1. Patterson BE, Culvenor AG, Barton CJ, Guermazi A, Stefanik JJ, Morris HG, et  
35 547 al. Worsening Knee Osteoarthritis Features on Magnetic Resonance Imaging 1 to 5  
36 548 Years After Anterior Cruciate Ligament Reconstruction. *Am J Sports Med.*  
37 549 2018;46(12):2873-83.

38 550 2. Suter LG, Smith SR, Katz JN, Englund M, Hunter DJ, Frobell R, et al. Projecting  
39 551 Lifetime Risk of Symptomatic Knee Osteoarthritis and Total Knee Replacement in  
40 552 Individuals Sustaining a Complete Anterior Cruciate Ligament Tear in Early Adulthood.  
41 553 *Arthritis Care Res (Hoboken).* 2017;69(2):201-8.

42 554 3. Filbay SR, Culvenor AG, Ackerman IN, Russell TG, Crossley KM. Quality of life  
43 555 in anterior cruciate ligament-deficient individuals: a systematic review and meta-  
44 556 analysis. *Br J Sports Med.* 2015;49(16):1033-41.

45 557 4. Moses B, Orchard J, Orchard J. Systematic review: Annual incidence of ACL  
46 558 injury and surgery in various populations. *Res Sports Med.* 2012;20(3-4):157-79.

47 559 5. Griffin LY, Albohm MJ, Arendt EA, Bahr R, Beynon BD, Demaio M, et al.  
48 560 Understanding and preventing noncontact anterior cruciate ligament injuries: a review  
49 561 of the Hunt Valley II meeting, January 2005. *Am J Sports Med.* 2006;34(9):1512-32.  
50  
51  
52  
53  
54  
55  
56  
57  
58  
59  
60

- 562 6. de Sa D, Shanmugaraj A, Weidman M, Peterson DC, Simunovic N, Musahl V, et  
563 al. All-Inside Anterior Cruciate Ligament Reconstruction-A Systematic Review of  
564 Techniques, Outcomes, and Complications. *J Knee Surg.* 2018;31(9):895-904.
- 565 7. Di Benedetto P, Di Benedetto E, Fiocchi A, Beltrame A, Causero A. Causes of  
566 Failure of Anterior Cruciate Ligament Reconstruction and Revision Surgical Strategies.  
567 *Knee Surg Relat Res.* 2016;28(4):319-24.
- 568 8. Robson AW. VI. Ruptured Crucial Ligaments and their Repair by Operation  
569 *Ann Surg.* 1903;37(5):716-8.
- 570 9. Vaishya R, Agarwal AK, Ingole S, Vijay V. Current Trends in Anterior Cruciate  
571 Ligament Reconstruction: A Review. *Cureus.* 2015;7(11):e378.
- 572 10. Takazawa Y, Ikeda H, Saita Y, Kawasaki T, Ishijima M, Nagayama M, et al.  
573 Return to Play of Rugby Players After Anterior Cruciate Ligament Reconstruction  
574 Using Hamstring Autograft: Return to Sports and Graft Failure According to Age.  
575 *Arthroscopy.* 2017;33(1):181-9.
- 576 11. Ellis HB, Matheny LM, Briggs KK, Pennock AT, Steadman JR. Outcomes and  
577 revision rate after bone-patellar tendon-bone allograft versus autograft anterior cruciate  
578 ligament reconstruction in patients aged 18 years or younger with closed physes.  
579 *Arthroscopy.* 2012;28(12):1819-25.
- 580 12. Soreide E, Denbeigh JM, Lewallen EA, Thaler R, Xu W, Berglund L, et al. In vivo  
581 assessment of high-molecular-weight polyethylene core suture tape for intra-articular  
582 ligament reconstruction: an animal study. *Bone Joint J.* 2019;101-b(10):1238-47.
- 583 13. Lubowitz JH, MacKay G, Gilmer B. Knee medial collateral ligament and  
584 posteromedial corner anatomic repair with internal bracing. *Arthrosc Tech.*  
585 2014;3(4):e505-8.
- 586 14. Gilmer BB, Crall T, DeLong J, Kubo T, Mackay G, Jani SS. Biomechanical  
587 Analysis of Internal Bracing for Treatment of Medial Knee Injuries. *Orthopedics.*  
588 2016;39(3):e532-7.
- 589 15. Heusdens CHW, Hopper GP, Dossche L, Roelant E, Mackay GM. Anterior  
590 cruciate ligament repair with Independent Suture Tape Reinforcement: a case series  
591 with 2-year follow-up. *Knee Surg Sports Traumatol Arthrosc.* 2019;27(1):60-7.
- 592 16. Nishimura A, Nakazora S, Senga Y, Kitaura Y, Fukuda A, Kato K, et al.  
593 Arthroscopic Internal Brace Augmentation With Arthroscopic Modified Broström  
594 Operation for Chronic Ankle Instability. *Arthrosc Tech.* 2021;10(4):e995-e1000.
- 595 17. Wilk KE, Arrigo CA, Bagwell MS, Rothermich MA, Dugas JR. Repair of the Ulnar  
596 Collateral Ligament of the Elbow: Rehabilitation Following Internal Brace Surgery. *J*  
597 *Orthop Sports Phys Ther.* 2019;49(4):253-61.
- 598 18. van Eck CF, Limpisvasti O, ElAttrache NS. Is There a Role for Internal Bracing  
599 and Repair of the Anterior Cruciate Ligament? A Systematic Literature Review. *Am J*  
600 *Sports Med.* 2018;46(9):2291-8.
- 601 19. Cook JL, Smith P, Stannard JP, Pfeiffer F, Kuroki K, Bozynski CC, et al. A Canine  
602 Arthroscopic Anterior Cruciate Ligament Reconstruction Model for Study of Synthetic  
603 Augmentation of Tendon Allografts. *J Knee Surg.* 2017;30(7):704-11.
- 604 20. Bachmaier S, Smith PA, Bley J, Wijdicks CA. Independent Suture Tape  
605 Reinforcement of Small and Standard Diameter Grafts for Anterior Cruciate Ligament

- 1  
2  
3 606 Reconstruction: A Biomechanical Full Construct Model. *Arthroscopy*. 2018;34(2):490-  
4 607 9.  
5  
6 608 21. Bedi A. Editorial Commentary: Buckle Up Surgeons: "Safety Belt" Reinforcement  
7 609 of Knee Anterior Cruciate Ligament Reconstruction Grafts. *Arthroscopy*.  
8 610 2018;34(2):500-1.  
9  
10 611 22. Collins NJ, Misra D, Felson DT, Crossley KM, Roos EM. Measures of knee  
11 612 function: International Knee Documentation Committee (IKDC) Subjective Knee  
12 613 Evaluation Form, Knee Injury and Osteoarthritis Outcome Score (KOOS), Knee Injury  
13 614 and Osteoarthritis Outcome Score Physical Function Short Form (KOOS-PS), Knee  
14 615 Outcome Survey Activities of Daily Living Scale (KOS-ADL), Lysholm Knee Scoring  
15 616 Scale, Oxford Knee Score (OKS), Western Ontario and McMaster Universities  
16 617 Osteoarthritis Index (WOMAC), Activity Rating Scale (ARS), and Tegner Activity  
17 618 Score (TAS). *Arthritis Care Res (Hoboken)*. 2011;63 Suppl 11(0 11):S208-28.  
18  
19 619 23. Irrgang JJ, Anderson AF, Boland AL, Harner CD, Neyret P, Richmond JC, et al.  
20 620 Responsiveness of the International Knee Documentation Committee Subjective Knee  
21 621 Form. *Am J Sports Med*. 2006;34(10):1567-73.  
22  
23 622 24. Li YL, Ning GZ, Wu Q, Wu QL, Li Y, Hao Y, et al. Single-bundle or double-  
24 623 bundle for anterior cruciate ligament reconstruction: a meta-analysis. *Knee*.  
25 624 2014;21(1):28-37.  
26  
27 625 25. Lubowitz JH. All-inside anterior cruciate ligament graft link: graft preparation  
28 626 technique. *Arthrosc Tech*. 2012;1(2):e165-8.  
29  
30 627 26. Greco NJ, Anderson AF, Mann BJ, Cole BJ, Farr J, Nissen CW, et al.  
31 628 Responsiveness of the International Knee Documentation Committee Subjective Knee  
32 629 Form in comparison to the Western Ontario and McMaster Universities Osteoarthritis  
33 630 Index, modified Cincinnati Knee Rating System, and Short Form 36 in patients with  
34 631 focal articular cartilage defects. *Am J Sports Med*. 2010;38(5):891-902.  
35  
36 632 27. Briggs KK, Lysholm J, Tegner Y, Rodkey WG, Kocher MS, Steadman JR. The  
37 633 reliability, validity, and responsiveness of the Lysholm score and Tegner activity scale  
38 634 for anterior cruciate ligament injuries of the knee: 25 years later. *Am J Sports Med*.  
39 635 2009;37(5):890-7.  
40  
41 636 28. Collins NJ, Prinsen CA, Christensen R, Bartels EM, Terwee CB, Roos EM. Knee  
42 637 Injury and Osteoarthritis Outcome Score (KOOS): systematic review and meta-analysis  
43 638 of measurement properties. *Osteoarthritis Cartilage*. 2016;24(8):1317-29.  
44  
45 639 29. Wewers ME, Lowe NK. A critical review of visual analogue scales in the  
46 640 measurement of clinical phenomena. *Res Nurs Health*. 1990;13(4):227-36.  
47  
48 641 30. Coffey R, Bordoni B. Lachman Test. *StatPearls*. Treasure Island (FL): StatPearls  
49 642 Publishing  
50 643 Copyright © 2022, StatPearls Publishing LLC.; 2022.  
51  
52 644 31. Engebretsen L, Benum P, Fasting O, Mølster A, Strand T. A prospective,  
53 645 randomized study of three surgical techniques for treatment of acute ruptures of the  
54 646 anterior cruciate ligament. *Am J Sports Med*. 1990;18(6):585-90.  
55  
56 647 32. Grøntvedt T, Engebretsen L, Benum P, Fasting O, Mølster A, Strand T. A  
57 648 prospective, randomized study of three operations for acute rupture of the anterior  
58 649 cruciate ligament. Five-year follow-up of one hundred and thirty-one patients. *J Bone*



- 1  
2  
3 650 Joint Surg Am. 1996;78(2):159-68.  
4  
5 651 33. Noyes FR. The function of the human anterior cruciate ligament and analysis of  
6 652 single- and double-bundle graft reconstructions. Sports Health. 2009;1(1):66-75.  
7 653 34. Ardern CL, Webster KE, Taylor NF, Feller JA. Return to sport following anterior  
8 654 cruciate ligament reconstruction surgery: a systematic review and meta-analysis of the  
9 655 state of play. Br J Sports Med. 2011;45(7):596-606.  
11 656 35. Claes S, Verdonk P, Forsyth R, Bellemans J. The "ligamentization" process in  
12 657 anterior cruciate ligament reconstruction: what happens to the human graft? A  
13 658 systematic review of the literature. Am J Sports Med. 2011;39(11):2476-83.  
15 659 36. Wright RW, Gill CS, Chen L, Brophy RH, Matava MJ, Smith MV, et al. Outcome  
16 660 of revision anterior cruciate ligament reconstruction: a systematic review. J Bone Joint  
17 661 Surg Am. 2012;94(6):531-6.  
19 662 37. Smith PA, Bozynski CC, Kuroki K, Henrich SM, Wijdicks CA, Cook JL. Intra-  
20 663 Articular Biocompatibility of Multistranded, Long-Chain Polyethylene Suture Tape in  
21 664 a Canine ACL Model. J Knee Surg. 2019;32(6):525-31.  
23 665 38. Bachmaier S, Smith PA, Argintar EH, Chahla J, Higgins LD, Wijdicks CA.  
24 666 Independent Suture Augmentation With All-Inside Anterior Cruciate Ligament  
25 667 Reconstruction Reduces Peak Loads on Soft-Tissue Graft. A Biomechanical Full-  
26 668 Construct Study. Arthroscopy. 2022;38(1):88-98.  
28 669 39. C EAM, Huntington LS, Tulloch S. Suture Tape Augmentation of Anterior  
29 670 Cruciate Ligament Reconstruction increases biomechanical stability: A Scoping  
30 671 Review of Biomechanical, Animal, and Clinical Studies. Arthroscopy. 2022.

32 672  
33 673  
34 674  
35 675  
36 676  
37 677  
38 678 **Fig.1** Study Flow Diagram.

40 679  
41 680 **Fig.2** A and B are the models of the control group and test group, respectively. C and  
42 681 D are the pictures of the control group and test group after intraoperative arthroscopic  
43 682 ACL reconstruction, respectively.



1  
2  
3  
4  
5  
6  
7  
8  
9  
10  
11  
12  
13  
14  
15  
16  
17  
18  
19  
20  
21  
22  
23  
24  
25  
26  
27  
28  
29  
30  
31  
32  
33  
34  
35  
36  
37  
38  
39  
40  
41  
42  
43  
44  
45  
46  
47  
48  
49  
50  
51  
52  
53  
54  
55  
56  
57  
58  
59  
60

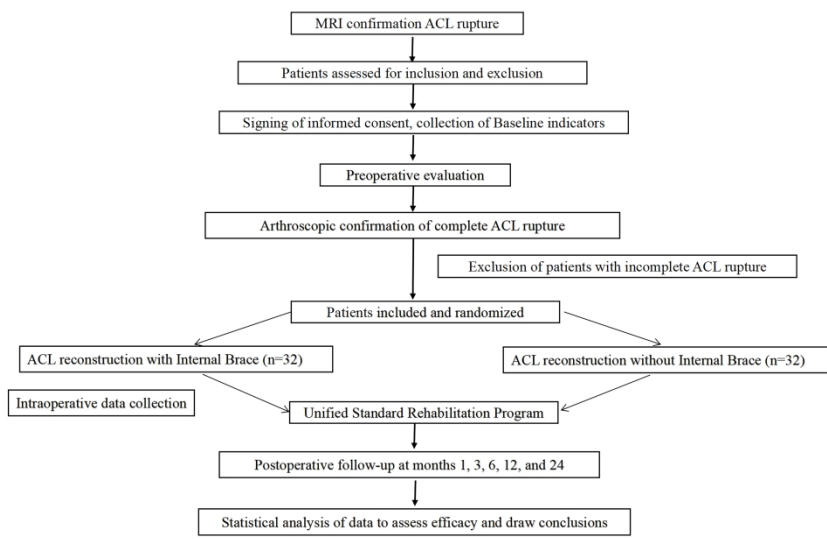

Study Flow Diagram.

862x485mm (157 x 157 DPI)

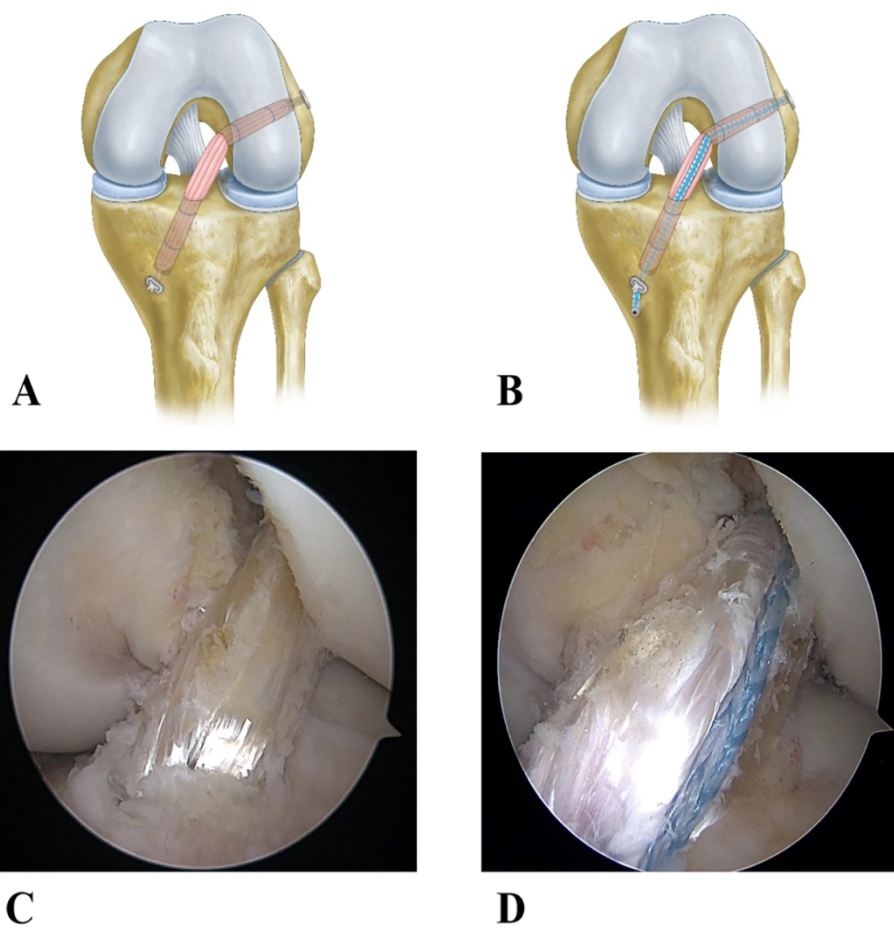

A and B are the models of the control group and test group, respectively. C and D are the pictures of the control group and test group after intraoperative arthroscopic ACL reconstruction, respectively.

253x253mm (138 x 138 DPI)

# Reporting checklist for protocol of a clinical trial.

Based on the SPIRIT guidelines.

## Instructions to authors

Complete this checklist by entering the page numbers from your manuscript where readers will find each of the items listed below.

Your article may not currently address all the items on the checklist. Please modify your text to include the missing information. If you are certain that an item does not apply, please write "n/a" and provide a short explanation.

Upload your completed checklist as an extra file when you submit to a journal.

In your methods section, say that you used the SPIRIT reporting guidelines, and cite them as:

Chan A-W, Tetzlaff JM, Gøtzsche PC, Altman DG, Mann H, Berlin J, Dickersin K, Hróbjartsson A, Schulz KF, Parulekar WR, Krleža-Jerić K, Laupacis A, Moher D. SPIRIT 2013 Explanation and Elaboration: Guidance for protocols of clinical trials. *BMJ*. 2013;346:e7586

|                                   |                     |                                                                                                              | Page   |
|-----------------------------------|---------------------|--------------------------------------------------------------------------------------------------------------|--------|
|                                   |                     | Reporting Item                                                                                               | Number |
| <b>Administrative information</b> |                     |                                                                                                              |        |
| Title                             | <a href="#">#1</a>  | Descriptive title identifying the study design, population, interventions, and, if applicable, trial acronym | 1      |
| Trial registration                | <a href="#">#2a</a> | Trial identifier and registry name. If not yet registered,                                                   | 2      |

|    |                     |                                                                                 |    |
|----|---------------------|---------------------------------------------------------------------------------|----|
| 1  |                     | name of intended registry                                                       |    |
| 2  |                     |                                                                                 |    |
| 3  |                     |                                                                                 |    |
| 4  | Trial registration: | <a href="#">#2b</a> All items from the World Health Organization Trial          | 2  |
| 5  |                     |                                                                                 |    |
| 6  | data set            | Registration Data Set                                                           |    |
| 7  |                     |                                                                                 |    |
| 8  |                     |                                                                                 |    |
| 9  | Protocol version    | <a href="#">#3</a> Date and version identifier                                  | 4  |
| 10 |                     |                                                                                 |    |
| 11 |                     |                                                                                 |    |
| 12 | Funding             | <a href="#">#4</a> Sources and types of financial, material, and other          | 11 |
| 13 |                     | support                                                                         |    |
| 14 |                     |                                                                                 |    |
| 15 |                     |                                                                                 |    |
| 16 |                     |                                                                                 |    |
| 17 | Roles and           | <a href="#">#5a</a> Names, affiliations, and roles of protocol contributors     | 1  |
| 18 |                     |                                                                                 |    |
| 19 | responsibilities:   |                                                                                 |    |
| 20 |                     |                                                                                 |    |
| 21 | contributorship     |                                                                                 |    |
| 22 |                     |                                                                                 |    |
| 23 |                     |                                                                                 |    |
| 24 |                     |                                                                                 |    |
| 25 | Roles and           | <a href="#">#5b</a> Name and contact information for the trial sponsor          | 11 |
| 26 |                     |                                                                                 |    |
| 27 | responsibilities:   |                                                                                 |    |
| 28 |                     |                                                                                 |    |
| 29 | sponsor contact     |                                                                                 |    |
| 30 |                     |                                                                                 |    |
| 31 | information         |                                                                                 |    |
| 32 |                     |                                                                                 |    |
| 33 |                     |                                                                                 |    |
| 34 |                     |                                                                                 |    |
| 35 | Roles and           | <a href="#">#5c</a> Role of study sponsor and funders, if any, in study design; | 11 |
| 36 |                     | collection, management, analysis, and interpretation of                         |    |
| 37 | responsibilities:   | data; writing of the report; and the decision to submit the                     |    |
| 38 |                     | report for publication, including whether they will have                        |    |
| 39 | sponsor and funder  | ultimate authority over any of these activities                                 |    |
| 40 |                     |                                                                                 |    |
| 41 |                     |                                                                                 |    |
| 42 |                     |                                                                                 |    |
| 43 |                     |                                                                                 |    |
| 44 |                     |                                                                                 |    |
| 45 |                     |                                                                                 |    |
| 46 |                     |                                                                                 |    |
| 47 | Roles and           | <a href="#">#5d</a> Composition, roles, and responsibilities of the             | 11 |
| 48 |                     | coordinating centre, steering committee, endpoint                               |    |
| 49 | responsibilities:   | adjudication committee, data management team, and                               |    |
| 50 |                     | other individuals or groups overseeing the trial, if                            |    |
| 51 | committees          | applicable (see Item 21a for data monitoring committee)                         |    |
| 52 |                     |                                                                                 |    |
| 53 |                     |                                                                                 |    |
| 54 |                     |                                                                                 |    |
| 55 |                     |                                                                                 |    |
| 56 |                     |                                                                                 |    |
| 57 |                     |                                                                                 |    |
| 58 |                     |                                                                                 |    |
| 59 |                     |                                                                                 |    |
| 60 |                     |                                                                                 |    |

1 **Introduction**  
2  
3

4 **Background and** [#6a](#) Description of research question and justification for 3  
5  
6 rationale  
7 undertaking the trial, including summary of relevant  
8 studies (published and unpublished) examining benefits  
9 and harms for each intervention  
10  
11  
12

14 **Background and** [#6b](#) Explanation for choice of comparators 3  
15  
16 rationale: choice of  
17 comparators  
18  
19  
20

22 **Objectives** [#7](#) Specific objectives or hypotheses 3  
23  
24

25 **Trial design** [#8](#) Description of trial design including type of trial (eg, 2  
26 parallel group, crossover, factorial, single group),  
27 allocation ratio, and framework (eg, superiority,  
28 equivalence, non-inferiority, exploratory)  
29  
30  
31  
32  
33

35 **Methods:**  
36

37 **Participants,**  
38  
39 **interventions, and**  
40  
41 **outcomes**  
42  
43

45 **Study setting** [#9](#) Description of study settings (eg, community clinic, 4  
46 academic hospital) and list of countries where data will be  
47 collected. Reference to where list of study sites can be  
48 obtained  
49  
50  
51  
52

54 **Eligibility criteria** [#10](#) Inclusion and exclusion criteria for participants. If 4  
55 applicable, eligibility criteria for study centres and  
56  
57  
58  
59

|    |                      |                                                                                   |     |
|----|----------------------|-----------------------------------------------------------------------------------|-----|
| 1  |                      | individuals who will perform the interventions (eg,                               |     |
| 2  |                      | surgeons, psychotherapists)                                                       |     |
| 3  |                      |                                                                                   |     |
| 4  |                      |                                                                                   |     |
| 5  |                      |                                                                                   |     |
| 6  | Interventions:       | <a href="#">#11a</a> Interventions for each group with sufficient detail to allow | 5-6 |
| 7  |                      |                                                                                   |     |
| 8  | description          | replication, including how and when they will be                                  |     |
| 9  |                      |                                                                                   |     |
| 10 |                      | administered                                                                      |     |
| 11 |                      |                                                                                   |     |
| 12 |                      |                                                                                   |     |
| 13 | Interventions:       | <a href="#">#11b</a> Criteria for discontinuing or modifying allocated            | 5-6 |
| 14 |                      |                                                                                   |     |
| 15 | modifications        | interventions for a given trial participant (eg, drug dose                        |     |
| 16 |                      | change in response to harms, participant request, or                              |     |
| 17 |                      | improving / worsening disease)                                                    |     |
| 18 |                      |                                                                                   |     |
| 19 |                      |                                                                                   |     |
| 20 |                      |                                                                                   |     |
| 21 |                      |                                                                                   |     |
| 22 |                      |                                                                                   |     |
| 23 | Interventions:       | <a href="#">#11c</a> Strategies to improve adherence to intervention protocols,   | 5-6 |
| 24 |                      |                                                                                   |     |
| 25 | adherence            | and any procedures for monitoring adherence (eg, drug                             |     |
| 26 |                      | tablet return; laboratory tests)                                                  |     |
| 27 |                      |                                                                                   |     |
| 28 |                      |                                                                                   |     |
| 29 |                      |                                                                                   |     |
| 30 |                      |                                                                                   |     |
| 31 | Interventions:       | <a href="#">#11d</a> Relevant concomitant care and interventions that are         | 5-6 |
| 32 |                      |                                                                                   |     |
| 33 | concomitant care     | permitted or prohibited during the trial                                          |     |
| 34 |                      |                                                                                   |     |
| 35 |                      |                                                                                   |     |
| 36 | Outcomes             | <a href="#">#12</a> Primary, secondary, and other outcomes, including the         | 6-7 |
| 37 |                      |                                                                                   |     |
| 38 |                      | specific measurement variable (eg, systolic blood                                 |     |
| 39 |                      | pressure), analysis metric (eg, change from baseline, final                       |     |
| 40 |                      | value, time to event), method of aggregation (eg, median,                         |     |
| 41 |                      | proportion), and time point for each outcome. Explanation                         |     |
| 42 |                      | of the clinical relevance of chosen efficacy and harm                             |     |
| 43 |                      | outcomes is strongly recommended                                                  |     |
| 44 |                      |                                                                                   |     |
| 45 |                      |                                                                                   |     |
| 46 |                      |                                                                                   |     |
| 47 |                      |                                                                                   |     |
| 48 |                      |                                                                                   |     |
| 49 |                      |                                                                                   |     |
| 50 |                      |                                                                                   |     |
| 51 |                      |                                                                                   |     |
| 52 |                      |                                                                                   |     |
| 53 | Participant timeline | <a href="#">#13</a> Time schedule of enrolment, interventions (including any      | 6-7 |
| 54 |                      |                                                                                   |     |
| 55 |                      | run-ins and washouts), assessments, and visits for                                |     |
| 56 |                      |                                                                                   |     |
| 57 |                      | participants. A schematic diagram is highly recommended                           |     |
| 58 |                      |                                                                                   |     |
| 59 |                      |                                                                                   |     |
| 60 |                      |                                                                                   |     |



(see Figure)

|    |                           |                      |                                                               |
|----|---------------------------|----------------------|---------------------------------------------------------------|
| 1  |                           |                      |                                                               |
| 2  |                           |                      |                                                               |
| 3  |                           |                      |                                                               |
| 4  | Sample size               | <a href="#">#14</a>  | Estimated number of participants needed to achieve 4          |
| 5  |                           |                      |                                                               |
| 6  |                           |                      | study objectives and how it was determined, including         |
| 7  |                           |                      |                                                               |
| 8  |                           |                      | clinical and statistical assumptions supporting any sample    |
| 9  |                           |                      |                                                               |
| 10 |                           |                      | size calculations                                             |
| 11 |                           |                      |                                                               |
| 12 |                           |                      |                                                               |
| 13 | Recruitment               | <a href="#">#15</a>  | Strategies for achieving adequate participant enrolment to 4  |
| 14 |                           |                      |                                                               |
| 15 |                           |                      |                                                               |
| 16 |                           |                      | reach target sample size                                      |
| 17 |                           |                      |                                                               |
| 18 |                           |                      |                                                               |
| 19 | <b>Methods:</b>           |                      |                                                               |
| 20 |                           |                      |                                                               |
| 21 | <b>Assignment of</b>      |                      |                                                               |
| 22 |                           |                      |                                                               |
| 23 | <b>interventions (for</b> |                      |                                                               |
| 24 |                           |                      |                                                               |
| 25 | <b>controlled trials)</b> |                      |                                                               |
| 26 |                           |                      |                                                               |
| 27 |                           |                      |                                                               |
| 28 |                           |                      |                                                               |
| 29 | Allocation: sequence      | <a href="#">#16a</a> | Method of generating the allocation sequence (eg, 4-5         |
| 30 | generation                |                      |                                                               |
| 31 |                           |                      | computer-generated random numbers), and list of any           |
| 32 |                           |                      |                                                               |
| 33 |                           |                      | factors for stratification. To reduce predictability of a     |
| 34 |                           |                      |                                                               |
| 35 |                           |                      | random sequence, details of any planned restriction (eg,      |
| 36 |                           |                      |                                                               |
| 37 |                           |                      | blocking) should be provided in a separate document that      |
| 38 |                           |                      |                                                               |
| 39 |                           |                      | is unavailable to those who enrol participants or assign      |
| 40 |                           |                      |                                                               |
| 41 |                           |                      | interventions                                                 |
| 42 |                           |                      |                                                               |
| 43 |                           |                      |                                                               |
| 44 |                           |                      |                                                               |
| 45 | Allocation                | <a href="#">#16b</a> | Mechanism of implementing the allocation sequence (eg, 4-5    |
| 46 | concealment               |                      |                                                               |
| 47 |                           |                      | central telephone; sequentially numbered, opaque, sealed      |
| 48 |                           |                      |                                                               |
| 49 | mechanism                 |                      | envelopes), describing any steps to conceal the sequence      |
| 50 |                           |                      |                                                               |
| 51 |                           |                      | until interventions are assigned                              |
| 52 |                           |                      |                                                               |
| 53 |                           |                      |                                                               |
| 54 |                           |                      |                                                               |
| 55 | Allocation:               | <a href="#">#16c</a> | Who will generate the allocation sequence, who will enrol 4-5 |
| 56 | implementation            |                      |                                                               |
| 57 |                           |                      | participants, and who will assign participants to             |
| 58 |                           |                      |                                                               |
| 59 |                           |                      |                                                               |
| 60 |                           |                      |                                                               |

|    |                        |                                                                                 |     |
|----|------------------------|---------------------------------------------------------------------------------|-----|
| 1  |                        | interventions                                                                   |     |
| 2  |                        |                                                                                 |     |
| 3  |                        |                                                                                 |     |
| 4  | Blinding (masking)     | <a href="#">#17a</a> Who will be blinded after assignment to interventions (eg, | 4-5 |
| 5  |                        | trial participants, care providers, outcome assessors, data                     |     |
| 6  |                        | analysts), and how                                                              |     |
| 7  |                        |                                                                                 |     |
| 8  |                        |                                                                                 |     |
| 9  |                        |                                                                                 |     |
| 10 |                        |                                                                                 |     |
| 11 | Blinding (masking):    | <a href="#">#17b</a> If blinded, circumstances under which unblinding is        | 4-5 |
| 12 |                        | emergency                                                                       |     |
| 13 |                        | permissible, and procedure for revealing a participant's                        |     |
| 14 | unblinding             | allocated intervention during the trial                                         |     |
| 15 |                        |                                                                                 |     |
| 16 |                        |                                                                                 |     |
| 17 |                        |                                                                                 |     |
| 18 |                        |                                                                                 |     |
| 19 | <b>Methods: Data</b>   |                                                                                 |     |
| 20 |                        |                                                                                 |     |
| 21 | <b>collection,</b>     |                                                                                 |     |
| 22 |                        |                                                                                 |     |
| 23 | <b>management, and</b> |                                                                                 |     |
| 24 |                        |                                                                                 |     |
| 25 | <b>analysis</b>        |                                                                                 |     |
| 26 |                        |                                                                                 |     |
| 27 |                        |                                                                                 |     |
| 28 |                        |                                                                                 |     |
| 29 | Data collection plan   | <a href="#">#18a</a> Plans for assessment and collection of outcome,            | 7   |
| 30 |                        | baseline, and other trial data, including any related                           |     |
| 31 |                        | processes to promote data quality (eg, duplicate                                |     |
| 32 |                        | measurements, training of assessors) and a description of                       |     |
| 33 |                        | study instruments (eg, questionnaires, laboratory tests)                        |     |
| 34 |                        | along with their reliability and validity, if known. Reference                  |     |
| 35 |                        | to where data collection forms can be found, if not in the                      |     |
| 36 |                        | protocol                                                                        |     |
| 37 |                        |                                                                                 |     |
| 38 |                        |                                                                                 |     |
| 39 |                        |                                                                                 |     |
| 40 |                        |                                                                                 |     |
| 41 |                        |                                                                                 |     |
| 42 |                        |                                                                                 |     |
| 43 |                        |                                                                                 |     |
| 44 |                        |                                                                                 |     |
| 45 |                        |                                                                                 |     |
| 46 |                        |                                                                                 |     |
| 47 |                        |                                                                                 |     |
| 48 | Data collection plan:  | <a href="#">#18b</a> Plans to promote participant retention and complete        | 7   |
| 49 | retention              | follow-up, including list of any outcome data to be                             |     |
| 50 |                        | collected for participants who discontinue or deviate from                      |     |
| 51 |                        | intervention protocols                                                          |     |
| 52 |                        |                                                                                 |     |
| 53 |                        |                                                                                 |     |
| 54 |                        |                                                                                 |     |
| 55 |                        |                                                                                 |     |
| 56 |                        |                                                                                 |     |
| 57 |                        |                                                                                 |     |
| 58 | Data management        | <a href="#">#19</a> Plans for data entry, coding, security, and storage,        | 7   |
| 59 |                        |                                                                                 |     |
| 60 |                        |                                                                                 |     |

including any related processes to promote data quality  
(eg, double data entry; range checks for data values).

Reference to where details of data management  
procedures can be found, if not in the protocol

10 Statistics: outcomes [#20a](#) Statistical methods for analysing primary and secondary 8-9  
11  
12 outcomes. Reference to where other details of the  
13  
14 statistical analysis plan can be found, if not in the protocol

18 Statistics: additional [#20b](#) Methods for any additional analyses (eg, subgroup and 8-9  
19  
20 analyses adjusted analyses)

23 Statistics: analysis [#20c](#) Definition of analysis population relating to protocol non- 8-9  
24  
25 population and adherence (eg, as randomised analysis), and any  
26  
27 missing data statistical methods to handle missing data (eg, multiple  
28  
29 imputation)

### 33 Methods: Monitoring

36 Data monitoring: [#21a](#) Composition of data monitoring committee (DMC); 7  
37  
38 formal committee summary of its role and reporting structure; statement of  
39  
40 whether it is independent from the sponsor and  
41  
42 competing interests; and reference to where further  
43  
44 details about its charter can be found, if not in the  
45  
46 protocol. Alternatively, an explanation of why a DMC is  
47  
48 not needed  
49  
50  
51

53 Data monitoring: [#21b](#) Description of any interim analyses and stopping 7  
54  
55 interim analysis guidelines, including who will have access to these  
56  
57 interim results and make the final decision to terminate  
58  
59

|    |                      |                                                                                 |            |
|----|----------------------|---------------------------------------------------------------------------------|------------|
| 1  |                      | the trial                                                                       |            |
| 2  |                      |                                                                                 |            |
| 3  |                      |                                                                                 |            |
| 4  | Harms                | <a href="#">#22</a> Plans for collecting, assessing, reporting, and managing    | 7          |
| 5  |                      | solicited and spontaneously reported adverse events and                         |            |
| 6  |                      | other unintended effects of trial interventions or trial                        |            |
| 7  |                      | conduct                                                                         |            |
| 8  |                      |                                                                                 |            |
| 9  |                      |                                                                                 |            |
| 10 |                      |                                                                                 |            |
| 11 |                      |                                                                                 |            |
| 12 |                      |                                                                                 |            |
| 13 | Auditing             | <a href="#">#23</a> Frequency and procedures for auditing trial conduct, if     | 7          |
| 14 |                      | any, and whether the process will be independent from                           |            |
| 15 |                      | investigators and the sponsor                                                   |            |
| 16 |                      |                                                                                 |            |
| 17 |                      |                                                                                 |            |
| 18 |                      |                                                                                 |            |
| 19 |                      |                                                                                 |            |
| 20 |                      |                                                                                 |            |
| 21 | <b>Ethics and</b>    |                                                                                 |            |
| 22 | <b>dissemination</b> |                                                                                 |            |
| 23 |                      |                                                                                 |            |
| 24 |                      |                                                                                 |            |
| 25 |                      |                                                                                 |            |
| 26 | Research ethics      | <a href="#">#24</a> Plans for seeking research ethics committee / institutional | 10         |
| 27 | approval             | review board (REC / IRB) approval                                               |            |
| 28 |                      |                                                                                 |            |
| 29 |                      |                                                                                 |            |
| 30 |                      |                                                                                 |            |
| 31 | Protocol             | <a href="#">#25</a> Plans for communicating important protocol modifications    | 10         |
| 32 | amendments           | (eg, changes to eligibility criteria, outcomes, analyses) to                    |            |
| 33 |                      | relevant parties (eg, investigators, REC / IRBs, trial                          |            |
| 34 |                      | participants, trial registries, journals, regulators)                           |            |
| 35 |                      |                                                                                 |            |
| 36 |                      |                                                                                 |            |
| 37 |                      |                                                                                 |            |
| 38 |                      |                                                                                 |            |
| 39 |                      |                                                                                 |            |
| 40 |                      |                                                                                 |            |
| 41 | Consent or assent    | <a href="#">#26a</a> Who will obtain informed consent or assent from potential  | 10         |
| 42 |                      | trial participants or authorised surrogates, and how (see                       |            |
| 43 |                      | Item 32)                                                                        |            |
| 44 |                      |                                                                                 |            |
| 45 |                      |                                                                                 |            |
| 46 |                      |                                                                                 |            |
| 47 |                      |                                                                                 |            |
| 48 |                      |                                                                                 |            |
| 49 | Consent or assent:   | <a href="#">#26b</a> Additional consent provisions for collection and use of    | Not        |
| 50 | ancillary studies    | participant data and biological specimens in ancillary                          | applicable |
| 51 |                      | studies, if applicable                                                          |            |
| 52 |                      |                                                                                 |            |
| 53 |                      |                                                                                 |            |
| 54 |                      |                                                                                 |            |
| 55 |                      |                                                                                 |            |
| 56 |                      |                                                                                 |            |
| 57 | Confidentiality      | <a href="#">#27</a> How personal information about potential and enrolled       | 7          |
| 58 |                      |                                                                                 |            |
| 59 |                      |                                                                                 |            |
| 60 |                      |                                                                                 |            |

participants will be collected, shared, and maintained in order to protect confidentiality before, during, and after the trial

|    |                       |                      |                                                                |
|----|-----------------------|----------------------|----------------------------------------------------------------|
| 1  |                       |                      |                                                                |
| 2  |                       |                      |                                                                |
| 3  |                       |                      |                                                                |
| 4  |                       |                      |                                                                |
| 5  |                       |                      |                                                                |
| 6  |                       |                      |                                                                |
| 7  |                       |                      |                                                                |
| 8  | Declaration of        | <a href="#">#28</a>  | Financial and other competing interests for principal          |
| 9  |                       |                      |                                                                |
| 10 | interests             |                      | investigators for the overall trial and each study site        |
| 11 |                       |                      |                                                                |
| 12 |                       |                      |                                                                |
| 13 | Data access           | <a href="#">#29</a>  | Statement of who will have access to the final trial           |
| 14 |                       |                      |                                                                |
| 15 |                       |                      | dataset, and disclosure of contractual agreements that         |
| 16 |                       |                      |                                                                |
| 17 |                       |                      | limit such access for investigators                            |
| 18 |                       |                      |                                                                |
| 19 |                       |                      |                                                                |
| 20 |                       |                      |                                                                |
| 21 | Ancillary and post    | <a href="#">#30</a>  | Provisions, if any, for ancillary and post-trial care, and for |
| 22 |                       |                      |                                                                |
| 23 | trial care            |                      | compensation to those who suffer harm from trial               |
| 24 |                       |                      |                                                                |
| 25 |                       |                      | participation                                                  |
| 26 |                       |                      |                                                                |
| 27 |                       |                      |                                                                |
| 28 | Dissemination policy: | <a href="#">#31a</a> | Plans for investigators and sponsor to communicate trial       |
| 29 |                       |                      |                                                                |
| 30 | trial results         |                      | results to participants, healthcare professionals, the         |
| 31 |                       |                      |                                                                |
| 32 |                       |                      | public, and other relevant groups (eg, via publication,        |
| 33 |                       |                      |                                                                |
| 34 |                       |                      | reporting in results databases, or other data sharing          |
| 35 |                       |                      |                                                                |
| 36 |                       |                      | arrangements), including any publication restrictions          |
| 37 |                       |                      |                                                                |
| 38 |                       |                      |                                                                |
| 39 |                       |                      |                                                                |
| 40 |                       |                      |                                                                |
| 41 | Dissemination policy: | <a href="#">#31b</a> | Authorship eligibility guidelines and any intended use of      |
| 42 |                       |                      |                                                                |
| 43 | authorship            |                      | professional writers                                           |
| 44 |                       |                      |                                                                |
| 45 |                       |                      |                                                                |
| 46 | Dissemination policy: | <a href="#">#31c</a> | Plans, if any, for granting public access to the full          |
| 47 |                       |                      |                                                                |
| 48 | reproducible          |                      | protocol, participant-level dataset, and statistical code      |
| 49 |                       |                      |                                                                |
| 50 |                       |                      |                                                                |
| 51 | research              |                      |                                                                |
| 52 |                       |                      |                                                                |
| 53 |                       |                      |                                                                |
| 54 | <b>Appendices</b>     |                      |                                                                |
| 55 |                       |                      |                                                                |
| 56 |                       |                      |                                                                |
| 57 | Informed consent      | <a href="#">#32</a>  | Model consent form and other related documentation             |
| 58 |                       |                      |                                                                |
| 59 |                       |                      |                                                                |
| 60 |                       |                      |                                                                |

1 materials given to participants and authorised surrogates  
2  
3  
4 Biological specimens [#33](#) Plans for collection, laboratory evaluation, and storage of Not  
5  
6 biological specimens for genetic or molecular analysis in applicable  
7  
8 the current trial and for future use in ancillary studies, if  
9  
10 applicable  
11  
12

13 None The SPIRIT Explanation and Elaboration paper is distributed under the terms of the Creative  
14 Commons Attribution License CC-BY-NC. This checklist can be completed online using  
15  
16 <https://www.goodreports.org/>, a tool made by the [EQUATOR Network](#) in collaboration with  
17  
18 [Penelope.ai](#)  
19  
20  
21  
22  
23  
24  
25  
26  
27  
28  
29  
30  
31  
32  
33  
34  
35  
36  
37  
38  
39  
40  
41  
42  
43  
44  
45  
46  
47  
48  
49  
50  
51  
52  
53  
54  
55  
56  
57  
58  
59  
60



# BMJ Open

## Internal brace augmentation reconstruction VS standard anterior cruciate ligament reconstruction:A randomized controlled clinical trial study protocol.

|                                 |                                                                                                                                                                                                                                                                                                                                                                                                                                                                                                                                                                                                                                                                                                                                                                                                                                                  |
|---------------------------------|--------------------------------------------------------------------------------------------------------------------------------------------------------------------------------------------------------------------------------------------------------------------------------------------------------------------------------------------------------------------------------------------------------------------------------------------------------------------------------------------------------------------------------------------------------------------------------------------------------------------------------------------------------------------------------------------------------------------------------------------------------------------------------------------------------------------------------------------------|
| Journal:                        | <i>BMJ Open</i>                                                                                                                                                                                                                                                                                                                                                                                                                                                                                                                                                                                                                                                                                                                                                                                                                                  |
| Manuscript ID                   | bmjopen-2022-065254.R1                                                                                                                                                                                                                                                                                                                                                                                                                                                                                                                                                                                                                                                                                                                                                                                                                           |
| Article Type:                   | Protocol                                                                                                                                                                                                                                                                                                                                                                                                                                                                                                                                                                                                                                                                                                                                                                                                                                         |
| Date Submitted by the Author:   | 10-Jul-2023                                                                                                                                                                                                                                                                                                                                                                                                                                                                                                                                                                                                                                                                                                                                                                                                                                      |
| Complete List of Authors:       | Lu, Wenhao; Xiangya Hospital Central South University, Department of Orthopaedics<br>Liu, Di; Xiangya Hospital Central South University, Department of Orthopaedics<br>Cai, Zijun; Xiangya Hospital Central South University, Department of Orthopaedics<br>Pan, Linyuan; Xiangya Hospital Central South University, Department of Orthopaedics<br>Xie, Wenqing; Xiangya Hospital Central South University, Department of Orthopaedics<br>Jin, Hongfu; Xiangya Hospital Central South University, Department of Orthopaedics<br>Liu, Xu; Xiangya Hospital Central South University, Department of Orthopaedics<br>Li, Yusheng; Xiangya Hospital Central South University, Department of Orthopaedics; Central South University<br>Xiao, Wenfeng; Xiangya Hospital Central South University, Department of Orthopaedics; Central South University |
| <b>Primary Subject Heading</b>: | Sports and exercise medicine                                                                                                                                                                                                                                                                                                                                                                                                                                                                                                                                                                                                                                                                                                                                                                                                                     |
| Secondary Subject Heading:      | Surgery                                                                                                                                                                                                                                                                                                                                                                                                                                                                                                                                                                                                                                                                                                                                                                                                                                          |
| Keywords:                       | Knee < ORTHOPAEDIC & TRAUMA SURGERY, Orthopaedic sports trauma < ORTHOPAEDIC & TRAUMA SURGERY, Orthopaedic & trauma surgery < SURGERY, Clinical trials < THERAPEUTICS, Adult orthopaedics < ORTHOPAEDIC & TRAUMA SURGERY                                                                                                                                                                                                                                                                                                                                                                                                                                                                                                                                                                                                                         |
|                                 |                                                                                                                                                                                                                                                                                                                                                                                                                                                                                                                                                                                                                                                                                                                                                                                                                                                  |

SCHOLARONE™  
Manuscripts

# 1 Internal brace augmentation reconstruction VS 2 standard anterior cruciate ligament reconstruction : 3 A randomized controlled clinical trial study protocol.

4  
5 Wenhao Lu<sup>1,2</sup>, Di Liu<sup>1,2</sup>, Zijun Cai<sup>1,2</sup>, Linyuan Pan<sup>1,2</sup>, Wenqing Xie<sup>1,2</sup>, Hongfu Jin<sup>1,2</sup>,  
6 Xu Liu<sup>1,2</sup>, Yusheng Li<sup>1,2,\*</sup>, Wenfeng Xiao<sup>1,2,\*</sup>.

7  
8 <sup>1</sup> Department of Orthopaedics, Xiangya Hospital, Central South University, Changsha  
9 410008, Hunan, China.

10 <sup>2</sup> National Clinical Research Center for Geriatric Disorders, Xiangya Hospital, Central  
11 South University, Changsha 410008, Hunan, China.

12  
13 \* Correspondence to:

14 Dr. Wenfeng Xiao, Department of Orthopaedics, Xiangya Hospital, Central South  
15 University, 87 Xiangya Road, Changsha 410008, Hunan, China. (E-Mail:  
16 xiaowenfeng@csu.edu.cn); Dr. Yusheng Li, Department of Orthopaedics, Xiangya  
17 Hospital, Central South University, 87 Xiangya Road, Changsha 410008, Hunan,  
18 China. (E-Mail: [liyusheng@csu.edu.cn](mailto:liyusheng@csu.edu.cn)).

## 19 20 **Abstract:**

21 **Introduction:** Anterior cruciate ligament (ACL) rupture is one of the most common  
22 knee injuries in sports, and the gold standard for treating ACL rupture is tendon graft  
23 reconstruction. Recently, internal brace technology has been gradually applied to  
24 ligament repair, but there is still need to be more relevant in vivo clinical evidence for  
25 using internal brace technology in ACL reconstruction (ACLR). We conducted a  
26 randomized controlled trial to investigate the clinical efficacy of internal brace  
27 technology in ACLR.

28 **Methods and analysis:** This is a randomized, parallel controlled trial of patients with  
29 ACL rupture who underwent inpatient surgery at the Department of Orthopedics,  
30 Xiangya Hospital, Central South University. All study subjects were assigned to the  
31 test and control groups according to the random number table method. The test group  
32 underwent ACLR using the internal brace technique, and the control group underwent  
33 standard ACLR, with uniform postoperative rehabilitation in both groups. Patient-  
34 reported outcomes were preoperative baseline and postoperative recovery at 1, 3, 6, 12,  
35 and 24 months. The primary outcome was International Knee Documentation  
36 Committee (IKDC) function from baseline (ACL rupture) to 6 months postoperatively.  
37 Secondary outcomes included (I) other patient outcome reporting metrics, the Lysholm  
38 knee score (LKS), the Knee Injury and Osteoarthritis Outcome Score (KOOS), and the  
39 Visual Analog Scale (VAS), (II) the use of the Kneelax3 knee stabilizer to assess knee

1  
2  
3 40 stability, (III) the occurrence of adverse events, such as graft refraction or symptomatic  
4 41 instability, postoperative infection, and contralateral injury, and (IV) magnetic  
5 42 resonance images at 12 and 24 months after ACLR.

7 43 **Ethics and dissemination:** This trial was approved by the Medical Ethics Committee  
8 44 of Xiangya Hospital of Central South University on October 26, 2021. Data will be  
9 45 published in peer-reviewed journals and presented at national and international  
11 46 conferences.

12 47 **Trial registration number:** ChiCTR2200057526.

#### 14 48 **Strengths and limitations of this study:**

- 16 49 • This study aims to demonstrate the clinical superiority of the Internal brace compared  
17 50 to conventional ACL reconstruction (ACLR) through a 2-year follow-up period.
- 19 51 • This study will fill an existing gap regarding the efficacy of the internal brace in ACL  
20 52 reconstruction by providing robust and high-quality evidence on its role and impact.
- 22 53 • The study has a standard and detailed rehabilitation program to ensure a smooth  
23 54 recovery after ACLR.
- 25 55 • This trial was conducted in a single centre, and data lacked generalizability.

#### 27 56 **Keywords:**

28 57 Anterior cruciate ligament (ACL), Anterior cruciate ligament reconstruction (ACLR),  
29 58 Internal brace, Study protocol.

## 31 59 **Introduction**

33 60 A 41-year-old miner successfully performed the world's first ACL repair surgery, and  
34 61 the function of the knee joint was very good after surgery<sup>1</sup>. ACL rupture is one of the  
35 62 most common ligament injuries in the knee, mainly in young people who participate in  
36 63 sports. If not actively treated after injury, joint instability and other phenomena often  
37 64 occur, reducing the quality of life and increasing the risk of osteoarthritis<sup>2-4</sup>. Over the  
38 65 past few decades, ACL ruptures have been estimated at approximately 30 to 52 cases  
39 66 per 100,000 person-years<sup>5</sup>. ACL injuries occur in more than 175,000 people in the  
40 67 United States annually, and approximately 100,000 undergo surgery<sup>6-8</sup>. With the  
41 68 continuous development of surgical techniques, the current mainstream surgical  
42 69 method is to perform ACLR under arthroscopy<sup>9</sup>. In recent years, a Japanese study found  
43 70 that for rugby players under the age of 20 after ACLR, the re-disruption rate of ACLR  
44 71 grafts after returning to the field was 23%<sup>10</sup>. At the same time, other studies have also  
45 72 shown that the revision rate of ACLR with an allogeneic tendon in adolescents can  
46 73 reach 35%<sup>11</sup>; however, the effect after revision is not as good as that of primary ACLR<sup>12</sup>.

48 74 Internal brace technology was promoted in 2010, which uses braided ultrahigh  
49 75 molecular weight polyethylene (UHMWPE) polyester suture tape and knotless bone  
50 76 anchors to reinforce ligament strength, also known as an auxiliary stabilizing structure  
51 77 for recovery of motion after ligament repair, which helps prevent secondary damage,  
52 78 <sup>13</sup>such as anterior and posterior cruciate ligament, medial and lateral collateral ligament  
53 79 repair of the knee<sup>13-15</sup>, and ankle and elbow ligament strengthening repair<sup>16 17</sup>. Enhanced  
54 80 collateral ligament repair and reconstruction with an internal brace improve limb  
55 81 biomechanics, including greater stiffness and maximum load, while facilitating early

1  
2  
3 82 rehabilitation in the motor and biomechanical environment<sup>12 14</sup>. Reinforced ligament  
4 83 repair offers unique advantages over traditional reconstruction techniques, including  
5 84 smaller bores and implants, no risk of disease transmission from allografts, and no risk  
6 85 of tunnel convergence during the procedure<sup>14 18 19</sup>. Therefore, ACL reinforcement is an  
7 86 alternative method for supporting ACL grafts synergistically, load-sharing manner with  
8 87 primary tension on the graft and high-strength suture tape.

9  
10  
11 88 In the case of ACLR, the internal brace ligament augmentation technique helps prevent  
12 89 various failure scenarios, including creep and irreversible stretching, traumatic tears,  
13 90 and slippage of the tendon-bone interface<sup>20 21</sup>. In addition, these failures can be avoided  
14 91 when the graft is small or vulnerable<sup>20 21</sup>. In 2018, in an in vitro trial, Dr Pat Smith  
15 92 found that ACLR combined with independent suture tape significantly reduced graft  
16 93 elongation and allowed the grafted ligaments to accept higher ultimate disruption loads,  
17 94 thereby reducing the risk of re-rupture of the graft<sup>20</sup>. Preliminary short-term studies  
18 95 have shown that using the internal brace technique can significantly improve functional  
19 96 recovery after ACLR and improve patient quality of life. However, only a few medical  
20 97 institutions use ACLR combined with the internal brace technique, and there needs to  
21 98 be more relevant in vivo clinical evidence.

22  
23  
24 99 This study will fill this gap by exploring whether internal brace technology can improve  
25 100 the outcome of patients with ligament injuries and provide a new option for patients  
26 101 with ACL injuries.

## 27 28 102 **Methods and analysis**

### 29 30 103 **Study setting**

31  
32 104 This was a randomized parallel-controlled trial conducted under the guidance of the  
33 105 CONSORT statement<sup>22</sup> and included patients with ACL rupture who were hospitalized  
34 106 in the Department of Orthopedics at Xiangya Hospital of Central South University from  
35 107 01/03/2022 to 28/02/2023. The Medical Ethics Committee of Xiangya Hospital of  
36 108 Central South University approved the ethical application related to this study and has  
37 109 filed it (ethical approval number: 202110478). All subjects signed the informed consent  
38 110 form before the operations.

### 39 40 111 **Eligibility criteria**

41  
42 112 The inclusion criteria are as follows: (1) age of 16-45 years; (2) unilateral knee MRI  
43 113 showing unilateral knee ACL fracture; (3) combined meniscal injury that does not  
44 114 interfere with the standard postoperative rehabilitation program after intraoperative  
45 115 management; (4) combined grade III or lower cartilage injury that does not interfere  
46 116 with the standard postoperative rehabilitation program; (5) meet the 24 months of  
47 117 follow-up; (6) no previous injury to the healthy knee; (7) informed consent of the  
48 118 subject and signing of relevant documents.

49  
50  
51 119 The exclusion criteria are as follows: (1) age of <16 years or >45 years; (2) previous  
52 120 ACLR or bilateral ACL injury; (3) MRI revealed posterior cruciate ligament (PCL),  
53 121 medial collateral ligament (MCL), or lateral collateral ligament (LCL) injury; (4) grade  
54 122 IV cartilage injury or unstable longitudinal meniscus tear requiring repair that interferes  
55 123 with standard rehabilitation protocols after surgical management; (5) patients who  
56 124 cannot meet 24 follow-up visits; (6) patients with severe underlying medical conditions  
57 125 that make surgery inadvisable, or patients with mental illness, pregnancy during  
58 126 planned trials, or other conditions that are not conducive to late follow-up.

## 127 **Participant selection:**

128 Patients diagnosed with ACL rupture by clinicians through physical examination and  
129 MRI imaging evaluation were randomly allocated to the trial and control groups after  
130 final confirmation of ACL rupture under arthroscopy and agreeing to participate in this  
131 study. The trial group was reconstructed using ACLR with the internal brace technique,  
132 and the control group was reconstructed using ACLR without the internal brace  
133 technique. Preoperative assessment of patients was performed before surgery, and a  
134 uniform rehabilitation program was performed after surgery. The protocol (version 1.0,  
135 March 2022) inclusion start date was March 2022, with an expected cutoff date of  
136 March 2023. The follow-up period is 2 years, with the last follow-up expected in March  
137 2025 (the exact end date is based on the inclusion of the last subject), and the specific  
138 technical route is shown in **Fig. 1**.

## 139 **Study sample**

140 IKDC score consists of three aspects: 1) symptoms, including pain, stiffness, swelling,  
141 interlocking/jamming, and softening legs; 2) motion and daily activities; and 3) Current  
142 knee function, but knee function prior to knee injury does not count towards the total  
143 score, which is the main outcome indicator of this study, based on which the sample  
144 size required for this trial was estimated. IKDC scores are continuous measurement  
145 data, and this study compares statistical differences between the means  $\pm$  standard  
146 deviations of the two groups. The minimum clinically important difference (MCID) of  
147 the IKDC scale was reported to be between 8.8 and 15.6<sup>23-25</sup>, we set  $\delta$  to 10, and the  
148 overall sample standard deviation was set to 13 based on the relevant literature<sup>23-25</sup>. To  
149 satisfy the power of a test ( $1-\beta$ ,  $\beta$  means type II error) of 0.8 and the test level  $\alpha$  (type I  
150 error) of 0.05, the sample size calculated for each group was 27 according to the  
151 following formula, and considering a 20% lost visit rate, 33 patients were included in  
152 each group with a total of 66 patients included.

## 153 **Randomization and Concealed Grouping**

154 Using a computer-generated random number list, all eligible subjects were randomly  
155 assigned in a 1:1 ratio to the ACLR the endoprosthesis technique group (combined  
156 group, n=33) and the standard ACL reconstruction group (simple group, n=33) after  
157 screening by inclusion and exclusion criteria, with no restrictions on either study group.  
158 Randomization was carried out by an investigator who was not further involved in the  
159 study. The allocation results were sealed in opaque envelopes and kept by the study  
160 coordinator. On the day of surgery, one envelope per patient was given to the surgeon  
161 by the study coordinator. Subjects and physicians included in the study were informed  
162 of the grouping, but neither the rehabilitators who instructed the patients on  
163 rehabilitation nor the data collectors who conducted the follow-up visits were aware of  
164 the grouping of the patients.

## 165 **Interventions and surgical techniques**

166 In all cases, all inside ACLR was performed using autologous semitendinosus tendons  
167 with the arthroscopy. Semitendinosus tendons were braided with sutures (0 FiberWire  
168 Suture, Arthrex) to form four strands of ACL grafts (all between 7.5 and 10 mm in  
169 diameter, supplemented with semimembranous tendons less than 7.5 mm in diameter).  
170 In the ACLR group, the braided graft femoral end and tibial segment were suspended  
171 and fixed with a TightRope (ACL TightRope RT Implant, Arthrex), and in the ACLR



172 with internal brace group, a separate wire tape (2 mm FiberTape, Arthrex) was added  
 173 to the ACLR group. The suture was fixed with a knotless bone anchor (4.75-mm PEEK  
 174 SwiveLock, Arthrex) distally and a TightRope suspension proximally as in the graft—  
 175 fig. 2.

176 The procedure was as follows: the patient was anaesthetized, a tourniquet was applied  
 177 to the affected limb, routine surgical disinfection of the knee was performed, a sterile  
 178 surgical sheet was placed, the semitendinosus tendon was palpated, a straight incision  
 179 was made medial to the tibial tuberosity, the semitendinosus tendon was removed with  
 180 a tendon extractor, 10 ml of ropivacaine was injected at the tendon extraction site, and  
 181 then, the removed semitendinosus tendon was braided into 4 strands using the  
 182 GraftLink (Arthrex) technique<sup>26</sup>. A conventional knee arthroscopic approach was  
 183 performed on the anteromedial and anterolateral sides of the affected knee to explore  
 184 the injured structures and remove the remaining portion of the ACL. The knee was  
 185 flexed to the extreme, and the femoral tract was created at the footprint of the ACL stop  
 186 at the lateral femoral condyle and the tibial tract at the footprint of the ACL start. The  
 187 graft and two TightRope titanium plates were pulled into the knee cavity and pulled out  
 188 through the femoral and tibial tracts, respectively. The tabs were flipped, the tab rings  
 189 were tightened, and the titanium plates were fixed. In the ACLR with an internal brace  
 190 group, the femoral end of the FiberTape wire band was fixed with a TightRope ring,  
 191 the wire band was tensioned in the extended position, and the tibial end was fixed  
 192 independently with a knotless bone anchor (4.75-mm PEEK SwiveLock, Arthrex).

193 All patients received a uniform training and rehabilitation program after surgery, and  
 194 the entire rehabilitation process was divided into 7 phases. The first 3 phases focused  
 195 on controlling swelling and restoring range of motion, which usually required 4 weeks.  
 196 A detailed rehabilitation plan can be found in **Table 1**. Phases 4-5 focused on restoring  
 197 quadriceps muscle strength control and balance and core strength restoration training,  
 198 and phases 6-7 were gradually resumption of various sports activities, from daily  
 199 activities to professional activities or contact sports. A detailed rehabilitation plan can  
 200 be found in **Table 2** and **Table 3**.

201 **Table 1. Phases 1-3 of the post-ACLR rehabilitation program**

| Phase                          | Movement Exercises                                                                                                                                                                                                                                                                                                                                                                                                                                                                                                                                                                                                                                                                                                                                                        | Gait Exercises                                                                                                                                           | Manipulative Massage                                                                                                                                                   | Rehabilitation Goals                                                                                                                                                                                            | Precautions                                                                                                                                                                                                    |
|--------------------------------|---------------------------------------------------------------------------------------------------------------------------------------------------------------------------------------------------------------------------------------------------------------------------------------------------------------------------------------------------------------------------------------------------------------------------------------------------------------------------------------------------------------------------------------------------------------------------------------------------------------------------------------------------------------------------------------------------------------------------------------------------------------------------|----------------------------------------------------------------------------------------------------------------------------------------------------------|------------------------------------------------------------------------------------------------------------------------------------------------------------------------|-----------------------------------------------------------------------------------------------------------------------------------------------------------------------------------------------------------------|----------------------------------------------------------------------------------------------------------------------------------------------------------------------------------------------------------------|
| <b>Phase 1 (within 1 week)</b> | (1) Bed heel against the bed for flexion and extension sliding; supine position, the affected leg bends the hip, flexes the knee and places the heel on the wall for flexion and extension sliding; sitting position, legs on the floor; the healthy leg is placed in front of the affected leg and assists the affected leg in flexing the knee.<br>(2) Ankle pump exercises (the affected leg is elevated, and the foot performs upward hooking and downward stepping movements, and rotational movements).<br>(3) Anterior thigh muscle tensing exercises with the knee in the straight position (can be combined with neuromuscular electrical stimulation or biofeedback exercises).<br>(4) Hip muscle group training.<br>(5) Pillow clamping of the legs for medial | (1) Flat and step gait training with the support of a knee protection brace and double crutches.<br>(2) Cold compresses after training to reduce oedema. | (1) Push the patella in all directions.<br>(2) Manipulation of the posterior thigh muscles of the affected limb or sitting and standing to pull the muscles to relieve | Active mobility of the knee joint reaches 0° to 90°.<br>(1) The anterolateral thigh muscles can be tightened better.<br>(2) The affected limb can be fully weight-bearing with the help of braces and crutches. | (1) Brace locked in 0° position, crutches, and weight-bearing exercises within a tolerable range.<br>(2) Wear the brace at night and lock it in the 0° position while sleeping with the affected leg elevated. |

|                            |                                                                                                                                                                                                                                                                                                                                                                                                                                                                                                                                                                                                                                                                                                                                                                                                                                                                                                            |                                                                                                                                                                                                                |                                                                                                                                                                                 |                                                                                                                                                                                                                                              |                                                                                                                                                                                                                                                                                                                                                                                             |
|----------------------------|------------------------------------------------------------------------------------------------------------------------------------------------------------------------------------------------------------------------------------------------------------------------------------------------------------------------------------------------------------------------------------------------------------------------------------------------------------------------------------------------------------------------------------------------------------------------------------------------------------------------------------------------------------------------------------------------------------------------------------------------------------------------------------------------------------------------------------------------------------------------------------------------------------|----------------------------------------------------------------------------------------------------------------------------------------------------------------------------------------------------------------|---------------------------------------------------------------------------------------------------------------------------------------------------------------------------------|----------------------------------------------------------------------------------------------------------------------------------------------------------------------------------------------------------------------------------------------|---------------------------------------------------------------------------------------------------------------------------------------------------------------------------------------------------------------------------------------------------------------------------------------------------------------------------------------------------------------------------------------------|
|                            | <p>thigh muscle group strength training.</p> <p>(6) The brace is locked in the 0° position, and the affected leg is lifted in the supine, prone and prone positions for muscle strength training.</p> <p>(7) Passive knee extension exercises: prone position with the affected knee extended out of bed for suspension or supine position with the affected leg in a slightly elevated heel position and the knee joint suspended.</p> <p>(8) weight transfer training (front-to-back and left-to-right) can be performed in the above weight-bearing exercise position.</p> <p>(9) Continuous passive movement apparatus training with increased knee flexion by 5°to 10°/day.</p>                                                                                                                                                                                                                       |                                                                                                                                                                                                                | <p>their spasm.</p>                                                                                                                                                             | <p>(3) Edema control is good.</p> <p>(4) Good wound healing.</p>                                                                                                                                                                             |                                                                                                                                                                                                                                                                                                                                                                                             |
| <b>Phase 2 (1-2 weeks)</b> | <p>(1) Fixed cycling exercises (from small to a full range of pedal rotation).</p> <p>(2) Tightening and 90° muscle strength exercises for the anterior thigh muscles in the straight position.</p> <p>(3) Standing balance training on the affected leg with a single leg wearing a support.</p> <p>(4) Balance training on a balance board with forward and backward weight transfer.</p> <p>(5) Continuous passive activity equipment training.</p> <p>(6) Start small partial weight-bearing squat exercises (within 30° of knee flexion).</p> <p>(7) Passive straightening exercises with the heel slightly elevated and the knee hanging in the air.</p> <p>(8) Straight leg raises training (all directions).</p> <p>(9) Terminal angle knee extension training in the standing position using an elastic band.</p>                                                                                 | <p>(1) The healthy leg stands outside the treadmill with weight, and the affected leg simulates walking on the treadmill.</p> <p>(2) The affected leg crosses the obstacle training and simulates walking.</p> | <p>(1) Manipulation to push the patella treatment.</p> <p>(2) Manipulation of the posterior thigh muscle group for relaxation and stretching exercises.</p>                     | <p>The active mobility of the knee joint reaches 0°to 120°.</p> <p>(1) Straight leg elevation; anterior thigh muscles can be tightened with force.</p> <p>(2) the patient can walk normally with crutches with a nonlocking brace.</p>       | <p>(1) Weight-bearing exercises within tolerable limits.</p> <p>(2) Transition from double to single crutch.</p> <p>(3) When the strength of the anterior thigh muscle group is well exercised, the locking brace can be gradually dispensed (the anterior thigh muscle group can be unlocked to more than 30° only when it can contract forcefully to keep the straight leg elevated).</p> |
| <b>Phase 3 (2-4 weeks)</b> | <p>(1) Fixed bicycle training gradually increases the resistance to improve exercise endurance.</p> <p>(2) Tightening exercises for the anterior thigh muscle group in the straight position and muscle strength exercises in the range of 60°to 90° until the muscle strength of both legs is equal.</p> <p>(3) 0°to 60° squat training, gradually increasing the resistance strength (for patients with meniscal repair, squat to the target angle on the healthy leg before shifting the weight to the middle of the two legs).</p> <p>(4) Stand with both legs on a balance board for balance training in multiple directions.</p> <p>(5) Single-leg standing balance training on the affected leg (with eyes closed and open and on a support surface with different degrees of softness).</p> <p>(6) Straight leg raise training in the standing position can increase resistance appropriately.</p> | <p>Exercise with a rope tied around the waist or on a treadmill for forward and backward gait training.</p>                                                                                                    | <p>(1) Manipulation to push the patella treatment.</p> <p>(2) Manipulation of the surgical scar.</p> <p>(3) Manipulative passive knee flexion or extension angle exercises.</p> | <p>The knee joint moves to an active full angle, aligning with the healthy side leg.</p> <p>(1) Normal gait can be achieved without any walking aid.</p> <p>(2) Self-care of daily life (may have difficulty walking up and down steps).</p> | <p>Fully weight bearing; normal gait can be achieved without a brace or walker at 3 weeks postoperatively.</p>                                                                                                                                                                                                                                                                              |

202

203

**Table2: Phases 4-5 of the post-ACLR rehabilitation program**

| Phase | Movement Exercises | Gait Exercises | Manipulative Massage | Rehabilitation Goals | Precautions |
|-------|--------------------|----------------|----------------------|----------------------|-------------|
|-------|--------------------|----------------|----------------------|----------------------|-------------|

|                             |                                                                                                                                                                                                                                                                                                                                                                                                                                                                                                                                                                                                                                                                                                                                                                                                                                                                                                                                                                                                                                                                                                                                                                                                                                                |                                                                     |                                         |                                                                                                                                                                                                                                                                                                                                                                                                                           |                                                                                                                                                                                                                                               |
|-----------------------------|------------------------------------------------------------------------------------------------------------------------------------------------------------------------------------------------------------------------------------------------------------------------------------------------------------------------------------------------------------------------------------------------------------------------------------------------------------------------------------------------------------------------------------------------------------------------------------------------------------------------------------------------------------------------------------------------------------------------------------------------------------------------------------------------------------------------------------------------------------------------------------------------------------------------------------------------------------------------------------------------------------------------------------------------------------------------------------------------------------------------------------------------------------------------------------------------------------------------------------------------|---------------------------------------------------------------------|-----------------------------------------|---------------------------------------------------------------------------------------------------------------------------------------------------------------------------------------------------------------------------------------------------------------------------------------------------------------------------------------------------------------------------------------------------------------------------|-----------------------------------------------------------------------------------------------------------------------------------------------------------------------------------------------------------------------------------------------|
| <b>Phase 4 (4-8 weeks)</b>  | <p>(1) Fixed cycling training: gradually increasing the resistance.</p> <p>(2) Squat training: Double leg transition to a single leg (0° to 60°), gradually increasing resistance.</p> <p>(3) Lunge training (0° to 60°).</p> <p>(4) Step training: centripetal and centrifugal contraction of the anterior thigh muscles (knee does not exceed 60°).</p> <p>(5) Tiptoe training: Double leg transition to a single leg.</p> <p>(6) Swing exercise: The affected leg stands on one leg, and the healthy leg is strapped with an elastic band and swings, transitioning from front-to-back swing to lateral swing and then to rotation or random direction movement.</p> <p>(7) Rotational stability training: static lunge stance, lateral pull pulley exercise.</p> <p>(8) Exercise with a rope tied around the waist to provide resistance; walking exercises in the forward and backward, left and right directions.</p> <p>(9) Walking exercises on the treadmill in 4 directions.</p> <p>(10) Balance board training: various of support surfaces, double-legged standing.</p> <p>(11) Single-leg stand for ball tossing exercises.</p> <p>(12) Core training: supine or prone position for bridge exercise, standing to pull pulley.</p> | Go around obstacles at normal walking speeds on different surfaces. | Manual method to loosen surgical scars. | <p>(1) Center of gravity in the middle, squatting bilaterally to 60° (no more than 60°).</p> <p>(2) Knee in good condition (slight pain and effusion, no instability).</p> <p>(3) The circumference at the upper edge of the patella is 10 cm, within a 1 to 2 cm difference between the legs.</p> <p>(4) The affected limb can maintain balance for &gt; 30 seconds while standing on one leg with little body sway.</p> | <p>(1) Do not participate in sports with a high impact on the joints, such as running or jumping.</p> <p>(2) Do not participate in sports with high lateral stress on the joints.</p> <p>(3) Avoid squatting deeply (limit to 0° to 60°).</p> |
| <b>Phase 5 (8-12 weeks)</b> | <p>(1) Squat training: transition from double to single leg (0° to 60°), gradually increasing resistance.</p> <p>(2) Lunge training (0° to 60°).</p> <p>(3) Tiptoe training: double-leg transition to single-leg.</p> <p>(4) Increasing the strength of the posterior lateral muscle group with plyometric training.</p> <p>Core muscle strength training.</p> <p>① Combined strength training with balance training (throwing and catching balls on the balance board, small squats on the balance board, etc.)</p> <p>② Advanced balance function training (affected leg standing on one leg, hand or opposite foot to touch objects on the ground or lateral pulling elastic band)</p> <p>③ Swimming training, in addition to breaststroke. Additionally, care should be taken not to stir the leg at a deep squatting angle or to use a splint when swimming.</p> <p>④ Cycling training every other day.</p>                                                                                                                                                                                                                                                                                                                               | —                                                                   | —                                       | <p>(1) The thigh circumference of both legs is close to the same (within 1 cm of each other).</p> <p>(2) The affected limb squats to 60° on one leg.</p> <p>(3) The affected limb can stand on one leg to maintain balance for 60 seconds.</p> <p>(4) Little, if any, oedema with activity.</p>                                                                                                                           | Patellar tendonitis may occur.                                                                                                                                                                                                                |

204

205

206

**Table 3: Phases 6-7 of the post-ACLR rehabilitation program**

| Phase                        | Movement Exercises                                                                                                                                                                                                    | Gait Exercises | Manipulative Massage | Rehabilitation Goals                                                                                                                                                                                                                                                                                                                                 | Precautions                                                                                                                                                                                                                                                                  |
|------------------------------|-----------------------------------------------------------------------------------------------------------------------------------------------------------------------------------------------------------------------|----------------|----------------------|------------------------------------------------------------------------------------------------------------------------------------------------------------------------------------------------------------------------------------------------------------------------------------------------------------------------------------------------------|------------------------------------------------------------------------------------------------------------------------------------------------------------------------------------------------------------------------------------------------------------------------------|
| <b>Phase 6 (12-16 weeks)</b> | <p>(1) Jogging movement: multiple directions for running</p> <p>(2) Increasing the speed of all sports.</p> <p>(3) Skateboard training, slow walking in the water and other forms of exercise can be carried out.</p> | —              | —                    | <p>(1) Squat down to 60° on one leg with the affected limb and repeat 20 times.</p> <p>(2) The affected leg can stand on one leg to maintain balance for at least 60 seconds.</p> <p>(3) Vertical or horizontal jump with both legs with a good landing position.</p> <p>(4) Single-leg jump: 80% of the ability of the healthy leg is achieved.</p> | <p>Avoid wrong movements or posture.</p> <p>(1) Landing with the knee joint too straight.</p> <p>(2) The knee joint is turned outward or inward when landing.</p> <p>(3) When landing or bouncing, the healthy leg always takes the lead, and the affected leg does not.</p> |



---

Phase 6 (12-16 weeks)

(1) Jogging movement: multiple directions for running.  
 (2) Increasing the speed of all sports.  
 (3) Skateboard training, slow walking in the water and other forms of exercise can be carried out.

(1) Squat down to 60° on one leg with the affected limb and repeat 20 times.  
 (2) The affected leg can stand on one leg to maintain balance for at least 60 seconds.  
 (3) Vertical or horizontal jump with both legs with a good landing position.  
 (4) Single-leg jump: 80% of the ability of the healthy leg is achieved.

Avoid wrong movements or posture.  
 (1) Landing with the knee joint too straight.  
 (2) The knee joint is turned outward or inward when landing.  
 (3) When landing or bouncing, the healthy leg always takes the lead, and the affected leg does not.

---

207

208

209 **Baseline indicators and observations**

210 Baseline and preoperative patient characteristics included the subject's sex, age,  
 211 affected limb (left or right), cause of injury (playing basketball, other sports such as  
 212 soccer), smoking status (yes or no), time from injury to surgery (fresh injury or old  
 213 rupture), whether the injury was accompanied by cartilage and meniscal damage, time  
 214 of surgery, and degree of ACL fracture (partial or total).

215 **Study endpoints**

216 **Primary outcome/endpoint:** The IKDC scores changes in knee function from  
 217 preoperative to 6 months postoperative. The IKDC is a commonly used tool to evaluate  
 218 outcomes after knee surgeries, including ACLR<sup>27</sup>. The IKDC knee score consists of a  
 219 knee assessment (10 entries) and a knee ligament checklist (8 entries), covering joint  
 220 pain, motor level and daily activity ability, with a total score of 0 to 100. The IKDC can  
 221 address knee symptoms, function and physical activity. The IKDC assesses symptoms,  
 222 function and physical activity of the knee. Patients were evaluated with the  
 223 questionnaire preoperatively and at follow-up visits at 1, 3, 6, 12, and 24 months  
 224 postoperatively.

225 **Secondary outcomes/endpoints:** LKS, KOOS (including knee symptoms, pain,  
 226 activities of daily living, sports and recreational activities, and quality of life), VAS  
 227 (For pain assessment), Lachman test, MRI imaging data, and assessment of knee  
 228 stability using the Kneelax3 knee stability meter.

229 (1) Kneelax3 (MONITORED REHAB SYSTEMS B.V. Model: KNEELAX3, The  
 230 Netherlands): preoperatively and 1, 3, 6, 12 and 24 months postoperatively; the  
 231 Kneelax3 arthrometer was used for the assessment of knee stability.

232 (2) LKS: This scoring system consists of 8 questions on a scale of 0-100, with higher  
 233 scores representing a better patient's functional status. The main tendency is toward  
 234 activities of daily living, and patients were assessed by questionnaires before surgery  
 235 and at 1, 3, 6, 12, and 24 months of postoperative follow-up visits<sup>28</sup>.

236 (3) KOOS score: The KOOS consists of 5 subscales: pain, other knee symptoms,  
 237 activities of daily living (ADL), function in sport and recreation (Sport/Rec), and knee-  
 238 related quality of life (QOL)<sup>29</sup>. Patients were given one week to consider before  
 239 answering the questions, and each question had five alternative boxes with scores  
 240 ranging from 0 to 4. Standard scores were calculated for each subscale (100 for no

241 symptoms and 0 for extreme symptoms), and patients were assessed with  
242 questionnaires before surgery and at follow-up visits at 1, 3, 6, 12, and 24 months after  
243 surgery.

244 (4) VAS score: The visual analogue pain scoring method is more sensitive and  
245 comparable. In this trial, a 100-mm VAS pain score (including resting state score, 30-  
246 min post-walk score and overall pain level in the past month) was used<sup>30</sup>. This protocol  
247 only assesses pain at rest, with 0 representing no pain and 100 representing the most  
248 severe pain. Patients were evaluated with questionnaires at preoperative and  
249 postoperative follow-up visits at 1, 3, 6, 12, and 24 months.

250 (5) Lachman test: This assesses ACL function with the patient in the supine or prone  
251 position with the knee flexed at approximately a 30° angle<sup>31</sup>. The examiner uses one  
252 hand to immobilize the thigh while the other attempts to move the tibia forward.  
253 Positive results suggest that patients with ACL injuries be tested preoperatively and at  
254 follow-up visits at 1, 3, 6, 12, and 24 months postoperatively.

255 (6) MRI assessment: MRI was performed at 12 and 24 months postoperatively to assess  
256 the patient's reconstructed ACL.

### 257 **Patient termination and withdrawal criteria**

258 Patients may withdraw from this trial at any time. Patients may withdraw from the study  
259 for the following reasons.

260 **(1) Surgical failure:** 1) occurrence of infection, 2) no secondary rupture of the  
261 reconstructed ligament (rupture of the ligament, rupture of the internal brace  
262 augmentation line and both in the trial group, rupture of the reconstructed ligament in  
263 the control group), 3) knee instability: patient self-reported knee instability, or Lachman  
264 test (+) or Kneelax3 knee arthrometer test revealed a 3-mm difference in comparison  
265 with the healthy side.

266 **(2) Patient withdrawal from the trial:** All subjects had the right to withdraw at any  
267 time during the study. A subject was withdrawn from the trial if any of the following  
268 occurred during the trial: 1) withdrawal of informed consent by the subject; 2) a person  
269 who, in the opinion of the investigator, is no longer suitable for continuation of the  
270 clinical trial; 3) a woman who becomes pregnant during the clinical trial; 4) death of  
271 the subject; or 5) the subject is lost to follow-up.

### 272 **(3) Trial termination:**

273 1) The clinical trial institution and the investigator found that the risks to patients of  
274 continuing the clinical trial exceed the possible benefits; 2) the ethics committee finds  
275 that the rights of the subjects cannot be protected; 3) the sponsor requests termination  
276 of the trial for various reasons; and 4) the national administrative authority requests  
277 termination.

278 The timing and reasons for withdrawal from the trial were recorded in detail on the case  
279 report form; follow-up care is no longer provided for subjects who voluntarily withdraw  
280 from the treatment as well as for those for whom follow-up data are not being collected,  
281 but subjects who withdrew from the trial due to adverse events or because of surgical  
282 failure must be followed up until the adverse events stabilized or resolved or until the  
283 investigator deemed that further follow-up was no longer necessary.

## 284 **Data management**

285 The trial used an electronic data collection (EDC) system for data management. The  
286 investigator or investigator-authorized research staff completed the electronic Case  
287 Report Form (eCRF) through the EDC system in an accurate, timely, complete and  
288 standardized manner based on the original information from the subjects. Questionnaire  
289 checking, data cleaning and summarization were performed in a promptly after each  
290 follow-up visit. The follow-up survey is proposed to adopt the electronic questionnaire  
291 system and on-site questionnaire survey, and the on-site survey results will be saved in  
292 time and organized in the database later. The investigator or the investigator's  
293 authorized researcher enters the data into the EDC according to their respective  
294 accounts. The data administrator verifies the data's reliability, completeness, and  
295 accuracy in the EDC. If any questionable data are found, a challenge can be issued in  
296 the system, and the investigator or the investigator's delegated researcher verifies,  
297 corrects, or answers the query. When all data have been entered into the database, and  
298 all queries have been resolved, the database will be locked by the data administrator. If  
299 a problem is found after the database is locked and there is a need to correct it, the  
300 process of unlocking and relocking the data should be followed. After the database is  
301 locked, the data manager submits the data to the statistical analyst for statistical analysis  
302 as scheduled.

## 303 **Statistical analysis**

304 **(1) Statistical design:** This trial was a randomized controlled clinical trial.

305 **(2) Principles of Statistical Analysis:** All statistical analyses were performed in SAS  
306 version 9.4 or later, R version 3.3.2 or later, or SPSS24. All statistical tests were  
307 performed using two-sided tests, and P values less than or equal to 0.05 were considered  
308 statistically significant for the differences tested (unless otherwise specified).

309 1) Summary statistics for continuous variables: including the mean, standard deviation,  
310 median, minimum, maximum, lower quartile (Q1), and upper quartile (Q3); summary  
311 statistics for categorical variables, including the number of cases and percentage of each  
312 category.

313 2) Between-group comparisons of demographic baseline characteristics: Group  
314 comparisons for continuous variables will be made using independent samples t-test  
315 (chi-square, normal distribution) or Wilcoxon rank sum test depending on data  
316 distribution, and the chi-square test or the exact probability method for categorical  
317 variables (if chi-square test is not applicable).

## 318 **(3) Completion and demographic analyses**

319 Baseline analyses were based on the full analysis set (FAS). The enrollment and  
320 completion status of the trials were summarized, and the reasons for noncompletion are  
321 described in a detailed table. Subjects' demographic characteristics were described and  
322 compared to measure the comparability of the two groups. Validity reporting data were  
323 accepted only if the baseline was balanced between groups; otherwise, validity data  
324 were subject to correction before reporting.

## 325 **(4) Patient-reported outcome validity evaluation indices**

326 The outcome validity evaluation will be based on the FAS and the per-protocol set  
327 (PPS). The statistical description and inference of the data will be based on the

328 characteristics of the data and the selection of applicable descriptive indicators and  
329 hypothesis testing methods.

330 **Primary patient-reported outcome:** comparison of IKDC knee scores at 6 months  
331 ( $\pm 2$  weeks) postoperatively in the trial and control groups. We will use a linear  
332 regression model for analysis to correct for possible confounding factors, such as age,  
333 sex, and cause of injury. Preoperative baseline IKDC scores were used as predictors  
334 when conducting the analysis, and IKDC at 6 months ( $\pm 2$  weeks) was used as an  
335 indicator of posttreatment outcomes.

### 336 **Secondary patient-reported outcomes**

337 1) Because IKDC scores were measured multiple times during patient follow-up, we  
338 used a linear mixed model to compare changes over time between the trial and control  
339 groups.

340 2) Anterior tibial translation distance is measured by the Kneelax3 knee stability meter,  
341 and comparisons of anterior tibial translation distance between the test and control  
342 groups at the same postoperative time points with the same force will be performed  
343 using either an independent samples t-test (chi-square, normally distributed) or a  
344 Wilcoxon rank sum test. A linear mixed model will also be used to compare and analyze  
345 the evolution of these consecutive results over time in both groups.

346 3) Here, the comparative analysis of failure rate and infection rate in the control group  
347 versus the test group during the main 6 months will be performed using the chi-square  
348 test or the t-test.

349 4) Linear regression of continuous outcomes from baseline to 24 months, such as the  
350 LKS, KOOS score (including knee symptoms, pain, activities of daily living, sports and  
351 recreational activities, quality of life), Lachman test, and pain visual analogue score  
352 (VAS) protocols, will be used to compare and analyze the evolution of these continuous  
353 outcomes over time in the two groups using linear mixed models.

354 5) The morphology and signal intensity of the postoperative ACL will be assessed using  
355 MRI methods, and the different treatments will be compared at different time points  
356 using chi-square tests.

### 357 **Analysis of safety indicators**

358 The safety evaluation was based on the safety set (SS) analysis dataset. The  
359 internationally accepted MedDRA term set classification was used for adverse event  
360 coding, and the types of adverse events, frequency, severity, and relationship to internal  
361 brace enhancement line generation and surgery were summarized by a group. A detailed  
362 list of the various adverse events is provided, with special notation for subjects who  
363 discontinued the trial because of adverse events and for those who experienced serious  
364 adverse events. The proportion of patients who developed complications between  
365 treatments was compared using a chi-square test.

### 366 **Patient and public involvement**

367 Patients and/or the public were not involved in this research's design, conduct, reporting,  
368 or dissemination plans.

### 369 **Discussion**

1  
2  
3 370 This trial was conducted as a prospective randomised controlled trial to investigate the  
4 371 clinical efficacy of ACLR with or without the internal brace technique. In this 2-year  
5 372 follow-up study, the subjective, objective, and functional outcomes of patients who  
6 373 underwent ACLR with the application of the internal brace technique or ACLR alone  
7 374 were compared. This study hypothesises that ACLR with the internal brace technique  
8 375 will be more stable than ACLR alone in the early postoperative period, with a lower  
9 376 incidence of secondary injury, reduced duration and extent of pain, and an earlier return  
10 377 to preinjury activity levels. However, there may be no significant difference between  
11 378 the two groups regarding patient-reported outcome indicators as recovery time  
12 379 increases.

13  
14  
15 380 ACL rupture is a common knee injury in the athletic population and has been  
16 381 extensively studied. Studies as early as the late 20th century have shown that ACLR is  
17 382 superior to ACL repair<sup>32 33</sup>. The ACL is an important structure for maintaining knee  
18 383 stability, preventing anterior tibial displacement and limiting intratibial rotation<sup>34</sup>,  
19 384 making ACLR surgery the gold standard of treatment for patients recovering motion or  
20 385 performing rotational activities after an ACL rupture in the knee<sup>35</sup>. The recovery of  
21 386 knee function after surgery depends on the ability of the ACL graft to withstand  
22 387 appropriate loads during rehabilitation and after return to sports. The tendon graft  
23 388 implanted in the human knee joint survives in the intra-articular environment and  
24 389 gradually in the ligaments. The graft is fragile and vulnerable to reinjury during the pre-  
25 390 remodelling phase prior to ligamentization<sup>36</sup>, so a careful rehabilitation program should  
26 391 be developed to prevent reinjury during the rehabilitation period. Several studies have  
27 392 found a higher probability of re-rupture or secondary revision for athletes and  
28 393 adolescents or for ACLR using either autologous tendons or allogeneic tendons<sup>10 37</sup>.  
29 394 Therefore, a surgical approach that increases the structural strength of the graft and  
30 395 protects it during the early stages of graft ligamentization is of great importance.

31  
32  
33  
34 396 The biomechanical properties of the intra-articular reconstructed ligaments improved  
35 397 at 8 weeks postoperatively for the FiberTape suture applied in a rabbit model.  
36 398 Additionally, during this period, FiberTape did not adversely affect bone tunnel healing  
37 399 or cause a long-term increase in indicators of inflammation<sup>12</sup>. In a dog model, no severe  
38 400 inflammation or immune response, bone erosion, or premature OA development was  
39 401 observed 6 months postoperatively<sup>38</sup>. The results of these studies will support the  
40 402 biocompatibility and safety of intra-articular suture tape for ACLR enhancement.

41  
42  
43 403 A study of load sharing after ACL graft enhancement by suture tape reported that load  
44 404 sharing began at 200 N and 300 N for 7-mm and 9-mm grafts, respectively. The final  
45 405 peak load (400 N) would be shared by 31% (7-mm graft) and 20% (9-mm graft) by the  
46 406 suture tape<sup>39</sup>. Suture tape ligament augmentation may protect biological grafts from  
47 407 excessive peak loading and elongation. After ACLR in the early recovery phase, suture  
48 408 band augmentation increases ACL graft stiffness by 104% and the ultimate breaking  
49 409 load by 57%, reducing the graft failure rate in clinical situations.

50  
51  
52 410 A recent systematic review paper by Christopher et al. concluded from biomechanical,  
53 411 animal and clinical studies that applying suture tape augmentation in ACLR increases  
54 412 biomechanical stability<sup>40</sup>. Therefore, in this randomized controlled trial, we will  
55 413 conduct a prospective observational comparison and a long-term follow-up to elucidate  
56 414 the clinical efficacy of internal bracing in ACLR.

## 57 58 415 **Abbreviations**



- 1  
2  
3 416 Anterior cruciate ligament (ACL)  
4  
5 417 Anterior cruciate ligament reconstruction (ACLR)  
6  
7 418 International Knee Documentation Committee (IKDC)  
8  
9 419 the Knee Injury and Osteoarthritis Outcome Score (KOOS)  
10  
11 420 Lysholm knee score (LKS)  
12  
13 421 Visual Analog Scale (VAS)  
14  
15 422 ultrahigh molecular weight polyethylene (UHMWPE)  
16  
17 423 Standard Protocol Items: Recommendations for Interventional Trials (SPIRIT)  
18  
19 424 activities of daily living (ADL)  
20  
21 425 sport and recreation (Sport/Rec)  
22  
23 426 quality of life (QOL)  
24  
25 427 medial collateral ligament (MCL)  
26  
27 428 minimum clinically important difference (MCID)  
28  
29 429 electronic Case Report Form (eCRF)  
30  
31 430 safety set (SS)

### 431 **Ethics and dissemination**

432 The trial was approved by the Medical Ethics Committee of Xiangya Hospital of  
433 Central South University on October 26, 2021, with the ethics number "202110478"  
434 and prospectively registered in the China Clinical Trials Registry on March 14, 2022,  
435 with the registration number: ChiCTR2200057526. All subjects signed an informed  
436 consent form before participating in this trial, and we will protect the patients from any  
437 invasion of their private privacy. All investigators will keep the study results  
438 confidential until after the data are made public, and the investigators will release no  
439 data related to the database without the approval of the principal investigator. We will  
440 publish the findings and data in peer-reviewed journals and present them at national  
441 and international conferences.

### 442 **Acknowledgements**

443 We want to thank all the medical and nursing staff of the Department of Bone and Joint  
444 Surgery of Xiangya Hospital of Central South University for their unfailing care and  
445 great help to our patients. We also thank the patients for their support and trust in us.  
446 Not only that, but thanks are due to Jandan Tadum Arthur Vetran, who contributed  
447 greatly to revising the manuscript and embellishing the language.

### 448 **Author contributions**

449 WF-X and YS-L established the study design; WH-L conceived the design and wrote  
450 the draft manuscript; D-L, ZJ-C, and LY-P were involved in data acquisition, analysis,  
451 and interpretation; and WQ-X, HF-J, and X-L designed the rehabilitation protocol. All  
452 authors read and approved the final manuscript.

## 453 **Funding**

454 This work was supported by National Clinical Research Center for Geriatric  
455 Disorders (Xiangya Hospital, Grant No.2021KFJJ02), National Clinical Research  
456 Center for Orthopedics, Sports Medicine and Rehabilitation (2021-NCRC-CXJJ-PY-  
457 40), and the Independent Exploration and Innovation Project for Postgraduate  
458 Students of Central South University (No. 2022ZZTS0906).

## 459 **Competing interests**

460 The authors declare that they have no competing interests regarding the present study.

## 461 **Author information**

462 Wen-hao Lu, Email: [lwhao0717@csu.edu.cn](mailto:lwhao0717@csu.edu.cn)

463 Di Liu, Email: [liudi9704@csu.edu.cn](mailto:liudi9704@csu.edu.cn)

464 Zi-jun Cai, Email: [caizijun@csu.edu.cn](mailto:caizijun@csu.edu.cn)

465 Lin-yuan Pan, Email: [Panlinyuan@csu.edu.cn](mailto:Panlinyuan@csu.edu.cn)

466 Wen-qing Xie, Email: [xiewenqing@csu.edu.cn](mailto:xiewenqing@csu.edu.cn)

467 Hong-Fu Jin, Email: [218112327@csu.edu.cn](mailto:218112327@csu.edu.cn).

468 Xu Liu, Email: [liuxu990702@163.com](mailto:liuxu990702@163.com)

469 Yu-sheng Li, Email: [liyusheng@csu.edu.cn](mailto:liyusheng@csu.edu.cn).

470 Wen-feng Xiao, Email: [xiaowenfneng@csu.edu.cn](mailto:xiaowenfneng@csu.edu.cn).

## 471 **Author Affiliations**

472 <sup>1</sup> Department of Orthopaedics, Xiangya Hospital, Central South University, Changsha  
473 410008, Hunan, China.

474 <sup>2</sup> National Clinical Research Center for Geriatric Disorders, Xiangya Hospital, Central  
475 South University, Changsha 410008, Hunan, China.

## 476 **References**

- 477 1. Robson AW. VI. Ruptured Crucial Ligaments and their Repair by Operation  
478 *Ann Surg* 1903;37(5):716-8. [published Online First: 1903/05/01]
- 479 2. Patterson BE, Culvenor AG, Barton CJ, et al. Worsening Knee Osteoarthritis  
480 Features on Magnetic Resonance Imaging 1 to 5 Years After Anterior Cruciate  
481 Ligament Reconstruction. *Am J Sports Med* 2018;46(12):2873-83. doi:  
482 10.1177/0363546518789685 [published Online First: 2018/09/05]
- 483 3. Suter LG, Smith SR, Katz JN, et al. Projecting Lifetime Risk of Symptomatic Knee  
484 Osteoarthritis and Total Knee Replacement in Individuals Sustaining a  
485 Complete Anterior Cruciate Ligament Tear in Early Adulthood. *Arthritis Care  
486 Res (Hoboken)* 2017;69(2):201-08. doi: 10.1002/acr.22940 [published Online  
487 First: 2016/05/24]

- 1  
2  
3 488 4. Filbay SR, Culvenor AG, Ackerman IN, et al. Quality of life in anterior cruciate  
4 489 ligament-deficient individuals: a systematic review and meta-analysis. *Br J*  
5 490 *Sports Med* 2015;49(16):1033-41. doi: 10.1136/bjsports-2015-094864  
6 491 [published Online First: 2015/08/01]
- 7  
8 492 5. Moses B, Orchard J, Orchard J. Systematic review: Annual incidence of ACL injury  
9 493 and surgery in various populations. *Res Sports Med* 2012;20(3-4):157-79. doi:  
10 494 10.1080/15438627.2012.680633 [published Online First: 2012/06/30]
- 11  
12 495 6. Griffin LY, Albohm MJ, Arendt EA, et al. Understanding and preventing noncontact  
13 496 anterior cruciate ligament injuries: a review of the Hunt Valley II meeting,  
14 497 January 2005. *Am J Sports Med* 2006;34(9):1512-32. doi:  
15 498 10.1177/0363546506286866 [published Online First: 2006/08/15]
- 16  
17 499 7. de Sa D, Shanmugaraj A, Weidman M, et al. All-Inside Anterior Cruciate Ligament  
18 500 Reconstruction-A Systematic Review of Techniques, Outcomes, and  
19 501 Complications. *J Knee Surg* 2018;31(9):895-904. doi: 10.1055/s-0038-1627446  
20 502 [published Online First: 2018/03/13]
- 21  
22 503 8. Di Benedetto P, Di Benedetto E, Fiocchi A, et al. Causes of Failure of Anterior  
23 504 Cruciate Ligament Reconstruction and Revision Surgical Strategies. *Knee Surg*  
24 505 *Relat Res* 2016;28(4):319-24. doi: 10.5792/ksrr.16.007 [published Online First:  
25 506 2016/11/29]
- 26  
27 507 9. Vaishya R, Agarwal AK, Ingole S, et al. Current Trends in Anterior Cruciate  
28 508 Ligament Reconstruction: A Review. *Cureus* 2015;7(11):e378. doi:  
29 509 10.7759/cureus.378 [published Online First: 2015/12/24]
- 30  
31 510 10. Takazawa Y, Ikeda H, Saita Y, et al. Return to Play of Rugby Players After Anterior  
32 511 Cruciate Ligament Reconstruction Using Hamstring Autograft: Return to Sports  
33 512 and Graft Failure According to Age. *Arthroscopy* 2017;33(1):181-89. doi:  
34 513 10.1016/j.arthro.2016.06.009 [published Online First: 2016/08/16]
- 35  
36 514 11. Ellis HB, Matheny LM, Briggs KK, et al. Outcomes and revision rate after bone-  
37 515 patellar tendon-bone allograft versus autograft anterior cruciate ligament  
38 516 reconstruction in patients aged 18 years or younger with closed physes.  
39 517 *Arthroscopy* 2012;28(12):1819-25. doi: 10.1016/j.arthro.2012.06.016  
40 518 [published Online First: 2012/10/30]
- 41  
42 519 12. Soreide E, Denbeigh JM, Lewallen EA, et al. In vivo assessment of high-molecular-  
43 520 weight polyethylene core suture tape for intra-articular ligament reconstruction:  
44 521 an animal study. *Bone Joint J* 2019;101-b(10):1238-47. doi: 10.1302/0301-  
45 522 620x.101b10.Bjj-2018-1282.R2 [published Online First: 2019/10/01]
- 46  
47 523 13. Lubowitz JH, MacKay G, Gilmer B. Knee medial collateral ligament and  
48 524 posteromedial corner anatomic repair with internal bracing. *Arthrosc Tech*  
49 525 2014;3(4):e505-8. doi: 10.1016/j.eats.2014.05.008 [published Online First:  
50 526 2014/10/03]
- 51  
52 527 14. Gilmer BB, Crall T, DeLong J, et al. Biomechanical Analysis of Internal Bracing  
53 528 for Treatment of Medial Knee Injuries. *Orthopedics* 2016;39(3):e532-7. doi:  
54 529 10.3928/01477447-20160427-13 [published Online First: 2016/05/03]
- 55  
56 530 15. Heusdens CHW, Hopper GP, Dossche L, et al. Anterior cruciate ligament repair



- 1  
2  
3 531 with Independent Suture Tape Reinforcement: a case series with 2-year follow-  
4 532 up. *Knee Surg Sports Traumatol Arthrosc* 2019;27(1):60-67. doi:  
5 533 10.1007/s00167-018-5239-1 [published Online First: 2018/11/02]
- 7 534 16. Nishimura A, Nakazora S, Senga Y, et al. Arthroscopic Internal Brace  
8 535 Augmentation With Arthroscopic Modified Broström Operation for Chronic  
9 536 Ankle Instability. *Arthrosc Tech* 2021;10(4):e995-e1000. doi:  
10 537 10.1016/j.eats.2020.11.021 [published Online First: 2021/05/14]
- 12 538 17. Wilk KE, Arrigo CA, Bagwell MS, et al. Repair of the Ulnar Collateral Ligament  
13 539 of the Elbow: Rehabilitation Following Internal Brace Surgery. *J Orthop Sports*  
14 540 *Phys Ther* 2019;49(4):253-61. doi: 10.2519/jospt.2019.8215 [published Online  
15 541 First: 2019/03/14]
- 17 542 18. van Eck CF, Limpisvasti O, ElAttrache NS. Is There a Role for Internal Bracing  
18 543 and Repair of the Anterior Cruciate Ligament? A Systematic Literature Review.  
19 544 *Am J Sports Med* 2018;46(9):2291-98. doi: 10.1177/0363546517717956  
20 545 [published Online First: 2017/08/08]
- 22 546 19. Cook JL, Smith P, Stannard JP, et al. A Canine Arthroscopic Anterior Cruciate  
23 547 Ligament Reconstruction Model for Study of Synthetic Augmentation of  
24 548 Tendon Allografts. *J Knee Surg* 2017;30(7):704-11. doi: 10.1055/s-0036-  
25 549 1597618 [published Online First: 2016/12/27]
- 27 550 20. Bachmaier S, Smith PA, Bley J, et al. Independent Suture Tape Reinforcement of  
28 551 Small and Standard Diameter Grafts for Anterior Cruciate Ligament  
29 552 Reconstruction: A Biomechanical Full Construct Model. *Arthroscopy*  
30 553 2018;34(2):490-99. doi: 10.1016/j.arthro.2017.10.037 [published Online First:  
31 554 2017/12/26]
- 33 555 21. Bedi A. Editorial Commentary: Buckle Up Surgeons: "Safety Belt" Reinforcement  
34 556 of Knee Anterior Cruciate Ligament Reconstruction Grafts. *Arthroscopy*  
35 557 2018;34(2):500-01. doi: 10.1016/j.arthro.2017.12.009 [published Online First:  
36 558 2018/02/08]
- 38 559 22. Moher D, Hopewell S, Schulz KF, et al. CONSORT 2010 explanation and  
39 560 elaboration: updated guidelines for reporting parallel group randomised trials.  
40 561 *International journal of surgery (London, England)* 2012;10(1):28-55. doi:  
41 562 10.1016/j.ijsu.2011.10.001 [published Online First: 2011/11/01]
- 43 563 23. Collins NJ, Misra D, Felson DT, et al. Measures of knee function: International  
44 564 Knee Documentation Committee (IKDC) Subjective Knee Evaluation Form,  
45 565 Knee Injury and Osteoarthritis Outcome Score (KOOS), Knee Injury and  
46 566 Osteoarthritis Outcome Score Physical Function Short Form (KOOS-PS), Knee  
47 567 Outcome Survey Activities of Daily Living Scale (KOS-ADL), Lysholm Knee  
48 568 Scoring Scale, Oxford Knee Score (OKS), Western Ontario and McMaster  
49 569 Universities Osteoarthritis Index (WOMAC), Activity Rating Scale (ARS), and  
50 570 Tegner Activity Score (TAS). *Arthritis Care Res (Hoboken)* 2011;63 Suppl  
51 571 11(0 11):S208-28. doi: 10.1002/acr.20632 [published Online First: 2012/05/25]
- 53 572 24. Irrgang JJ, Anderson AF, Boland AL, et al. Responsiveness of the International  
54 573 Knee Documentation Committee Subjective Knee Form. *Am J Sports Med*  
55 574 2006;34(10):1567-73. doi: 10.1177/0363546506288855 [published Online First:

- 1  
2  
3 575 2006/07/28]  
4  
5 576 25. Li YL, Ning GZ, Wu Q, et al. Single-bundle or double-bundle for anterior cruciate  
6 577 ligament reconstruction: a meta-analysis. *Knee* 2014;21(1):28-37. doi:  
7 578 10.1016/j.knee.2012.12.004 [published Online First: 2013/01/12]  
8  
9 579 26. Lubowitz JH. All-inside anterior cruciate ligament graft link: graft preparation  
10 580 technique. *Arthrosc Tech* 2012;1(2):e165-8. doi: 10.1016/j.eats.2012.06.002  
11 581 [published Online First: 2013/06/15]  
12  
13 582 27. Greco NJ, Anderson AF, Mann BJ, et al. Responsiveness of the International Knee  
14 583 Documentation Committee Subjective Knee Form in comparison to the Western  
15 584 Ontario and McMaster Universities Osteoarthritis Index, modified Cincinnati  
16 585 Knee Rating System, and Short Form 36 in patients with focal articular cartilage  
17 586 defects. *Am J Sports Med* 2010;38(5):891-902. doi:  
18 587 10.1177/0363546509354163 [published Online First: 2010/01/02]  
19  
20  
21 588 28. Briggs KK, Lysholm J, Tegner Y, et al. The reliability, validity, and responsiveness  
22 589 of the Lysholm score and Tegner activity scale for anterior cruciate ligament  
23 590 injuries of the knee: 25 years later. *Am J Sports Med* 2009;37(5):890-7. doi:  
24 591 10.1177/0363546508330143 [published Online First: 2009/03/06]  
25  
26 592 29. Collins NJ, Prinsen CA, Christensen R, et al. Knee Injury and Osteoarthritis  
27 593 Outcome Score (KOOS): systematic review and meta-analysis of measurement  
28 594 properties. *Osteoarthritis Cartilage* 2016;24(8):1317-29. doi:  
29 595 10.1016/j.joca.2016.03.010 [published Online First: 2016/03/26]  
30  
31 596 30. Wewers ME, Lowe NK. A critical review of visual analogue scales in the  
32 597 measurement of clinical phenomena. *Res Nurs Health* 1990;13(4):227-36. doi:  
33 598 10.1002/nur.4770130405 [published Online First: 1990/08/01]  
34  
35 599 31. Coffey R, Bordoni B. Lachman Test. StatPearls. Treasure Island (FL): StatPearls  
36 600 Publishing  
37  
38 601 Copyright © 2022, StatPearls Publishing LLC. 2022.  
39  
40 602 32. Engebretsen L, Benum P, Fasting O, et al. A prospective, randomized study of three  
41 603 surgical techniques for treatment of acute ruptures of the anterior cruciate  
42 604 ligament. *Am J Sports Med* 1990;18(6):585-90. doi:  
43 605 10.1177/036354659001800605 [published Online First: 1990/11/01]  
44  
45 606 33. Grøntvedt T, Engebretsen L, Benum P, et al. A prospective, randomized study of  
46 607 three operations for acute rupture of the anterior cruciate ligament. Five-year  
47 608 follow-up of one hundred and thirty-one patients. *J Bone Joint Surg Am*  
48 609 1996;78(2):159-68. doi: 10.2106/00004623-199602000-00001 [published  
49 610 Online First: 1996/02/01]  
50  
51 611 34. Noyes FR. The function of the human anterior cruciate ligament and analysis of  
52 612 single- and double-bundle graft reconstructions. *Sports Health* 2009;1(1):66-75.  
53 613 doi: 10.1177/1941738108326980 [published Online First: 2009/01/01]  
54  
55 614 35. Ardern CL, Webster KE, Taylor NF, et al. Return to sport following anterior  
56 615 cruciate ligament reconstruction surgery: a systematic review and meta-analysis  
57 616 of the state of play. *Br J Sports Med* 2011;45(7):596-606. doi:  
58 617 10.1136/bjsm.2010.076364 [published Online First: 2011/03/15]  
59  
60

- 1  
2  
3 618 36. Claes S, Verdonk P, Forsyth R, et al. The "ligamentization" process in anterior  
4 619 cruciate ligament reconstruction: what happens to the human graft? A  
5 620 systematic review of the literature. *Am J Sports Med* 2011;39(11):2476-83. doi:  
6 621 10.1177/0363546511402662 [published Online First: 2011/04/26]
- 8 622 37. Wright RW, Gill CS, Chen L, et al. Outcome of revision anterior cruciate ligament  
9 623 reconstruction: a systematic review. *J Bone Joint Surg Am* 2012;94(6):531-6.  
10 624 doi: 10.2106/jbjs.K.00733 [published Online First: 2012/03/23]
- 12 625 38. Smith PA, Bozynski CC, Kuroki K, et al. Intra-Articular Biocompatibility of  
13 626 Multistranded, Long-Chain Polyethylene Suture Tape in a Canine ACL Model.  
14 627 *J Knee Surg* 2019;32(6):525-31. doi: 10.1055/s-0038-1655765 [published  
15 628 Online First: 2018/06/01]
- 17 629 39. Bachmaier S, Smith PA, Argintar EH, et al. Independent Suture Augmentation With  
18 630 All-Inside Anterior Cruciate Ligament Reconstruction Reduces Peak Loads on  
19 631 Soft-Tissue Graft. A Biomechanical Full-Construct Study. *Arthroscopy*  
20 632 2022;38(1):88-98. doi: 10.1016/j.arthro.2021.09.032 [published Online First:  
21 633 2021/10/17]
- 23 634 40. C EAM, Huntington LS, Tulloch S. Suture Tape Augmentation of Anterior Cruciate  
24 635 Ligament Reconstruction increases biomechanical stability: A Scoping Review  
25 636 of Biomechanical, Animal, and Clinical Studies. *Arthroscopy* 2022 doi:  
26 637 10.1016/j.arthro.2021.12.036 [published Online First: 2022/01/07]

29 638

31 639 **Fig.1** Study Flow Diagram.

33 640

35 641 **Fig.2** A and B are the models of the control group and test group, respectively. C and  
36 642 D are the pictures of the control group and test group after intraoperative arthroscopic  
37 643 ACLR, respectively.

1  
2  
3  
4  
5  
6  
7  
8  
9  
10  
11  
12  
13  
14  
15  
16  
17  
18  
19  
20  
21  
22  
23  
24  
25  
26  
27  
28  
29  
30  
31  
32  
33  
34  
35  
36  
37  
38  
39  
40  
41  
42  
43  
44  
45  
46  
47  
48  
49  
50  
51  
52  
53  
54  
55  
56  
57  
58  
59  
60

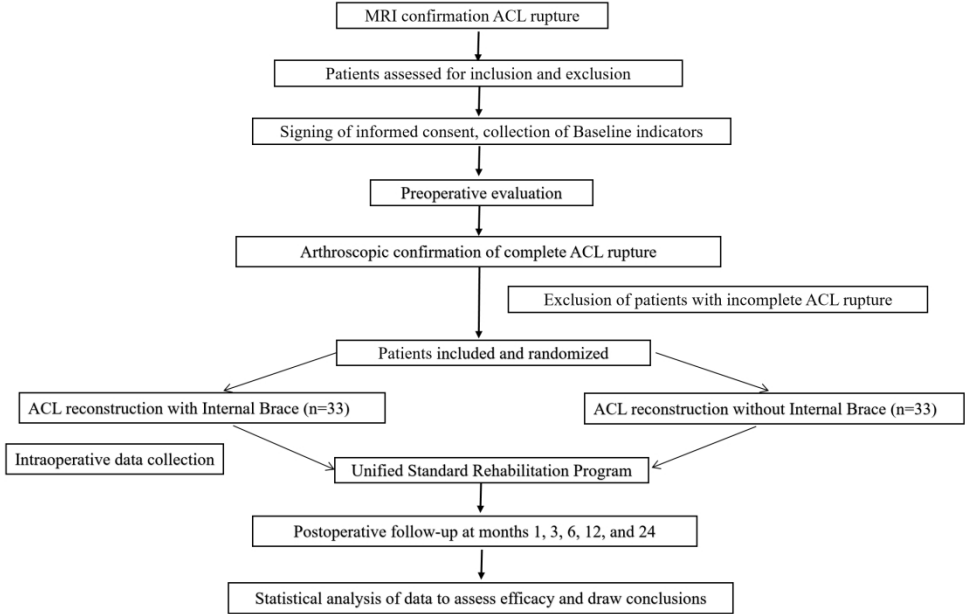

Study Flow Diagram.

731x467mm (76 x 76 DPI)

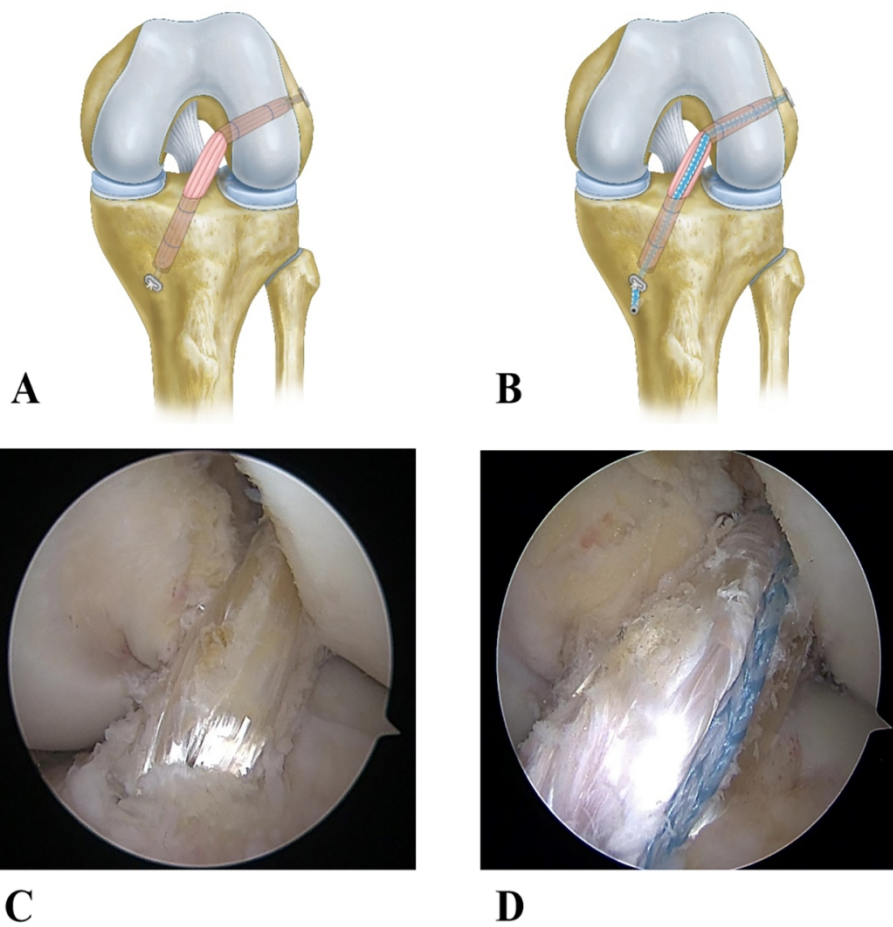

A and B are the models of the control group and test group, respectively. C and D are the pictures of the control group and test group after intraoperative arthroscopic ACLR, respectively.

253x253mm (138 x 138 DPI)

# Reporting checklist for protocol of a clinical trial.

Based on the SPIRIT guidelines.

## Instructions to authors

Complete this checklist by entering the page numbers from your manuscript where readers will find each of the items listed below.

Your article may not currently address all the items on the checklist. Please modify your text to include the missing information. If you are certain that an item does not apply, please write "n/a" and provide a short explanation.

Upload your completed checklist as an extra file when you submit to a journal.

In your methods section, say that you used the SPIRIT reporting guidelines, and cite them as:

Chan A-W, Tetzlaff JM, Gøtzsche PC, Altman DG, Mann H, Berlin J, Dickersin K, Hróbjartsson A, Schulz KF, Parulekar WR, Krleža-Jerić K, Laupacis A, Moher D. SPIRIT 2013 Explanation and Elaboration: Guidance for protocols of clinical trials. *BMJ*. 2013;346:e7586

|                                   |                     |                                                                                                              | Page   |
|-----------------------------------|---------------------|--------------------------------------------------------------------------------------------------------------|--------|
|                                   |                     | Reporting Item                                                                                               | Number |
| <b>Administrative information</b> |                     |                                                                                                              |        |
| Title                             | <a href="#">#1</a>  | Descriptive title identifying the study design, population, interventions, and, if applicable, trial acronym | 1      |
| Trial registration                | <a href="#">#2a</a> | Trial identifier and registry name. If not yet registered,                                                   | 2      |

|    |                     |                                                                                 |    |
|----|---------------------|---------------------------------------------------------------------------------|----|
| 1  |                     | name of intended registry                                                       |    |
| 2  |                     |                                                                                 |    |
| 3  |                     |                                                                                 |    |
| 4  | Trial registration: | <a href="#">#2b</a> All items from the World Health Organization Trial          | 2  |
| 5  |                     |                                                                                 |    |
| 6  | data set            | Registration Data Set                                                           |    |
| 7  |                     |                                                                                 |    |
| 8  |                     |                                                                                 |    |
| 9  | Protocol version    | <a href="#">#3</a> Date and version identifier                                  | 4  |
| 10 |                     |                                                                                 |    |
| 11 |                     |                                                                                 |    |
| 12 | Funding             | <a href="#">#4</a> Sources and types of financial, material, and other          | 11 |
| 13 |                     | support                                                                         |    |
| 14 |                     |                                                                                 |    |
| 15 |                     |                                                                                 |    |
| 16 |                     |                                                                                 |    |
| 17 | Roles and           | <a href="#">#5a</a> Names, affiliations, and roles of protocol contributors     | 1  |
| 18 |                     |                                                                                 |    |
| 19 | responsibilities:   |                                                                                 |    |
| 20 |                     |                                                                                 |    |
| 21 | contributorship     |                                                                                 |    |
| 22 |                     |                                                                                 |    |
| 23 |                     |                                                                                 |    |
| 24 |                     |                                                                                 |    |
| 25 | Roles and           | <a href="#">#5b</a> Name and contact information for the trial sponsor          | 11 |
| 26 |                     |                                                                                 |    |
| 27 | responsibilities:   |                                                                                 |    |
| 28 |                     |                                                                                 |    |
| 29 | sponsor contact     |                                                                                 |    |
| 30 |                     |                                                                                 |    |
| 31 | information         |                                                                                 |    |
| 32 |                     |                                                                                 |    |
| 33 |                     |                                                                                 |    |
| 34 |                     |                                                                                 |    |
| 35 | Roles and           | <a href="#">#5c</a> Role of study sponsor and funders, if any, in study design; | 11 |
| 36 |                     | collection, management, analysis, and interpretation of                         |    |
| 37 | responsibilities:   | data; writing of the report; and the decision to submit the                     |    |
| 38 |                     | report for publication, including whether they will have                        |    |
| 39 | sponsor and funder  | ultimate authority over any of these activities                                 |    |
| 40 |                     |                                                                                 |    |
| 41 |                     |                                                                                 |    |
| 42 |                     |                                                                                 |    |
| 43 |                     |                                                                                 |    |
| 44 |                     |                                                                                 |    |
| 45 |                     |                                                                                 |    |
| 46 |                     |                                                                                 |    |
| 47 | Roles and           | <a href="#">#5d</a> Composition, roles, and responsibilities of the             | 11 |
| 48 |                     | coordinating centre, steering committee, endpoint                               |    |
| 49 | responsibilities:   | adjudication committee, data management team, and                               |    |
| 50 |                     | other individuals or groups overseeing the trial, if                            |    |
| 51 | committees          | applicable (see Item 21a for data monitoring committee)                         |    |
| 52 |                     |                                                                                 |    |
| 53 |                     |                                                                                 |    |
| 54 |                     |                                                                                 |    |
| 55 |                     |                                                                                 |    |
| 56 |                     |                                                                                 |    |
| 57 |                     |                                                                                 |    |
| 58 |                     |                                                                                 |    |
| 59 |                     |                                                                                 |    |
| 60 |                     |                                                                                 |    |



1 **Introduction**  
2  
3

4 **Background and** [#6a](#) Description of research question and justification for 3  
5  
6 rationale  
7 undertaking the trial, including summary of relevant  
8 studies (published and unpublished) examining benefits  
9 and harms for each intervention  
10  
11  
12

14 **Background and** [#6b](#) Explanation for choice of comparators 3  
15  
16 rationale: choice of  
17 comparators  
18  
19  
20  
21

22 **Objectives** [#7](#) Specific objectives or hypotheses 3  
23  
24

25 **Trial design** [#8](#) Description of trial design including type of trial (eg, 2  
26  
27 parallel group, crossover, factorial, single group),  
28 allocation ratio, and framework (eg, superiority,  
29 equivalence, non-inferiority, exploratory)  
30  
31  
32  
33  
34

35 **Methods:**  
36

37 **Participants,**  
38  
39 **interventions, and**  
40  
41 **outcomes**  
42  
43  
44

45 **Study setting** [#9](#) Description of study settings (eg, community clinic, 4  
46  
47 academic hospital) and list of countries where data will be  
48 collected. Reference to where list of study sites can be  
49 obtained  
50  
51  
52  
53

54 **Eligibility criteria** [#10](#) Inclusion and exclusion criteria for participants. If 4  
55  
56 applicable, eligibility criteria for study centres and  
57  
58  
59  
60

|    |                      |                                                                                   |     |
|----|----------------------|-----------------------------------------------------------------------------------|-----|
| 1  |                      | individuals who will perform the interventions (eg,                               |     |
| 2  |                      | surgeons, psychotherapists)                                                       |     |
| 3  |                      |                                                                                   |     |
| 4  |                      |                                                                                   |     |
| 5  |                      |                                                                                   |     |
| 6  | Interventions:       | <a href="#">#11a</a> Interventions for each group with sufficient detail to allow | 5-6 |
| 7  |                      |                                                                                   |     |
| 8  | description          | replication, including how and when they will be                                  |     |
| 9  |                      |                                                                                   |     |
| 10 |                      | administered                                                                      |     |
| 11 |                      |                                                                                   |     |
| 12 |                      |                                                                                   |     |
| 13 | Interventions:       | <a href="#">#11b</a> Criteria for discontinuing or modifying allocated            | 5-6 |
| 14 |                      |                                                                                   |     |
| 15 | modifications        | interventions for a given trial participant (eg, drug dose                        |     |
| 16 |                      | change in response to harms, participant request, or                              |     |
| 17 |                      | improving / worsening disease)                                                    |     |
| 18 |                      |                                                                                   |     |
| 19 |                      |                                                                                   |     |
| 20 |                      |                                                                                   |     |
| 21 |                      |                                                                                   |     |
| 22 |                      |                                                                                   |     |
| 23 | Interventions:       | <a href="#">#11c</a> Strategies to improve adherence to intervention protocols,   | 5-6 |
| 24 |                      |                                                                                   |     |
| 25 | adherence            | and any procedures for monitoring adherence (eg, drug                             |     |
| 26 |                      | tablet return; laboratory tests)                                                  |     |
| 27 |                      |                                                                                   |     |
| 28 |                      |                                                                                   |     |
| 29 |                      |                                                                                   |     |
| 30 |                      |                                                                                   |     |
| 31 | Interventions:       | <a href="#">#11d</a> Relevant concomitant care and interventions that are         | 5-6 |
| 32 |                      |                                                                                   |     |
| 33 | concomitant care     | permitted or prohibited during the trial                                          |     |
| 34 |                      |                                                                                   |     |
| 35 |                      |                                                                                   |     |
| 36 | Outcomes             | <a href="#">#12</a> Primary, secondary, and other outcomes, including the         | 6-7 |
| 37 |                      |                                                                                   |     |
| 38 |                      | specific measurement variable (eg, systolic blood                                 |     |
| 39 |                      | pressure), analysis metric (eg, change from baseline, final                       |     |
| 40 |                      | value, time to event), method of aggregation (eg, median,                         |     |
| 41 |                      | proportion), and time point for each outcome. Explanation                         |     |
| 42 |                      | of the clinical relevance of chosen efficacy and harm                             |     |
| 43 |                      | outcomes is strongly recommended                                                  |     |
| 44 |                      |                                                                                   |     |
| 45 |                      |                                                                                   |     |
| 46 |                      |                                                                                   |     |
| 47 |                      |                                                                                   |     |
| 48 |                      |                                                                                   |     |
| 49 |                      |                                                                                   |     |
| 50 |                      |                                                                                   |     |
| 51 |                      |                                                                                   |     |
| 52 |                      |                                                                                   |     |
| 53 | Participant timeline | <a href="#">#13</a> Time schedule of enrolment, interventions (including any      | 6-7 |
| 54 |                      |                                                                                   |     |
| 55 |                      | run-ins and washouts), assessments, and visits for                                |     |
| 56 |                      |                                                                                   |     |
| 57 |                      | participants. A schematic diagram is highly recommended                           |     |
| 58 |                      |                                                                                   |     |
| 59 |                      |                                                                                   |     |
| 60 |                      |                                                                                   |     |

(see Figure)

|    |                           |                      |                                                               |
|----|---------------------------|----------------------|---------------------------------------------------------------|
| 1  |                           |                      |                                                               |
| 2  |                           |                      |                                                               |
| 3  |                           |                      |                                                               |
| 4  | Sample size               | <a href="#">#14</a>  | Estimated number of participants needed to achieve 4          |
| 5  |                           |                      |                                                               |
| 6  |                           |                      | study objectives and how it was determined, including         |
| 7  |                           |                      |                                                               |
| 8  |                           |                      | clinical and statistical assumptions supporting any sample    |
| 9  |                           |                      |                                                               |
| 10 |                           |                      | size calculations                                             |
| 11 |                           |                      |                                                               |
| 12 |                           |                      |                                                               |
| 13 | Recruitment               | <a href="#">#15</a>  | Strategies for achieving adequate participant enrolment to 4  |
| 14 |                           |                      |                                                               |
| 15 |                           |                      |                                                               |
| 16 |                           |                      | reach target sample size                                      |
| 17 |                           |                      |                                                               |
| 18 |                           |                      |                                                               |
| 19 | <b>Methods:</b>           |                      |                                                               |
| 20 |                           |                      |                                                               |
| 21 | <b>Assignment of</b>      |                      |                                                               |
| 22 |                           |                      |                                                               |
| 23 | <b>interventions (for</b> |                      |                                                               |
| 24 |                           |                      |                                                               |
| 25 | <b>controlled trials)</b> |                      |                                                               |
| 26 |                           |                      |                                                               |
| 27 |                           |                      |                                                               |
| 28 |                           |                      |                                                               |
| 29 | Allocation: sequence      | <a href="#">#16a</a> | Method of generating the allocation sequence (eg, 4-5         |
| 30 | generation                |                      | computer-generated random numbers), and list of any           |
| 31 |                           |                      |                                                               |
| 32 |                           |                      | factors for stratification. To reduce predictability of a     |
| 33 |                           |                      |                                                               |
| 34 |                           |                      | random sequence, details of any planned restriction (eg,      |
| 35 |                           |                      |                                                               |
| 36 |                           |                      | blocking) should be provided in a separate document that      |
| 37 |                           |                      |                                                               |
| 38 |                           |                      | is unavailable to those who enrol participants or assign      |
| 39 |                           |                      |                                                               |
| 40 |                           |                      | interventions                                                 |
| 41 |                           |                      |                                                               |
| 42 |                           |                      |                                                               |
| 43 |                           |                      |                                                               |
| 44 |                           |                      |                                                               |
| 45 | Allocation                | <a href="#">#16b</a> | Mechanism of implementing the allocation sequence (eg, 4-5    |
| 46 | concealment               |                      | central telephone; sequentially numbered, opaque, sealed      |
| 47 |                           |                      |                                                               |
| 48 | mechanism                 |                      | envelopes), describing any steps to conceal the sequence      |
| 49 |                           |                      |                                                               |
| 50 |                           |                      | until interventions are assigned                              |
| 51 |                           |                      |                                                               |
| 52 |                           |                      |                                                               |
| 53 |                           |                      |                                                               |
| 54 |                           |                      |                                                               |
| 55 | Allocation:               | <a href="#">#16c</a> | Who will generate the allocation sequence, who will enrol 4-5 |
| 56 | implementation            |                      | participants, and who will assign participants to             |
| 57 |                           |                      |                                                               |
| 58 |                           |                      |                                                               |
| 59 |                           |                      |                                                               |
| 60 |                           |                      |                                                               |

|    |                        |                                                                                 |     |
|----|------------------------|---------------------------------------------------------------------------------|-----|
| 1  |                        | interventions                                                                   |     |
| 2  |                        |                                                                                 |     |
| 3  |                        |                                                                                 |     |
| 4  | Blinding (masking)     | <a href="#">#17a</a> Who will be blinded after assignment to interventions (eg, | 4-5 |
| 5  |                        | trial participants, care providers, outcome assessors, data                     |     |
| 6  |                        | analysts), and how                                                              |     |
| 7  |                        |                                                                                 |     |
| 8  |                        |                                                                                 |     |
| 9  |                        |                                                                                 |     |
| 10 |                        |                                                                                 |     |
| 11 | Blinding (masking):    | <a href="#">#17b</a> If blinded, circumstances under which unblinding is        | 4-5 |
| 12 |                        | emergency                                                                       |     |
| 13 |                        | permissible, and procedure for revealing a participant's                        |     |
| 14 | unblinding             | allocated intervention during the trial                                         |     |
| 15 |                        |                                                                                 |     |
| 16 |                        |                                                                                 |     |
| 17 |                        |                                                                                 |     |
| 18 |                        |                                                                                 |     |
| 19 | <b>Methods: Data</b>   |                                                                                 |     |
| 20 |                        |                                                                                 |     |
| 21 | <b>collection,</b>     |                                                                                 |     |
| 22 |                        |                                                                                 |     |
| 23 | <b>management, and</b> |                                                                                 |     |
| 24 |                        |                                                                                 |     |
| 25 | <b>analysis</b>        |                                                                                 |     |
| 26 |                        |                                                                                 |     |
| 27 |                        |                                                                                 |     |
| 28 |                        |                                                                                 |     |
| 29 | Data collection plan   | <a href="#">#18a</a> Plans for assessment and collection of outcome,            | 7   |
| 30 |                        | baseline, and other trial data, including any related                           |     |
| 31 |                        | processes to promote data quality (eg, duplicate                                |     |
| 32 |                        | measurements, training of assessors) and a description of                       |     |
| 33 |                        | study instruments (eg, questionnaires, laboratory tests)                        |     |
| 34 |                        | along with their reliability and validity, if known. Reference                  |     |
| 35 |                        | to where data collection forms can be found, if not in the                      |     |
| 36 |                        | protocol                                                                        |     |
| 37 |                        |                                                                                 |     |
| 38 |                        |                                                                                 |     |
| 39 |                        |                                                                                 |     |
| 40 |                        |                                                                                 |     |
| 41 |                        |                                                                                 |     |
| 42 |                        |                                                                                 |     |
| 43 |                        |                                                                                 |     |
| 44 |                        |                                                                                 |     |
| 45 |                        |                                                                                 |     |
| 46 |                        |                                                                                 |     |
| 47 |                        |                                                                                 |     |
| 48 | Data collection plan:  | <a href="#">#18b</a> Plans to promote participant retention and complete        | 7   |
| 49 | retention              | follow-up, including list of any outcome data to be                             |     |
| 50 |                        | collected for participants who discontinue or deviate from                      |     |
| 51 |                        | intervention protocols                                                          |     |
| 52 |                        |                                                                                 |     |
| 53 |                        |                                                                                 |     |
| 54 |                        |                                                                                 |     |
| 55 |                        |                                                                                 |     |
| 56 |                        |                                                                                 |     |
| 57 |                        |                                                                                 |     |
| 58 | Data management        | <a href="#">#19</a> Plans for data entry, coding, security, and storage,        | 7   |
| 59 |                        |                                                                                 |     |
| 60 |                        |                                                                                 |     |

including any related processes to promote data quality  
(eg, double data entry; range checks for data values).

Reference to where details of data management  
procedures can be found, if not in the protocol

10 Statistics: outcomes [#20a](#) Statistical methods for analysing primary and secondary 8-9

11 outcomes. Reference to where other details of the  
12 statistical analysis plan can be found, if not in the protocol

18 Statistics: additional [#20b](#) Methods for any additional analyses (eg, subgroup and 8-9  
19 analyses adjusted analyses)

23 Statistics: analysis [#20c](#) Definition of analysis population relating to protocol non- 8-9

24 population and adherence (eg, as randomised analysis), and any  
25 missing data statistical methods to handle missing data (eg, multiple  
26 imputation)

### 33 Methods: Monitoring

36 Data monitoring: [#21a](#) Composition of data monitoring committee (DMC); 7

37 formal committee summary of its role and reporting structure; statement of  
38 whether it is independent from the sponsor and  
39 competing interests; and reference to where further  
40 details about its charter can be found, if not in the  
41 protocol. Alternatively, an explanation of why a DMC is  
42 not needed

53 Data monitoring: [#21b](#) Description of any interim analyses and stopping 7

54 interim analysis guidelines, including who will have access to these  
55 interim results and make the final decision to terminate

|    |                      |                                                                                 |            |
|----|----------------------|---------------------------------------------------------------------------------|------------|
| 1  |                      | the trial                                                                       |            |
| 2  |                      |                                                                                 |            |
| 3  |                      |                                                                                 |            |
| 4  | Harms                | <a href="#">#22</a> Plans for collecting, assessing, reporting, and managing    | 7          |
| 5  |                      | solicited and spontaneously reported adverse events and                         |            |
| 6  |                      | other unintended effects of trial interventions or trial                        |            |
| 7  |                      | conduct                                                                         |            |
| 8  |                      |                                                                                 |            |
| 9  |                      |                                                                                 |            |
| 10 |                      |                                                                                 |            |
| 11 |                      |                                                                                 |            |
| 12 |                      |                                                                                 |            |
| 13 | Auditing             | <a href="#">#23</a> Frequency and procedures for auditing trial conduct, if     | 7          |
| 14 |                      | any, and whether the process will be independent from                           |            |
| 15 |                      | investigators and the sponsor                                                   |            |
| 16 |                      |                                                                                 |            |
| 17 |                      |                                                                                 |            |
| 18 |                      |                                                                                 |            |
| 19 |                      |                                                                                 |            |
| 20 |                      |                                                                                 |            |
| 21 | <b>Ethics and</b>    |                                                                                 |            |
| 22 |                      |                                                                                 |            |
| 23 | <b>dissemination</b> |                                                                                 |            |
| 24 |                      |                                                                                 |            |
| 25 |                      |                                                                                 |            |
| 26 | Research ethics      | <a href="#">#24</a> Plans for seeking research ethics committee / institutional | 10         |
| 27 |                      | review board (REC / IRB) approval                                               |            |
| 28 | approval             |                                                                                 |            |
| 29 |                      |                                                                                 |            |
| 30 |                      |                                                                                 |            |
| 31 | Protocol             | <a href="#">#25</a> Plans for communicating important protocol modifications    | 10         |
| 32 |                      | (eg, changes to eligibility criteria, outcomes, analyses) to                    |            |
| 33 | amendments           | relevant parties (eg, investigators, REC / IRBs, trial                          |            |
| 34 |                      | participants, trial registries, journals, regulators)                           |            |
| 35 |                      |                                                                                 |            |
| 36 |                      |                                                                                 |            |
| 37 |                      |                                                                                 |            |
| 38 |                      |                                                                                 |            |
| 39 |                      |                                                                                 |            |
| 40 |                      |                                                                                 |            |
| 41 | Consent or assent    | <a href="#">#26a</a> Who will obtain informed consent or assent from potential  | 10         |
| 42 |                      | trial participants or authorised surrogates, and how (see                       |            |
| 43 |                      | Item 32)                                                                        |            |
| 44 |                      |                                                                                 |            |
| 45 |                      |                                                                                 |            |
| 46 |                      |                                                                                 |            |
| 47 |                      |                                                                                 |            |
| 48 |                      |                                                                                 |            |
| 49 | Consent or assent:   | <a href="#">#26b</a> Additional consent provisions for collection and use of    | Not        |
| 50 |                      | participant data and biological specimens in ancillary                          |            |
| 51 | ancillary studies    | studies, if applicable                                                          | applicable |
| 52 |                      |                                                                                 |            |
| 53 |                      |                                                                                 |            |
| 54 |                      |                                                                                 |            |
| 55 |                      |                                                                                 |            |
| 56 |                      |                                                                                 |            |
| 57 | Confidentiality      | <a href="#">#27</a> How personal information about potential and enrolled       | 7          |
| 58 |                      |                                                                                 |            |
| 59 |                      |                                                                                 |            |
| 60 |                      |                                                                                 |            |

1 participants will be collected, shared, and maintained in  
 2 order to protect confidentiality before, during, and after  
 3 the trial  
 4  
 5  
 6  
 7

8 Declaration of [#28](#) Financial and other competing interests for principal 11  
 9 interests investigators for the overall trial and each study site  
 10  
 11  
 12

13 Data access [#29](#) Statement of who will have access to the final trial 10  
 14 dataset, and disclosure of contractual agreements that  
 15 limit such access for investigators  
 16  
 17  
 18  
 19  
 20

21 Ancillary and post [#30](#) Provisions, if any, for ancillary and post-trial care, and for 7  
 22 trial care compensation to those who suffer harm from trial  
 23 participation  
 24  
 25  
 26  
 27

28 Dissemination policy: [#31a](#) Plans for investigators and sponsor to communicate trial 10  
 29 trial results results to participants, healthcare professionals, the  
 30 public, and other relevant groups (eg, via publication,  
 31 reporting in results databases, or other data sharing  
 32 arrangements), including any publication restrictions  
 33  
 34  
 35  
 36  
 37  
 38  
 39  
 40

41 Dissemination policy: [#31b](#) Authorship eligibility guidelines and any intended use of 10  
 42 authorship professional writers  
 43  
 44  
 45

46 Dissemination policy: [#31c](#) Plans, if any, for granting public access to the full 10  
 47 reproducible protocol, participant-level dataset, and statistical code  
 48 research  
 49  
 50  
 51  
 52  
 53

## 54 Appendices

55  
 56  
 57 Informed consent [#32](#) Model consent form and other related documentation 10  
 58  
 59  
 60



1 materials given to participants and authorised surrogates  
2  
3  
4 Biological specimens [#33](#) Plans for collection, laboratory evaluation, and storage of Not  
5  
6 biological specimens for genetic or molecular analysis in applicable  
7  
8 the current trial and for future use in ancillary studies, if  
9  
10 applicable  
11  
12

13 None The SPIRIT Explanation and Elaboration paper is distributed under the terms of the Creative  
14 Commons Attribution License CC-BY-NC. This checklist can be completed online using  
15  
16 <https://www.goodreports.org/>, a tool made by the [EQUATOR Network](#) in collaboration with  
17  
18 [Penelope.ai](#)  
19  
20  
21  
22  
23  
24  
25  
26  
27  
28  
29  
30  
31  
32  
33  
34  
35  
36  
37  
38  
39  
40  
41  
42  
43  
44  
45  
46  
47  
48  
49  
50  
51  
52  
53  
54  
55  
56  
57  
58  
59  
60

# BMJ Open

## Internal brace augmentation reconstruction versus standard anterior cruciate ligament reconstruction : A randomized controlled clinical trial study protocol

|                                 |                                                                                                                                                                                                                                                                                                                                                                                                                                                                                                                                                                                                                                                                                                                                                                                                                                                                                                                                                                                                     |
|---------------------------------|-----------------------------------------------------------------------------------------------------------------------------------------------------------------------------------------------------------------------------------------------------------------------------------------------------------------------------------------------------------------------------------------------------------------------------------------------------------------------------------------------------------------------------------------------------------------------------------------------------------------------------------------------------------------------------------------------------------------------------------------------------------------------------------------------------------------------------------------------------------------------------------------------------------------------------------------------------------------------------------------------------|
| Journal:                        | <i>BMJ Open</i>                                                                                                                                                                                                                                                                                                                                                                                                                                                                                                                                                                                                                                                                                                                                                                                                                                                                                                                                                                                     |
| Manuscript ID                   | bmjopen-2022-065254.R2                                                                                                                                                                                                                                                                                                                                                                                                                                                                                                                                                                                                                                                                                                                                                                                                                                                                                                                                                                              |
| Article Type:                   | Protocol                                                                                                                                                                                                                                                                                                                                                                                                                                                                                                                                                                                                                                                                                                                                                                                                                                                                                                                                                                                            |
| Date Submitted by the Author:   | 05-Dec-2023                                                                                                                                                                                                                                                                                                                                                                                                                                                                                                                                                                                                                                                                                                                                                                                                                                                                                                                                                                                         |
| Complete List of Authors:       | Lu, Wenhao; Xiangya Hospital Central South University, Department of Orthopaedics<br>Liu, Di; Xiangya Hospital Central South University, Department of Orthopaedics<br>Cai, Zijun; Xiangya Hospital Central South University, Department of Orthopedics<br>Pan, Linyuan; Xiangya Hospital Central South University, Department of Orthopedics<br>Xie, Wenqing; Xiangya Hospital Central South University, Department of Orthopedics<br>Jin, Hongfu; Xiangya Hospital Central South University, Department of Orthopaedics<br>Liu, Xu; Xiangya Hospital Central South University, Department of Orthopaedics<br>Li, Yusheng; Xiangya Hospital Central South University, Department of Orthopaedics; Xiangya Hospital Central South University National Clinical Research Center for Geriatric Disorders<br>Xiao, Wenfeng; Xiangya Hospital Central South University, Department of Orthopaedics; Xiangya Hospital Central South University National Clinical Research Center for Geriatric Disorders |
| <b>Primary Subject Heading</b>: | Sports and exercise medicine                                                                                                                                                                                                                                                                                                                                                                                                                                                                                                                                                                                                                                                                                                                                                                                                                                                                                                                                                                        |
| Secondary Subject Heading:      | Surgery                                                                                                                                                                                                                                                                                                                                                                                                                                                                                                                                                                                                                                                                                                                                                                                                                                                                                                                                                                                             |
| Keywords:                       | Knee < ORTHOPAEDIC & TRAUMA SURGERY, Orthopaedic sports trauma < ORTHOPAEDIC & TRAUMA SURGERY, Orthopaedic & trauma surgery < SURGERY, Clinical trials < THERAPEUTICS, Adult orthopaedics < ORTHOPAEDIC & TRAUMA SURGERY                                                                                                                                                                                                                                                                                                                                                                                                                                                                                                                                                                                                                                                                                                                                                                            |
|                                 |                                                                                                                                                                                                                                                                                                                                                                                                                                                                                                                                                                                                                                                                                                                                                                                                                                                                                                                                                                                                     |

SCHOLARONE™  
Manuscripts

1  
2  
3  
4 **1 Internal brace augmentation reconstruction versus**  
5 **2 standard anterior cruciate ligament reconstruction :**  
6 **3 A randomized controlled clinical trial study protocol**  
7  
8  
9

10  
11  
12 5 Wenhao Lu<sup>1,2</sup>, Di Liu<sup>1,2</sup>, Zijun Cai<sup>1,2</sup>, Linyuan Pan<sup>1,2</sup>, Wenqing Xie<sup>1,2</sup>, Hongfu Jin<sup>1,2</sup>,  
13 6 Xu Liu<sup>1,2</sup>, Yusheng Li<sup>1,2</sup>, Wenfeng Xiao<sup>1,2</sup>.  
14

15  
16  
17 8 <sup>1</sup> Department of Orthopaedics, Xiangya Hospital, Central South University, Changsha  
18 9 410008, Hunan, China.

19  
20 10 <sup>2</sup> National Clinical Research Center for Geriatric Disorders, Xiangya Hospital, Central  
21 11 South University, Changsha 410008, Hunan, China.  
22

23  
24  
25 13 Correspondence to:

26  
27 14 Wenfeng Xiao, [xiaowenfeng@csu.edu.cn](mailto:xiaowenfeng@csu.edu.cn); and Yusheng Li, [liyusheng@csu.edu.cn](mailto:liyusheng@csu.edu.cn)  
28  
29  
30  
31  
32  
33  
34  
35  
36  
37  
38  
39  
40  
41  
42  
43  
44  
45  
46  
47  
48  
49  
50  
51  
52  
53  
54  
55  
56  
57  
58  
59  
60

## Abstract:

**Introduction:** Anterior cruciate ligament (ACL) rupture is one of the most common knee injuries in sports, and the gold standard for treating ACL rupture is tendon graft reconstruction. Internal brace technology is being used nowadays for ligament repair; however, more relevant *in vivo* clinical evidence is required for using internal brace technology in ACL reconstruction (ACLR). We conducted a randomized controlled trial to investigate the clinical efficacy of internal brace technology in ACLR.

**Methods and analysis:** This randomized, parallel-controlled trial included patients with ACL rupture who underwent inpatient surgery at the Department of Orthopedics, Xiangya Hospital, Central South University. Random number table method was used to assign the participants to either the test or the control group. The test group underwent ACLR using the internal brace technique, whereas the control group underwent standard ACLR. Uniform postoperative rehabilitation protocol was used for both the groups. Patient-reported outcomes included preoperative baseline and postoperative recovery at 1, 3, 6, 12, and 24 months. The primary outcome was International Knee Documentation Committee (IKDC) function from baseline (ACL rupture) to six-months postoperatively. Secondary outcomes included (I) other patient outcome reporting metrics, Lysholm knee score (LKS), Knee Injury and Osteoarthritis Outcome Score (KOOS), and Visual Analog Scale (VAS); (II) the use of Kneelax3 knee stabilizer to assess knee stability; (III) occurrence of adverse events, such as graft refraction or symptomatic instability, postoperative infection, and contralateral injury; and (IV) magnetic resonance images at 12 and 24 months after ACLR.

**Ethics and dissemination:** This trial was approved by the Medical Ethics Committee of the Xiangya Hospital of Central South University on October 26, 2021. Data will be published in peer-reviewed journals and presented at national and international conferences.

**Trial registration number:** ChiCTR2200057526.

1  
2  
3  
4 44 **Strengths and limitations of this study:**

5  
6 45 This study aims to demonstrate the clinical superiority of internal braces over  
7 46 conventional ACL reconstruction (ACLR) over a 2-year follow-up period.

8  
9 47 This study will fill an existing gap regarding the efficacy of internal braces in ACLR  
10 48 by providing robust and high-quality evidence of its role and impact.

11  
12 49 This study used a standard and detailed rehabilitation program to ensure smooth  
13 50 recovery after ACLR.

14  
15 51 The single-center design of the trial will result in data to lack generalizability.

16  
17 52

18  
19  
20  
21  
22  
23  
24  
25  
26  
27  
28  
29  
30  
31  
32  
33  
34  
35  
36  
37  
38  
39  
40  
41  
42  
43  
44  
45  
46  
47  
48  
49  
50  
51  
52  
53  
54  
55  
56  
57  
58  
59  
60

For peer review only

## 53 Introduction

54 Anterior cruciate ligament (ACL) rupture is one of the most common knee ligament  
55 injuries occurring in young athletes. Mayo-Robson of Leeds performed the first ACL  
56 repair in 1895, which was followed by initiation of ACL reconstruction (ACLR) using  
57 autologous tissue by Grekow and Hey Groves between 1914-1920.[1] If ACL ruptures  
58 are not actively treated after injury, joint instability and other phenomena often occur,  
59 which reduces the quality of life and increases the risk of osteoarthritis.[2-4] Over the  
60 past few decades, ACL ruptures have been estimated to occur in approximately 30–52  
61 cases per 100,000 person-years.[5] ACL injuries reportedly occur in more than 175,000  
62 people annually in the United States, and approximately 100,000 undergo surgery.[6-  
63 8] With the continuous development of surgical techniques, the current mainstream  
64 surgical method involves performing ACLR under arthroscopy.[9] A Japanese study  
65 reported that the re-disruption rate of ACLR grafts after returning to the field was 23%  
66 for rugby players under the age of 20 years.[10] At the same time, other studies have  
67 also shown that the revision rate of ACLR with an allogeneic tendon in adolescents can  
68 reach 35%;[11] however, the effect after revision is not as good as that of primary  
69 ACLR.[12]

70 Internal brace technology for ligament repair has been promoted since 2010. It uses  
71 braided ultrahigh molecular weight polyethylene (UHMWPE) polyester suture tape and  
72 knotless bone anchors to reinforce ligament strength, also known as an auxiliary  
73 stabilizing structure for recovery of motion after ligament repair, which helps prevent  
74 secondary damage,[13] such as anterior and posterior cruciate ligament, medial and  
75 lateral collateral ligament repair of the knee,[13-15] and ankle and elbow ligament  
76 strengthening repair.[16, 17] Enhanced collateral ligament repair and reconstruction  
77 with an internal brace improves limb biomechanics, including greater stiffness and  
78 maximum load, while facilitating early rehabilitation in motor and biomechanical  
79 environments.[12, 14] Reinforced ligament repair offers unique advantages over  
80 traditional reconstruction techniques, including smaller bores and implants, no risk of  
81 disease transmission from the allografts, and no risk of tunnel convergence during the  
82 procedure. [14, 18, 19] Therefore, ACL reinforcement is an alternative method for  
83 synergistically supporting ACL grafts and load-sharing, with primary tension on the  
84 graft and high-strength suture tape.

85 In ACLR, the internal brace ligament augmentation technique helps prevent various  
86 failure scenarios, including creep and irreversible stretching, traumatic tears, and  
87 slippage of the tendon-bone interface.[20, 21] In addition, these failures can be avoided  
88 when the graft is small or vulnerable.[20, 21] Smith in an *in vitro* trial conducted in  
89 2018 found that ACLR combined with independent suture tape significantly reduced  
90 graft elongation and allowed the grafted ligaments to accept higher ultimate disruption  
91 loads, thereby reducing the risk of graft rerupture.[20] Preliminary short-term studies  
92 have shown that the internal brace technique can significantly improve functional  
93 recovery after ACLR, thereby enhancing the patient's quality of life. However, only a  
94 few medical institutions use ACLR combined with internal brace technique, and more  
95 relevant *in vivo* clinical evidence is required.

96 This study was undertaken with an aim to fill this gap by exploring whether internal  
97 brace technology can improve the outcomes of patients with ligament injuries and  
98 provide a new option for patients with ACL injuries.

## 99 **Methods and analysis**

### 100 **Study setting**

101 This randomized parallel-controlled trial will be conducted in accordance with the  
102 CONSORT statement.[22] Patients with ACL rupture who were hospitalized in the  
103 Department of Orthopedics at Xiangya Hospital of Central South University between  
104 March 1, 2022 and February 28, 2023 formed our study population. The Medical Ethics  
105 Committee of Xiangya Hospital of Central South University approved the ethical  
106 application related to this study and filed it (ethical approval number: 202110478). All  
107 patients signed an informed consent form prior to the surgery.

### 108 **Eligibility criteria**

109 The inclusion criteria were: (1) age: 16-45 years; (2) unilateral knee magnetic resonance  
110 imaging (MRI) showing unilateral knee ACL fracture; (3) combined meniscal injury  
111 that does not interfere with the standard postoperative rehabilitation program after  
112 intraoperative management; (4) combined grade III or lower cartilage injury that does  
113 not interfere with the standard postoperative rehabilitation program; (5) a minimum of  
114 24 months of follow-up; (6) no previous injury to the healthy knee; (7) informed  
115 consent provided by the participant and signed relevant documents.

116 The exclusion criteria were: (1) age of <16 years or >45 years; (2) previous ACLR or  
117 bilateral ACL injury; (3) MRI revealing posterior cruciate ligament (PCL), medial  
118 collateral ligament (MCL), or lateral collateral ligament (LCL) injury; (4) grade IV  
119 cartilage injury or unstable longitudinal meniscus tear requiring repair that interferes  
120 with standard rehabilitation protocols after surgical management; (5) not meeting the  
121 requirement of 24 follow-up visits; (6) patients with severe underlying medical  
122 conditions that make surgery inadvisable, or patients with mental illness, pregnancy  
123 during planned trials, or other conditions that are not conducive for long-term follow-  
124 up.

### 125 **Participant selection:**

126 Patients diagnosed with ACL rupture by clinicians through physical examination and  
127 MRI were randomly allocated to the trial and control groups after final confirmation of  
128 ACL rupture under arthroscopy and agreeing to participate in this study. The trial group  
129 underwent ACLR with the internal brace technique, while the control group underwent  
130 ACLR without the internal brace technique. Preoperative assessment of the patients  
131 was performed before surgery, and a uniform rehabilitation program was performed  
132 after surgery. The inclusion start date of the protocol (version 1.0, March 2022) was  
133 March 2022, with an expected cutoff date of March 2023. The follow-up period is 2  
134 years, with the last follow-up expected in March 2025 (the exact end date will be based  
135 on the inclusion of the last participant). The specific technical route is shown in **Fig. 1**.

### 136 **Study sample**

137 International Knee Documentation Committee (IKDC) score consists of three aspects:  
138 1) symptoms, including pain, stiffness, swelling, interlocking/jamming, and softening  
139 of the legs; 2) motion and daily activities; and 3) current knee function. However, knee  
140 function prior to knee injury does not count towards the total score, which is the main  
141 outcome indicator of this study, based on which the sample size required for this trial  
142 was estimated. IKDC scores are continuous measurement data, and this study compares



1  
2  
3 143 the statistical differences between the means  $\pm$  standard deviations of the two groups.  
4 144 The minimum clinically important difference (MCID) of the IKDC scale was reported  
5 145 to range between 8.8-15.6.[23-25] We set  $\delta$  to 10, and the overall sample standard  
6 146 deviation was set to 13 based on the relevant literature.[23-25] To satisfy the power of  
7 147 a test ( $1-\beta$ ,  $\beta$  means type II error) of 0.8 and the test level  $\alpha$  (type I error) of 0.05, the  
8 148 sample size calculated for each group was 27 according to the following formula.  
9 149 Considering a 20% lost visit rate, 33 patients were included in each group with a total  
10 150 of 66 patients included in the study.

### 151 **Randomization and Concealed Grouping**

152 Using a computer-generated random number list, all eligible participants were  
153 randomly assigned in a 1:1 ratio to the ACLR endoprosthesis technique group  
154 (combined group, n=33) and the standard ACLR group (simple group, n=33), with no  
155 restrictions on either group. Randomization was performed by an investigator who was  
156 not involved in the study. Allocation results were sealed in opaque envelopes and  
157 maintained by the study coordinator. On the day of surgery, one envelope per patient  
158 was given to the surgeon by the study coordinator. The participants and physicians  
159 included in the study were informed of the grouping, but neither the rehabilitators who  
160 instructed the patients on rehabilitation nor the data collectors who conducted the  
161 follow-up visits were aware of the grouping.

### 162 **Interventions and surgical techniques**

163 In all patients, all-inside ACLR was performed using autologous semitendinosus  
164 tendons with arthroscopy. Semitendinosus tendons were braided with sutures (0  
165 FiberWire Suture, Arthrex) to form four strands of ACL grafts (all between 7.5-10 mm  
166 in diameter, supplemented with semimembranous tendons less than 7.5 mm in  
167 diameter). In the ACLR group, the braided graft femoral end and tibial segment were  
168 suspended and fixed with a TightRope (ACL TightRope RT Implant, Arthrex). On the  
169 other hand, in the ACLR with internal brace group, a separate wire tape (2 mm  
170 FiberTape, Arthrex) was added in addition to the components and technique used in the  
171 ACLR group. The suture was fixed with a knotless bone anchor (4.75-mm PEEK  
172 SwiveLock, Arthrex) distally and a TightRope suspension proximally as in the graft  
173 (Fig. 2).

174 The procedure was as follows: the patient was anesthetized, a tourniquet was applied  
175 to the affected limb, routine surgical disinfection of the knee was performed, a sterile  
176 surgical sheet was placed, the semitendinosus tendon was palpated, a straight incision  
177 was made medial to the tibial tuberosity, the semitendinosus tendon was removed with  
178 a tendon extractor, 10 ml of ropivacaine was injected at the tendon extraction site, and  
179 the removed semitendinosus tendon was braided into four strands using the GraftLink  
180 (Arthrex) technique.[26] A conventional knee arthroscopic approach was used on the  
181 anteromedial and anterolateral sides of the affected knee to explore the injured  
182 structures and remove the remaining portion of the ACL. The knee was flexed to the  
183 extreme, and the femoral tract was created at the footprint of the ACL stop at the lateral  
184 femoral condyle and the tibial tract at the footprint of the ACL start. The graft and two  
185 TightRope titanium plates were pulled into the knee cavity and removed through the  
186 femoral and tibial tracts, respectively. The tabs were flipped, the tab rings were  
187 tightened, and the titanium plates were fixed. In the ACLR with an internal brace group,  
188 the femoral end of the FiberTape wire band was fixed with a TightRope ring, the wire  
189 band was tensioned in the extended position, and the tibial end was fixed independently

190 with a knotless bone anchor (4.75-mm PEEK SwiveLock, Arthrex).

191 All patients underwent uniform training and rehabilitation program after surgery. The  
 192 entire rehabilitation process was divided into seven phases. The first three phases  
 193 focused on controlling swelling and restoring the range of motion, which usually  
 194 required four weeks. The detailed rehabilitation plan is presented in **Table 1**. Phases  
 195 4-5 focused on restoring quadriceps muscle strength control and balance along with  
 196 core strength restoration training. Phases 6-7 included gradual resumption of various  
 197 sports activities, from daily activities to professional activities or contact sports. A  
 198 detailed rehabilitation plan has been presented in **Tables 2** and **3**.

199

200

**Table 1. Phases 1-3 of the post-ACLR rehabilitation program**

| Phase                          | Movement Exercises                                                                                                                                                                                                                                                                                                                                                                                                                                                                                                                                                                                                                                                                                                                                                                                                                                                                                                                                                                                                                                                                                                                                                                                                                                                                                                                                                                                                                                 | Gait Exercises                                                                                                                                             | Manipulative Massage                                                                                                                                                                   | Rehabilitation Goals                                                                                                                                                                                                                                                          | Precautions                                                                                                                                                                                                                                                                                                          |
|--------------------------------|----------------------------------------------------------------------------------------------------------------------------------------------------------------------------------------------------------------------------------------------------------------------------------------------------------------------------------------------------------------------------------------------------------------------------------------------------------------------------------------------------------------------------------------------------------------------------------------------------------------------------------------------------------------------------------------------------------------------------------------------------------------------------------------------------------------------------------------------------------------------------------------------------------------------------------------------------------------------------------------------------------------------------------------------------------------------------------------------------------------------------------------------------------------------------------------------------------------------------------------------------------------------------------------------------------------------------------------------------------------------------------------------------------------------------------------------------|------------------------------------------------------------------------------------------------------------------------------------------------------------|----------------------------------------------------------------------------------------------------------------------------------------------------------------------------------------|-------------------------------------------------------------------------------------------------------------------------------------------------------------------------------------------------------------------------------------------------------------------------------|----------------------------------------------------------------------------------------------------------------------------------------------------------------------------------------------------------------------------------------------------------------------------------------------------------------------|
| <b>Phase 1 (within 1 week)</b> | (1) Placing the heel against the bed for flexion and extension sliding; supine position, the affected leg bends the hip, flexes the knee and places the heel on the wall for flexion and extension sliding; sitting position, legs on the floor; the healthy leg is placed in front of the affected leg and assists the affected leg in flexing the knee.<br>(2) Ankle pump exercises (the affected leg is elevated, and the foot performs upward hooking and downward stepping movements, along with rotational movements).<br>(3) Anterior thigh muscle tensing exercises with the knee in straight position (can be combined with neuromuscular electrical stimulation or biofeedback exercises).<br>(4) Hip muscle group training.<br>(5) Pillow clamping of the legs for medial thigh muscle group strength training.<br>(6) The brace is locked in 0° position, and the affected leg is lifted in the supine and prone positions for muscle strength training.<br>(7) Passive knee extension exercises: prone position with the affected knee extended out of bed for suspension or supine position with the affected leg in a slightly elevated heel position and the knee joint suspended.<br>(8) Weight transfer training (front-to-back and left-to-right) can be performed in the above mentioned weight-bearing exercise position.<br>(9) Continuous passive movement apparatus training with increased knee flexion by 5° to 10°/day. | (1) Flat and step gait training with the support of a knee protection brace and double crutches.<br>(2) Cold compresses after training to reduce edema.    | (1) Pushing the patella in all directions.<br>(2) Manipulation of the posterior thigh muscles of the affected limb or sitting and standing to pull the muscles to relieve their spasm. | Active mobility of the knee joint reaches 0°- 90°.           (1) The anterolateral thigh muscles can be tightened better.<br>(2) The affected limb can be fully weight-bearing with the help of braces and crutches.<br>(3) Edema control is good.<br>(4) Good wound healing. | (1) Brace locked in 0° position, crutches, and weight-bearing exercises within a tolerable range.<br>(2) Wearing the brace at night and locking it in 0° position while sleeping with the affected leg elevated.                                                                                                     |
| <b>Phase 2 (1-2 weeks)</b>     | (1) Fixed cycling exercises (from small to a full range of pedal rotation).<br>(2) Tightening and 90° muscle strength exercises for anterior thigh muscles in straight position.<br>(3) Standing balance training on the affected leg with a single leg wearing support.<br>(4) Balance training on a balance board with forward and backward weight transfer.<br>(5) Continuous passive activity equipment training.<br>(6) Starting small partial weight-bearing squat exercises (within 30° of knee flexion).<br>(7) Passive straightening exercises with the heel slightly elevated and the knee hanging in air.<br>(8) Straight leg raises training (all directions).<br>(9) Terminal angle knee extension training in the standing position using an elastic band.                                                                                                                                                                                                                                                                                                                                                                                                                                                                                                                                                                                                                                                                           | (1) The healthy leg stands outside the treadmill with weight, and the affected leg simulates walking on the treadmill.<br>(2) The affected leg crosses the | (1) Manipulation to push the patella treatment.<br>(2) Manipulation of the posterior thigh muscle group for relaxation and stretching exercises.                                       | Active mobility of the knee joint reaches 0°-120°.           (1) Straight leg elevation; anterior thigh muscles can be tightened with force.<br>(2) The patient can walk normally using crutches with a nonlocking brace.                                                     | (1) Weight-bearing exercises within tolerable limits.<br>(2) Transition from double to single crutch.<br>(3) When the strength of the anterior thigh muscle group is well exercised, the locking brace can be gradually dispensed (the anterior thigh muscle group can be unlocked to more than 30° only when it can |

|                            |                                                                                                                                                                                                                                                                                                                                                                                                                                                                                                                                                                                                                                                                                                                                                                                                                                                                         |                                                                                                      |                                                                                                                                                                  |                                                                                                                                                                                                                               |
|----------------------------|-------------------------------------------------------------------------------------------------------------------------------------------------------------------------------------------------------------------------------------------------------------------------------------------------------------------------------------------------------------------------------------------------------------------------------------------------------------------------------------------------------------------------------------------------------------------------------------------------------------------------------------------------------------------------------------------------------------------------------------------------------------------------------------------------------------------------------------------------------------------------|------------------------------------------------------------------------------------------------------|------------------------------------------------------------------------------------------------------------------------------------------------------------------|-------------------------------------------------------------------------------------------------------------------------------------------------------------------------------------------------------------------------------|
|                            |                                                                                                                                                                                                                                                                                                                                                                                                                                                                                                                                                                                                                                                                                                                                                                                                                                                                         | obstacle training and simulates walking.                                                             |                                                                                                                                                                  | contract forcefully to keep the straight leg elevated).                                                                                                                                                                       |
| <b>Phase 3 (2-4 weeks)</b> | (1) Fixed bicycle training gradually increases the resistance to improve exercise endurance.<br>(2) Tightening exercises for the anterior thigh muscle group in straight position and muscle strength exercises in the range of 60°-90° until the muscle strength of both legs is equal.<br>(3) 0°-60° squat training, gradually increasing the resistance strength (for patients with meniscal repair, squat to the target angle on the healthy leg before shifting the weight to the middle of the two legs).<br>(4) Stand with both legs on a balance board for balance training in multiple directions.<br>(5) Single-leg standing balance training on the affected leg (with eyes closed and open and on a support surface with different degrees of softness).<br>(6) Straight leg raise training in the standing position can increase resistance appropriately. | Exercise with a rope tied around the waist or on a treadmill for forward and backward gait training. | (1) Manipulation to push the patella treatment.<br>(2) Manipulation of the surgical scar.<br>(3) Manipulative passive knee flexion or extension angle exercises. | The knee joint moves to an active full angle, aligning with the healthy side leg.<br>(1) Normal gait can be achieved without any walking aid.<br>(2) Self-care in daily life (may have difficulty walking up and down steps). |
|                            |                                                                                                                                                                                                                                                                                                                                                                                                                                                                                                                                                                                                                                                                                                                                                                                                                                                                         |                                                                                                      |                                                                                                                                                                  | Fully weight bearing; normal gait can be achieved without a brace or walker at three weeks postoperatively.                                                                                                                   |

201  
202  
203

**Table 2: Phases 4-5 of the post-ACLR rehabilitation program**

| Phase                       | Movement Exercises                                                                                                                                                                                                                                                                                                                                                                                                                                                                                                                                                                                                                                                                                                                                                                                                                                                                                                                                                                                                                                                                                                                                                                       | Gait Exercises                                                         | Manipulative Massage                    | Rehabilitation Goals                                                                                                                                                                                                                                                                                                                                                                     | Precautions                                                                                                                                                                                                                     |
|-----------------------------|------------------------------------------------------------------------------------------------------------------------------------------------------------------------------------------------------------------------------------------------------------------------------------------------------------------------------------------------------------------------------------------------------------------------------------------------------------------------------------------------------------------------------------------------------------------------------------------------------------------------------------------------------------------------------------------------------------------------------------------------------------------------------------------------------------------------------------------------------------------------------------------------------------------------------------------------------------------------------------------------------------------------------------------------------------------------------------------------------------------------------------------------------------------------------------------|------------------------------------------------------------------------|-----------------------------------------|------------------------------------------------------------------------------------------------------------------------------------------------------------------------------------------------------------------------------------------------------------------------------------------------------------------------------------------------------------------------------------------|---------------------------------------------------------------------------------------------------------------------------------------------------------------------------------------------------------------------------------|
| <b>Phase 4 (4-8 weeks)</b>  | (1) Fixed cycling training: gradually increasing the resistance.<br>(2) Squat training: Transition from double leg to single leg (0°-60°), gradually increasing resistance.<br>(3) Lunge training (0°-60°).<br>(4) Step training: centripetal and centrifugal contraction of the anterior thigh muscles (knee does not exceed 60°).<br>(5) Tiptoe training: Transition from double leg to single leg.<br>(6) Swing exercise: Standing using the affected leg, and the healthy leg is strapped with an elastic band and swings, transitioning from front-to-back swing to lateral swing and then to rotation or random direction movement.<br>(7) Rotational stability training: static lunge stance, lateral pull pulley exercise.<br>(8) Exercise with a rope tied around the waist to provide resistance; walking exercises in forward and backward, left and right directions.<br>(9) Walking exercises on the treadmill in four directions.<br>(10) Balance board training: various support surfaces, double-legged standing.<br>(11) Single-leg stand for ball tossing exercises.<br>(12) Core training: supine or prone position for bridge exercise, standing to pull the pulley. | Go around the obstacles at normal walking speed on different surfaces. | Manual method to loosen surgical scars. | (1) Center of gravity in the middle, squatting bilaterally to 60° (no more than 60°).<br>(2) Knee in good condition (slight pain and effusion, no instability).<br>(3) The circumference at the upper edge of the patella is 10 cm, with a 1-2 cm difference between the legs.<br>(4) The affected limb can maintain balance for > 30 s while standing on one leg with little body sway. | (1) No participation in sports which have a high impact on the joints, such as running or jumping.<br>(2) No participation in sports with high lateral stress on the joints.<br>(3) Avoid squatting deeply (limited to 0°-60°). |
| <b>Phase 5 (8-12 weeks)</b> | (1) Squat training: transition from double to single leg (0°-60°), gradually increasing resistance.<br>(2) Lunge training (0°-60°).<br>(3) Tiptoe training: Transition from double-leg to single-leg.<br>(4) Increasing the strength of the posterior lateral muscle group with plyometric training.<br>Core muscle strength training.<br>① Combined strength and balance training (throwing and catching balls on the balance board, and small squats on the balance board)<br>② Advanced balance function training (affected leg standing on one leg, hand or opposite foot to touch objects on the ground or lateral pulling elastic band)<br>③ Swimming training, in addition to breaststroke.<br>Additionally, care should be taken not to stir the leg at                                                                                                                                                                                                                                                                                                                                                                                                                          | —                                                                      | —                                       | (1) The thigh circumference of both legs is approximately the same (within 1 cm of each other).<br>(2) The affected limb squats to 60° on one leg.<br>(3) The affected limb can stand on one leg to maintain balance for 60 s.<br>(4) Little, if any, edema with activity.                                                                                                               | Patellar tendonitis may occur.                                                                                                                                                                                                  |

a deep squatting angle or to use a splint when swimming.  
④ Cycling training every other day.

204

205

206

207 **Table 3: Phases 6-7 of the post-ACLR rehabilitation program**

208

| Phase                 | Movement Exercises                                                                                                                                                                                                                                                                                                                                     | Gait Exercises | Manipulative Massage | Rehabilitation Goals                                                                                                                                                                                                                                                                                                         | Precautions                                                                                                                                                                                                                                      |
|-----------------------|--------------------------------------------------------------------------------------------------------------------------------------------------------------------------------------------------------------------------------------------------------------------------------------------------------------------------------------------------------|----------------|----------------------|------------------------------------------------------------------------------------------------------------------------------------------------------------------------------------------------------------------------------------------------------------------------------------------------------------------------------|--------------------------------------------------------------------------------------------------------------------------------------------------------------------------------------------------------------------------------------------------|
| Phase 6 (12-16 weeks) | (1) Jogging movement: multiple directions for running.<br>(2) Increasing the speed of all sports.<br>(3) Skateboard training, slow walking in water and other forms of exercise can be carried out.                                                                                                                                                    | —              | —                    | (1) Squat down to 60° on one leg with the affected limb and repeat 20 times.<br>(2) The affected leg can stand on one leg to maintain balance for at least 60 s.<br>(3) Vertical or horizontal jump using both legs with a good landing position.<br>(4) Single-leg jump: 80% of the ability of the healthy leg is achieved. | Avoid wrong movements or posture.<br>(1) Landing with the knee joint too straight.<br>(2) The knee joint is turned outward or inward when landing.<br>(3) When landing or bouncing, the healthy leg always takes the lead, not the affected leg. |
| Phase 6 (12-16 weeks) | (1) Progressive running program.<br>(2) Testing and training of single-leg jumping.<br>(3) Vertical or horizontal jumps, transitioning from double to single leg.<br>(4) Progressive enhancement type training (box jumps, side jumps, standing jumps, deep squat jumps, etc.).<br>(5) Speed and agility training (join professional sports training). | —              | —                    | After 20 weeks, they participate in a professional sports program.                                                                                                                                                                                                                                                           | —                                                                                                                                                                                                                                                |

209

210 **Baseline indicators and observations**

211 Baseline and preoperative patient characteristics included sex, age, affected limb (left  
212 or right), cause of injury (playing basketball or other sports such as soccer), smoking  
213 status (yes or no), time from injury to surgery (fresh injury or old rupture), whether the  
214 injury was accompanied by cartilage and meniscal damage, time of surgery, and degree  
215 of ACL fracture (partial or total).

216

217 **Study endpoints**

218 **Primary outcome/endpoint:** IKDC score changes in knee function from preoperative  
219 period to 6 months postoperatively was the primary outcome. The IKDC is a commonly  
220 used tool to evaluate outcomes after knee surgery, including ACLR. [27] The IKDC  
221 knee score consists of knee assessment (10 entries) and knee ligament checklist (eight  
222 entries), covering joint pain, motor level, and daily activity ability, with total score  
223 ranging between 0-100. The IKDC can be used to assess knee symptoms, function, and  
224 physical activity. The IKDC assesses symptoms, function, and physical activity of the  
225 knee. Patients were evaluated using a questionnaire preoperatively and at follow-up  
226 visits at 1, 3, 6, 12, and 24 months postoperatively.

227 **Secondary outcomes/endpoints:** Lysholm knee score (LKS), Knee Injury and  
228 Osteoarthritis Outcome Score (KOOS, including knee symptoms, pain, activities of  
229 daily living, sports and recreational activities, and quality of life), Visual Analog Scale  
230 (VAS, for pain assessment), Lachman test, MRI data, and assessment of knee stability  
231 using the Kneelax3 knee stability meter.

232 (1) *Kneelax3 (MONITORED REHAB SYSTEMS B.V. Model: KNEELAX3, The*  
233 *Netherlands):* The Kneelax3 arthrometer was used for assessment of knee stability  
234 preoperatively and 1, 3, 6, 12, and 24 months postoperatively.

235 (2) *LKS:* This scoring system consists of eight questions scored on a scale of 0-100,  
236 with higher scores representing better functional status of the patient. The main  
237 tendency is toward activities of daily living, and patients were assessed using  
238 questionnaires before surgery and at 1, 3, 6, 12, and 24 months of postoperative follow-  
239 up visits.[28]

240 (3) *KOOS score:* The KOOS consists of five subscales: pain, other knee symptoms,  
241 activities of daily living, function in sports and recreation (Sport/Rec), and knee-related  
242 quality of life.[29] Patients were given one week for consideration before answering  
243 the questions, and each question had five alternative boxes with scores ranging between  
244 0-4. Standard scores were calculated for each subscale (100 for no symptoms and 0 for  
245 extreme symptoms), and patients were assessed using questionnaires before surgery  
246 and at follow-up visits at 1, 3, 6, 12, and 24 months after surgery.

247 (4) *VAS score:* The visual analogue pain scoring method is more sensitive and  
248 comparable. In this trial, a 100-mm VAS pain score (including resting-state score, 30-  
249 min post-walk score, and overall pain level in the past month) was used.[30] This  
250 protocol only assessed pain at rest, with 0 representing no pain and 100 representing  
251 the most severe pain. Patients were evaluated using questionnaires before surgery and  
252 at 1, 3, 6, 12, and 24 months of postoperative follow-up.

253 (5) *Lachman test:* This assesses ACL function with the patient in supine or prone  
254 position and knee flexed at an angle of approximately 30°.[31] The examiner uses one  
255 hand to immobilize the thigh while the other hand attempts to move the tibia forward.  
256 Positive results suggest that patients with ACL injuries be tested preoperatively and at  
257 follow-up visits at 1, 3, 6, 12, and 24 months postoperatively.

258 (6) *MRI assessment:* MRI was performed at 12 and 24 months postoperatively to assess  
259 the patient's reconstructed ACL.

260

## 261 **Patient termination and withdrawal criteria**

262 Patients could withdraw from the trial at any time due to the following reasons:

263 (1) **Surgical failure:** 1) occurrence of infection; 2) no secondary rupture of the  
264 reconstructed ligament (rupture of the ligament or the internal brace augmentation line  
265 or both in the trial group, rupture of the reconstructed ligament in the control group);  
266 and 3) knee instability: self-reported knee instability, or Lachman test (+) or Kneelax3  
267 knee arthrometer test revealing a 3-mm difference in comparison with the healthy side.

268 (2) **Patient withdrawal from the trial:** All participants had the right to withdraw at any  
269 time during the study period. A participant was withdrawn from the trial if any of the



1  
2  
3 270 following occurred during the trial: 1) withdrawal of informed consent by the  
4 271 participant; 2) a person who, in the opinion of the investigator, was no longer suitable  
5 272 for continuation of the clinical trial; 3) a woman who became pregnant during the  
6 273 clinical trial; 4) death of the participant; or 5) the participant was lost to follow-up.

8  
9 274 **(3) Trial termination:**

10 275 1) The clinical trial institution and investigator found that the risks to patients by  
11 276 continuing the clinical trial exceeded the possible benefits; 2) the ethics committee  
12 277 found that the rights of the participants could not be protected; 3) the sponsor requested  
13 278 termination of the trial for various reasons; and 4) the national administrative authority  
14 279 requested termination.

15  
16  
17 280 The timing and reasons for withdrawal from the trial were recorded in detail in the case  
18 281 report form. Follow-up care was no longer provided for participants who voluntarily  
19 282 withdrew from the treatment, as well as for those for whom follow-up data were not  
20 283 being collected. However, participants who withdrew from the trial due to adverse  
21 284 events or because of surgical failure were to be followed up until the adverse events  
22 285 stabilized or resolved or until the investigator deemed that further follow-up was no  
23 286 longer necessary.

24  
25 287

26  
27 288 **Data management**

28  
29 289 The trial used an electronic data collection (EDC) system for data management. The  
30 290 investigator or investigator-authorized research staff completed the electronic Case  
31 291 Report Form (eCRF) through the EDC system in an accurate, timely, complete, and  
32 292 standardized manner, based on the original information from the participants.  
33 293 Questionnaire checking, data cleaning, and summarization were performed promptly  
34 294 after each follow-up visit. A follow-up survey is proposed to adopt the electronic  
35 295 questionnaire system and on-site questionnaire survey. The on-site survey results will  
36 296 be saved in time and organized in the database later. The investigator or investigator's  
37 297 authorized researcher will enter the data into the EDC according to their respective  
38 298 accounts. The data administrator verifies the reliability, completeness, and accuracy of  
39 299 the data in the EDC. If any questionable data are found, a challenge can be issued in  
40 300 the system, and the investigator or the investigator's delegated researcher will verify,  
41 301 correct, or answer the query. When all the data have been entered into the database and  
42 302 all queries have been resolved, the database will be locked by the data administrator. If  
43 303 a problem is found after the database is locked and there is a need to correct it, the  
44 304 process of unlocking and relocking the data will be followed. After the database is  
45 305 locked, the data manager will submit the data to the analyst for statistical analysis as  
46 306 scheduled.

47  
48  
49  
50 307

51  
52 308 **Statistical analysis**

53  
54 309 **(1) Statistical design:** This was a randomized controlled clinical trial.

55  
56 310 **(2) Principles of Statistical Analysis:** All statistical analyses were performed using  
57 311 SAS version 9.4 or later, R version 3.3.2 or later, or SPSS24(IBM Corporate  
58 312 Headquarters, Armonk, New York, USA). All statistical tests were two-sided tests, and  
59 313 P values  $\leq 0.05$  were considered statistically significant for the differences tested

1  
2  
3 314 (unless otherwise specified).  
4

5 315 i) Summary statistics for continuous variables: including the mean, standard deviation,  
6 316 median, minimum, maximum, lower quartile (Q1), and upper quartile (Q3); summary  
7 317 statistics for categorical variables, including the number of cases and percentages of  
8 318 each category.

9  
10 319 ii) Between-group comparisons of demographic baseline characteristics: Group  
11 320 comparisons for continuous variables will be made using independent samples t-test  
12 321 (chi-square, normal distribution) or Wilcoxon rank-sum test depending on data  
13 322 distribution, and chi-square test or exact probability method for categorical variables  
14 323 (if chi-square test is not applicable).

15  
16 324 **(3) Completion and demographic analyses:** Baseline analyses were based on full  
17 325 analysis set (FAS). The enrollment and completion status of the trials were summarized  
18 326 and the reasons for non-completion are described in a detailed table. The participants'  
19 327 demographic characteristics were described and compared to measure comparability  
20 328 between the two groups. Validity reporting data were accepted only if the baseline was  
21 329 balanced between the groups; otherwise, the validity data were corrected before  
22 330 reporting.

23  
24 331 **(4) Patient-reported outcome validity evaluation indices:** Outcome validity evaluation  
25 332 will be based on the FAS and the per-protocol set (PPS). The statistical description and  
26 333 inference of the data will be based on the characteristics of the data, the selection of  
27 334 applicable descriptive indicators, and hypothesis testing methods.

28  
29 335 *Primary patient-reported outcome:* Comparison of IKDC knee scores at six-months  
30 336 ( $\pm 2$  weeks) postoperatively in the trial and control groups. We will use a linear  
31 337 regression model for analysis to correct for possible confounding factors such as age,  
32 338 sex, and cause of injury. Preoperative baseline IKDC scores will be used as predictors  
33 339 when conducting the analysis, and IKDC scores at 6 months ( $\pm 2$  weeks) will be used as  
34 340 indicators of post-treatment outcomes.

35  
36 341 *Secondary patient-reported outcomes*

37  
38 342 i) Since IKDC scores were measured multiple times during the follow-up period, we  
39 343 will use a linear mixed model to compare the changes over time between the trial and  
40 344 control groups.

41  
42 345 ii) The anterior tibial translation distance is measured using the Kneelax3 knee stability  
43 346 meter, and comparisons of the anterior tibial translation distance between the test and  
44 347 control groups at the same postoperative time points with the same force will be  
45 348 performed using either an independent samples t-test (chi-square, normally distributed)  
46 349 or a Wilcoxon rank sum test. A linear mixed model will also be used to compare and  
47 350 analyze the evolution of these consecutive results over time in both groups.

48  
49 351 iii) A comparative analysis of failure and infection rates in the control group versus the  
50 352 test group during the main six months will be performed using the chi-square test or t-  
51 353 test.

52  
53 354 iv) Linear regression of continuous outcomes from baseline to 24 months, such as LKS,  
54 355 KOOS score (including knee symptoms, pain, activities of daily living, sports and  
55 356 recreational activities, quality of life), Lachman test, and pain VAS protocols, will be  
56 357 used to compare and analyze the evolution of these continuous outcomes over time in



1  
2  
3 358 the two groups using linear mixed models.  
4

5 359 v) The morphology and signal intensity of the postoperative ACL will be assessed using  
6 360 MRI, and different treatments will be compared at different time points using chi-square  
7 361 test.  
8

9 362

### 10 363 **Analysis of safety indicators**

11  
12 364 Safety evaluation will be based on a safety-set (SS) analysis dataset. The internationally  
13 365 accepted Medical Dictionary for Regulatory Activities (MedDRA) term set  
14 366 classification was used for adverse event coding. The types of adverse events,  
15 367 frequency, severity, and relationship with internal brace enhancement line generation  
16 368 and surgery were summarized by group. A detailed list of the various adverse events is  
17 369 provided, with special notations for participants who discontinued the trial because of  
18 370 adverse events and for those who experienced serious adverse events. The proportions  
19 371 of patients who developed complications between treatments were compared using the  
20 372 chi-square test.  
21  
22  
23

24 373

### 25 374 **Patient and public involvement**

26  
27 375 Patients and/or the public were not involved in the study design, conduct, reporting, or  
28 376 dissemination plans.  
29

30 377

## 31 378 **Discussion**

32  
33 379 This prospective, randomized controlled trial aimed to investigate the clinical efficacy  
34 380 of ACLR with and without the internal brace technique. In this 2-year follow-up study,  
35 381 the subjective, objective, and functional outcomes of patients who underwent ACLR  
36 382 with the internal brace technique or ACLR alone were compared. This study  
37 383 hypothesized that ACLR with internal brace technique would be more stable than  
38 384 ACLR alone in the early postoperative period, with a lower incidence of secondary  
39 385 injury, reduced duration and extent of pain, and earlier return to preinjury activity levels.  
40 386 However, there may be no significant difference between the two groups in terms of  
41 387 patient-reported outcome indicators with increase in recovery time.  
42  
43  
44

45 388 ACL rupture is a common knee injury among athletes and has been extensively studied.  
46 389 Studies from as early as the late 20th century have shown that ACLR is superior to ACL  
47 390 repair.[32, 33] The ACL is an important structure for maintaining knee stability,  
48 391 preventing anterior tibial displacement, and limiting intratibial rotation,[34] making  
49 392 ACLR the gold standard treatment for patients recovering motion or performing  
50 393 rotational activities after ACL rupture in the knee.[35] The recovery of knee function  
51 394 after surgery depends on the ability of the ACL graft to withstand appropriate loads  
52 395 during rehabilitation and after returning to sports. Tendon grafts implanted in the human  
53 396 knee joint survive in the intra-articular environment and gradually in the ligaments. The  
54 397 graft is fragile and vulnerable to reinjury during the pre-remodeling phase before  
55 398 ligamentization,[36] so a carefully designed rehabilitation program should be  
56 399 developed to prevent reinjury during the rehabilitation period. Several studies have  
57 400 found a higher probability of re-rupture or secondary revision in athletes and  
58  
59  
60

1  
2  
3 401 adolescents or for ACLR using either autologous or allogeneic tendons.[10, 37]  
4 402 Therefore, a surgical approach that increases the structural strength of the graft and  
5 403 protects it during the early stages of graft ligamentization is important.

7 404 The biomechanical properties of the intraarticular reconstructed ligaments reportedly  
8 405 improved 8 weeks postoperatively when the FiberTape suture was applied in a rabbit  
9 406 model. Additionally, during this period, FiberTape did not adversely affect bone tunnel  
10 407 healing or cause a long-term increase in indicators of inflammation.[12] In a dog model,  
11 408 no severe inflammation, immune response, bone erosion, or premature osteoarthritis  
12 409 development was observed 6 months postoperatively.[38] The results of these studies  
13 410 support the biocompatibility and safety of intraarticular suture tape for ACLR  
14 411 enhancement.

17 412 A study on load sharing after ACL graft enhancement using suture tape reported that  
18 413 load sharing began at 200 N and 300 N for 7-mm and 9-mm grafts, respectively. The  
19 414 final peak load (400 N) was shared by 31% (7-mm graft) and 20% (9-mm graft) when  
20 415 using suture tape.[39] Suture tape ligament augmentation may protect biological grafts  
21 416 from excessive peak loading and elongation. After ACLR in the early recovery phase,  
22 417 suture band augmentation reportedly increases ACL graft stiffness by 104% and the  
23 418 ultimate breaking load by 57%, reducing the graft failure rate in clinical situations.

26 419 A recent systematic review by Christopher et al. concluded from biomechanical, animal,  
27 420 and clinical studies that suture tape augmentation in ACLR increased biomechanical  
28 421 stability.[40] Therefore, in this randomized controlled trial, we will conduct a  
29 422 prospective observational comparison and long-term follow-up to elucidate the clinical  
30 423 efficacy of internal bracing in ACLR.

32 424

## 34 425 **Ethics and dissemination**

36 426 The trial was approved by the Medical Ethics Committee of Xiangya Hospital of  
37 427 Central South University on October 26, 2021 (ethics number "202110478") and  
38 428 prospectively registered in the China Clinical Trials Registry on March 14, 2022  
39 429 (registration number: ChiCTR2200057526). All participants signed an informed  
40 430 consent form before participating in this trial, and we will protect the patients from any  
41 431 invasion of their privacy. All investigators will keep the study results confidential until  
42 432 after the data are made public and will release no data related to the database without  
43 433 approval from the principal investigator. We will publish our findings and data in peer-  
44 434 reviewed journals and present them at national and international conferences.

## 47 435 **Abbreviations**

49 436 Anterior cruciate ligament (ACL)

51 437 Anterior cruciate ligament reconstruction (ACLR)

53 438 International Knee Documentation Committee (IKDC)

54 439 the Knee Injury and Osteoarthritis Outcome Score (KOOS)

56 440 Lysholm knee score (LKS)

58 441 Visual Analog Scale (VAS)

1  
2  
3 442 ultrahigh molecular weight polyethene (UHMWPE)  
4  
5 443 Standard Protocol Items: Recommendations for Interventional Trials (SPIRIT)  
6  
7 444 activities of daily living (ADL)  
8  
9 445 sport and recreation (Sport/Rec)  
10  
11 446 quality of life (QOL)  
12  
13 447 medial collateral ligament (MCL)  
14  
15 448 minimum clinically important difference (MCID)  
16  
17 449 electronic Case Report Form (eCRF)  
18  
19 450 safety set (SS)  
20  
21 451 Medical Dictionary for Regulatory Activities (MedDRA)

## 452 **Author information**

23 453 Wen-hao Lu, Email: [lw hao0717@csu.edu.cn](mailto:lw hao0717@csu.edu.cn)  
24  
25 454 Di Liu, Email: [liudi9704@csu.edu.cn](mailto:liudi9704@csu.edu.cn)  
26  
27 455 Zi-jun Cai, Email: [caizijun@csu.edu.cn](mailto:caizijun@csu.edu.cn)  
28  
29 456 Lin-yuan Pan, Email: [Panlinyuan@csu.edu.cn](mailto:Panlinyuan@csu.edu.cn)  
30  
31 457 Wen-qing Xie, Email: [xiewenqing@csu.edu.cn](mailto:xiewenqing@csu.edu.cn)  
32  
33 458 Hong-Fu Jin, Email: [218112327@csu.edu.cn](mailto:218112327@csu.edu.cn).  
34  
35 459 Xu Liu, Email: [liuxu990702@163.com](mailto:liuxu990702@163.com)  
36  
37 460 Yu-sheng Li, Email: [liyusheng@csu.edu.cn](mailto:liyusheng@csu.edu.cn).  
38  
39 461 Wen-feng Xiao, Email: [xiaowenfneng@csu.edu.cn](mailto:xiaowenfneng@csu.edu.cn).

## 462 **Author Affiliations**

41 463 <sup>1</sup> Department of Orthopaedics, Xiangya Hospital, Central South University, Changsha  
42 464 410008, Hunan, China.

43 465 <sup>2</sup> National Clinical Research Center for Geriatric Disorders, Xiangya Hospital, Central  
44 466 South University, Changsha 410008, Hunan, China.

## 467 **Acknowledgements**

48 468 We would like to extend our gratitude to all the medical and nursing staff of the  
49 469 Department of Bone and Joint Surgery of Xiangya Hospital of Central South University  
50 470 for their unfailing care and great help to our patients. We also thank the patients for  
51 471 their support and trust in us. We also thank Djandan Tadum Arthur Vithran, who  
52 472 contributed greatly to revising and improving the language of the manuscript.

## 473 **Author contributions**

53 474 WF-X and YS-L established the study design; WH-L conceived the design and wrote  
54 475 the draft manuscript; D-L, ZJ-C, and LY-P were involved in data acquisition, analysis,

1  
2  
3 476 and interpretation; and WQ-X, HF-J, and X-L designed the rehabilitation protocol. All  
4 477 the authors have read and approved the final version of the manuscript.

## 478 **Funding**

479 This work was supported by National Clinical Research Center for Geriatric Disorders  
480 (Xiangya Hospital, Grant No.2021KFJJ02 and 2021LNJJ05), National Clinical  
481 Research Center for Orthopedics, Sports Medicine and Rehabilitation (2021-NCRC-  
482 CXJJ-PY-40), and National Natural Science Foundation of Hunan Province  
483 (2021JJ31105, 2023JJ30949).

## 484 **Competing interests**

485 The authors declare that they have no competing interests.

## 486 **References**

- 487 1. Robson AW. VI. Ruptured Crucial Ligaments and their Repair by Operation  
488 *Ann Surg.* 1903;37(5):716-718.
- 489 2. Patterson BE, Culvenor AG, Barton CJ, et al. Worsening Knee Osteoarthritis  
490 Features on Magnetic Resonance Imaging 1 to 5 Years After Anterior Cruciate  
491 Ligament Reconstruction. *Am J Sports Med.* 2018;46(12):2873-2883.
- 492 3. Suter LG, Smith SR, Katz JN, et al. Projecting Lifetime Risk of Symptomatic Knee  
493 Osteoarthritis and Total Knee Replacement in Individuals Sustaining a Complete  
494 Anterior Cruciate Ligament Tear in Early Adulthood. *Arthritis Care Res (Hoboken).*  
495 2017;69(2):201-208.
- 496 4. Filbay SR, Culvenor AG, Ackerman IN, Russell TG, Crossley KM. Quality of life  
497 in anterior cruciate ligament-deficient individuals: a systematic review and meta-  
498 analysis. *Br J Sports Med.* 2015;49(16):1033-1041.
- 499 5. Moses B, Orchard J, Orchard J. Systematic review: Annual incidence of ACL  
500 injury and surgery in various populations. *Res Sports Med.* 2012;20(3-4):157-179.
- 501 6. Griffin LY, Albohm MJ, Arendt EA, et al. Understanding and preventing  
502 noncontact anterior cruciate ligament injuries: a review of the Hunt Valley II meeting,  
503 January 2005. *Am J Sports Med.* 2006;34(9):1512-1532.
- 504 7. de Sa D, Shanmugaraj A, Weidman M, et al. All-Inside Anterior Cruciate Ligament  
505 Reconstruction-A Systematic Review of Techniques, Outcomes, and Complications.  
506 *The journal of knee surgery.* 2018;31(9):895-904.
- 507 8. Di Benedetto P, Di Benedetto E, Fiocchi A, Beltrame A, Causero A. Causes of  
508 Failure of Anterior Cruciate Ligament Reconstruction and Revision Surgical Strategies.  
509 *Knee Surg Relat Res.* 2016;28(4):319-324.
- 510 9. Vaishya R, Agarwal AK, Ingole S, Vijay V. Current Trends in Anterior Cruciate  
511 Ligament Reconstruction: A Review. *Cureus.* 2015;7(11):e378.
- 512 10. Takazawa Y, Ikeda H, Saita Y, et al. Return to Play of Rugby Players After  
513 Anterior Cruciate Ligament Reconstruction Using Hamstring Autograft: Return to  
514 Sports and Graft Failure According to Age. *Arthroscopy.* 2017;33(1):181-189.
- 515 11. Ellis HB, Matheny LM, Briggs KK, Pennock AT, Steadman JR. Outcomes and  
516 revision rate after bone-patellar tendon-bone allograft versus autograft anterior cruciate

1  
2  
3  
4  
5  
6  
7  
8  
9  
10  
11  
12  
13  
14  
15  
16  
17  
18  
19  
20  
21  
22  
23  
24  
25  
26  
27  
28  
29  
30  
31  
32  
33  
34  
35  
36  
37  
38  
39  
40  
41  
42  
43  
44  
45  
46  
47  
48  
49  
50  
51  
52  
53  
54  
55  
56  
57  
58  
59  
60

- 517 ligament reconstruction in patients aged 18 years or younger with closed physes.  
518 Arthroscopy. 2012;28(12):1819-1825.
- 519 12. Soreide E, Denbeigh JM, Lewallen EA, et al. In vivo assessment of high-  
520 molecular-weight polyethylene core suture tape for intra-articular ligament  
521 reconstruction: an animal study. Bone Joint J. 2019;101-b(10):1238-1247.
- 522 13. Lubowitz JH, MacKay G, Gilmer B. Knee medial collateral ligament and  
523 posteromedial corner anatomic repair with internal bracing. Arthrosc Tech.  
524 2014;3(4):e505-508.
- 525 14. Gilmer BB, Crall T, DeLong J, et al. Biomechanical Analysis of Internal Bracing  
526 for Treatment of Medial Knee Injuries. Orthopedics. 2016;39(3):e532-537.
- 527 15. Heusdens CHW, Hopper GP, Dossche L, Roelant E, Mackay GM. Anterior  
528 cruciate ligament repair with Independent Suture Tape Reinforcement: a case series  
529 with 2-year follow-up. Knee Surg Sports Traumatol Arthrosc. 2019;27(1):60-67.
- 530 16. Nishimura A, Nakazora S, Senga Y, et al. Arthroscopic Internal Brace  
531 Augmentation With Arthroscopic Modified Broström Operation for Chronic Ankle  
532 Instability. Arthrosc Tech. 2021;10(4):e995-e1000.
- 533 17. Wilk KE, Arrigo CA, Bagwell MS, Rothermich MA, Dugas JR. Repair of the Ulnar  
534 Collateral Ligament of the Elbow: Rehabilitation Following Internal Brace Surgery. J  
535 Orthop Sports Phys Ther. 2019;49(4):253-261.
- 536 18. van Eck CF, Limpisvasti O, ElAttrache NS. Is There a Role for Internal Bracing  
537 and Repair of the Anterior Cruciate Ligament? A Systematic Literature Review. Am J  
538 Sports Med. 2018;46(9):2291-2298.
- 539 19. Cook JL, Smith P, Stannard JP, et al. A Canine Arthroscopic Anterior Cruciate  
540 Ligament Reconstruction Model for Study of Synthetic Augmentation of Tendon  
541 Allografts. J Knee Surg. 2017;30(7):704-711.
- 542 20. Bachmaier S, Smith PA, Bley J, Wijdicks CA. Independent Suture Tape  
543 Reinforcement of Small and Standard Diameter Grafts for Anterior Cruciate Ligament  
544 Reconstruction: A Biomechanical Full Construct Model. Arthroscopy. 2018;34(2):490-  
545 499.
- 546 21. Bedi A. Editorial Commentary: Buckle Up Surgeons: "Safety Belt" Reinforcement  
547 of Knee Anterior Cruciate Ligament Reconstruction Grafts. Arthroscopy.  
548 2018;34(2):500-501.
- 549 22. Moher D, Hopewell S, Schulz KF, et al. CONSORT 2010 explanation and  
550 elaboration: updated guidelines for reporting parallel group randomised trials.  
551 International journal of surgery (London, England). 2012;10(1):28-55.
- 552 23. Collins NJ, Misra D, Felson DT, Crossley KM, Roos EM. Measures of knee  
553 function: International Knee Documentation Committee (IKDC) Subjective Knee  
554 Evaluation Form, Knee Injury and Osteoarthritis Outcome Score (KOOS), Knee Injury  
555 and Osteoarthritis Outcome Score Physical Function Short Form (KOOS-PS), Knee  
556 Outcome Survey Activities of Daily Living Scale (KOS-ADL), Lysholm Knee Scoring  
557 Scale, Oxford Knee Score (OKS), Western Ontario and McMaster Universities  
558 Osteoarthritis Index (WOMAC), Activity Rating Scale (ARS), and Tegner Activity  
559 Score (TAS). Arthritis Care Res (Hoboken). 2011;63 Suppl 11(0 11):S208-228.
- 560 24. Irrgang JJ, Anderson AF, Boland AL, et al. Responsiveness of the International



- 1  
2  
3 561 Knee Documentation Committee Subjective Knee Form. *Am J Sports Med.*  
4 562 2006;34(10):1567-1573.
- 5 563 25. Li YL, Ning GZ, Wu Q, et al. Single-bundle or double-bundle for anterior cruciate  
6 564 ligament reconstruction: a meta-analysis. *Knee.* 2014;21(1):28-37.
- 7 565 26. Lubowitz JH. All-inside anterior cruciate ligament graft link: graft preparation  
8 566 technique. *Arthrosc Tech.* 2012;1(2):e165-168.
- 9 567 27. Greco NJ, Anderson AF, Mann BJ, et al. Responsiveness of the International Knee  
10 568 Documentation Committee Subjective Knee Form in comparison to the Western  
11 569 Ontario and McMaster Universities Osteoarthritis Index, modified Cincinnati Knee  
12 570 Rating System, and Short Form 36 in patients with focal articular cartilage defects. *Am*  
13 571 *J Sports Med.* 2010;38(5):891-902.
- 14 572 28. Briggs KK, Lysholm J, Tegner Y, et al. The reliability, validity, and responsiveness  
15 573 of the Lysholm score and Tegner activity scale for anterior cruciate ligament injuries  
16 574 of the knee: 25 years later. *Am J Sports Med.* 2009;37(5):890-897.
- 17 575 29. Collins NJ, Prinsen CA, Christensen R, et al. Knee Injury and Osteoarthritis  
18 576 Outcome Score (KOOS): systematic review and meta-analysis of measurement  
19 577 properties. *Osteoarthritis Cartilage.* 2016;24(8):1317-1329.
- 20 578 30. Wewers ME, Lowe NK. A critical review of visual analogue scales in the  
21 579 measurement of clinical phenomena. *Res Nurs Health.* 1990;13(4):227-236.
- 22 580 31. Coffey R, Bordoni B. Lachman Test. *StatPearls.* Treasure Island (FL): StatPearls  
23 581 Publishing  
24 582 Copyright © 2022, StatPearls Publishing LLC.; 2022.
- 25 583 32. Engebretsen L, Benum P, Fasting O, Mølster A, Strand T. A prospective,  
26 584 randomized study of three surgical techniques for treatment of acute ruptures of the  
27 585 anterior cruciate ligament. *Am J Sports Med.* 1990;18(6):585-590.
- 28 586 33. Grøntvedt T, Engebretsen L, Benum P, et al. A prospective, randomized study of  
29 587 three operations for acute rupture of the anterior cruciate ligament. Five-year follow-up  
30 588 of one hundred and thirty-one patients. *J Bone Joint Surg Am.* 1996;78(2):159-168.
- 31 589 34. Noyes FR. The function of the human anterior cruciate ligament and analysis of  
32 590 single- and double-bundle graft reconstructions. *Sports Health.* 2009;1(1):66-75.
- 33 591 35. Ardern CL, Webster KE, Taylor NF, Feller JA. Return to sport following anterior  
34 592 cruciate ligament reconstruction surgery: a systematic review and meta-analysis of the  
35 593 state of play. *Br J Sports Med.* 2011;45(7):596-606.
- 36 594 36. Claes S, Verdonk P, Forsyth R, Bellemans J. The "ligamentization" process in  
37 595 anterior cruciate ligament reconstruction: what happens to the human graft? A  
38 596 systematic review of the literature. *Am J Sports Med.* 2011;39(11):2476-2483.
- 39 597 37. Wright RW, Gill CS, Chen L, et al. Outcome of revision anterior cruciate ligament  
40 598 reconstruction: a systematic review. *J Bone Joint Surg Am.* 2012;94(6):531-536.
- 41 599 38. Smith PA, Bozynski CC, Kuroki K, et al. Intra-Articular Biocompatibility of  
42 600 Multistranded, Long-Chain Polyethylene Suture Tape in a Canine ACL Model. *J Knee*  
43 601 *Surg.* 2019;32(6):525-531.
- 44 602 39. Bachmaier S, Smith PA, Argintar EH, et al. Independent Suture Augmentation  
45 603 With All-Inside Anterior Cruciate Ligament Reconstruction Reduces Peak Loads on  
46 604 Soft-Tissue Graft. A Biomechanical Full-Construct Study. *Arthroscopy.*



1  
2  
3  
4  
5  
6  
7  
8  
9  
10  
11  
12  
13  
14  
15  
16  
17  
18  
19  
20  
21  
22  
23  
24  
25  
26  
27  
28  
29  
30  
31  
32  
33  
34  
35  
36  
37  
38  
39  
40  
41  
42  
43  
44  
45  
46  
47  
48  
49  
50  
51  
52  
53  
54  
55  
56  
57  
58  
59  
60

605 2022;38(1):88-98.

606 40. C EAM, Huntington LS, Tulloch S. Suture Tape Augmentation of Anterior  
607 Cruciate Ligament Reconstruction increases biomechanical stability: A Scoping  
608 Review of Biomechanical, Animal, and Clinical Studies. *Arthroscopy*. 2022.

## 609 **Figure legends**

610 **Fig.1** Study Flow Diagram.

611 **Fig.2** A and B are the models of control and test groups, respectively. C and D are the  
612 pictures of control and test groups after intraoperative arthroscopic ACLR, respectively.

For peer review only

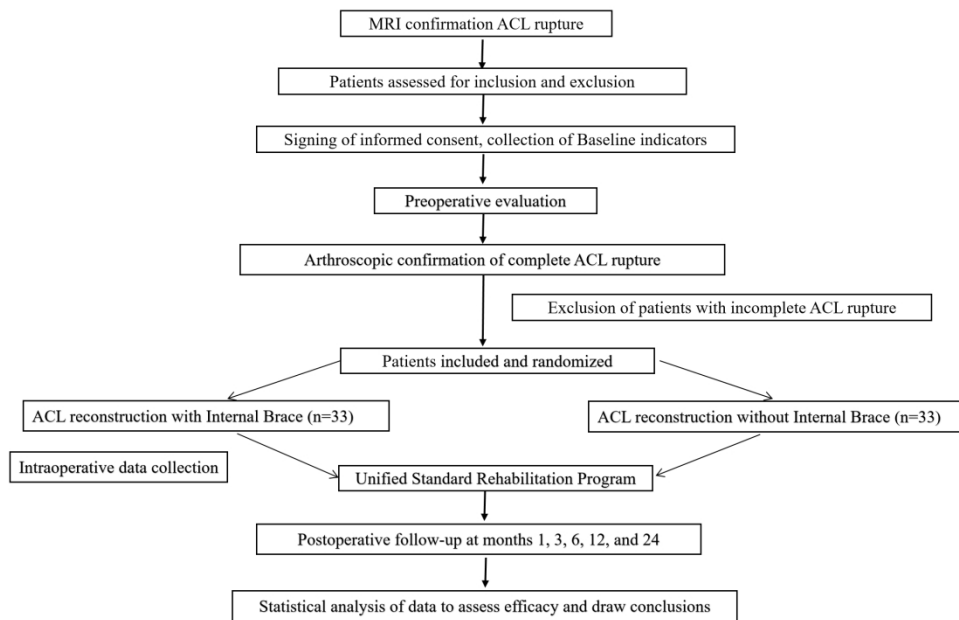

Study Flow Diagram.

731x467mm (76 x 76 DPI)

1  
2  
3  
4  
5  
6  
7  
8  
9  
10  
11  
12  
13  
14  
15  
16  
17  
18  
19  
20  
21  
22  
23  
24  
25  
26  
27  
28  
29  
30  
31  
32  
33  
34  
35  
36  
37  
38  
39  
40  
41  
42  
43  
44  
45  
46  
47  
48  
49  
50  
51  
52  
53  
54  
55  
56  
57  
58  
59  
60

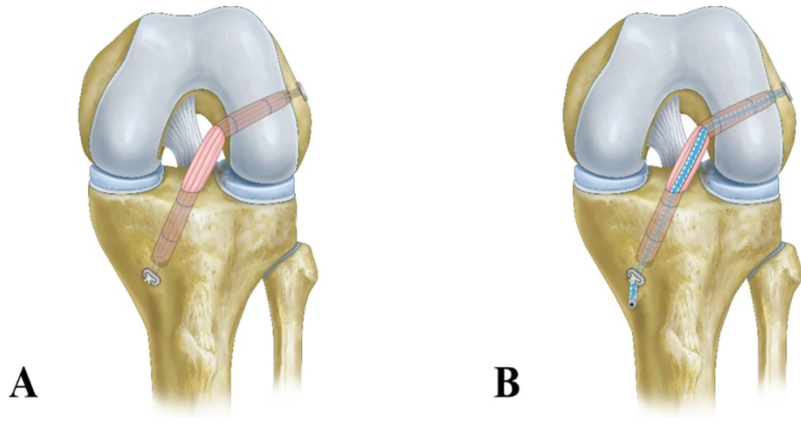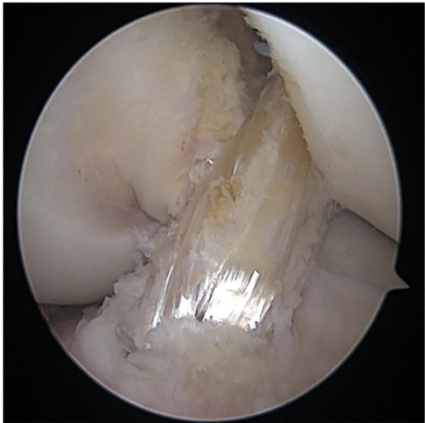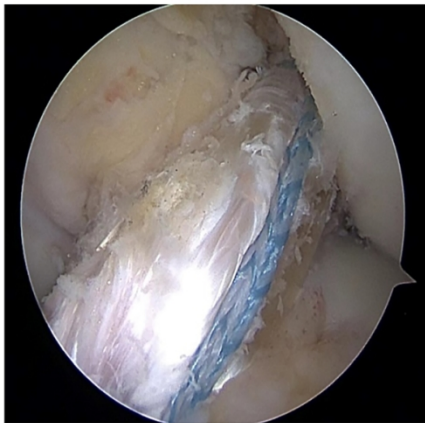

A and B are the models of control and test groups, respectively. C and D are the pictures of control and test groups after intraoperative arthroscopic ACLR, respectively.

253x253mm (138 x 138 DPI)

# Reporting checklist for protocol of a clinical trial.

Based on the SPIRIT guidelines.

## Instructions to authors

Complete this checklist by entering the page numbers from your manuscript where readers will find each of the items listed below.

Your article may not currently address all the items on the checklist. Please modify your text to include the missing information. If you are certain that an item does not apply, please write "n/a" and provide a short explanation.

Upload your completed checklist as an extra file when you submit to a journal.

In your methods section, say that you used the SPIRIT reporting guidelines, and cite them as:

Chan A-W, Tetzlaff JM, Gøtzsche PC, Altman DG, Mann H, Berlin J, Dickersin K, Hróbjartsson A, Schulz KF, Parulekar WR, Krleža-Jerić K, Laupacis A, Moher D. SPIRIT 2013 Explanation and Elaboration: Guidance for protocols of clinical trials. *BMJ*. 2013;346:e7586

|                                   |                     |                                                                                                              | Page<br>Number |
|-----------------------------------|---------------------|--------------------------------------------------------------------------------------------------------------|----------------|
| <b>Administrative information</b> |                     |                                                                                                              |                |
| Title                             | <a href="#">#1</a>  | Descriptive title identifying the study design, population, interventions, and, if applicable, trial acronym | 1              |
| Trial registration                | <a href="#">#2a</a> | Trial identifier and registry name. If not yet registered,                                                   | 2              |

|    |                     |                                                                                 |    |
|----|---------------------|---------------------------------------------------------------------------------|----|
| 1  |                     | name of intended registry                                                       |    |
| 2  |                     |                                                                                 |    |
| 3  |                     |                                                                                 |    |
| 4  | Trial registration: | <a href="#">#2b</a> All items from the World Health Organization Trial          | 2  |
| 5  |                     |                                                                                 |    |
| 6  | data set            | Registration Data Set                                                           |    |
| 7  |                     |                                                                                 |    |
| 8  |                     |                                                                                 |    |
| 9  | Protocol version    | <a href="#">#3</a> Date and version identifier                                  | 4  |
| 10 |                     |                                                                                 |    |
| 11 |                     |                                                                                 |    |
| 12 | Funding             | <a href="#">#4</a> Sources and types of financial, material, and other          | 11 |
| 13 |                     |                                                                                 |    |
| 14 |                     | support                                                                         |    |
| 15 |                     |                                                                                 |    |
| 16 |                     |                                                                                 |    |
| 17 | Roles and           | <a href="#">#5a</a> Names, affiliations, and roles of protocol contributors     | 1  |
| 18 |                     |                                                                                 |    |
| 19 | responsibilities:   |                                                                                 |    |
| 20 |                     |                                                                                 |    |
| 21 | contributorship     |                                                                                 |    |
| 22 |                     |                                                                                 |    |
| 23 |                     |                                                                                 |    |
| 24 |                     |                                                                                 |    |
| 25 | Roles and           | <a href="#">#5b</a> Name and contact information for the trial sponsor          | 11 |
| 26 |                     |                                                                                 |    |
| 27 | responsibilities:   |                                                                                 |    |
| 28 |                     |                                                                                 |    |
| 29 | sponsor contact     |                                                                                 |    |
| 30 |                     |                                                                                 |    |
| 31 | information         |                                                                                 |    |
| 32 |                     |                                                                                 |    |
| 33 |                     |                                                                                 |    |
| 34 |                     |                                                                                 |    |
| 35 | Roles and           | <a href="#">#5c</a> Role of study sponsor and funders, if any, in study design; | 11 |
| 36 |                     |                                                                                 |    |
| 37 | responsibilities:   | collection, management, analysis, and interpretation of                         |    |
| 38 |                     |                                                                                 |    |
| 39 | sponsor and funder  | data; writing of the report; and the decision to submit the                     |    |
| 40 |                     |                                                                                 |    |
| 41 |                     | report for publication, including whether they will have                        |    |
| 42 |                     |                                                                                 |    |
| 43 |                     | ultimate authority over any of these activities                                 |    |
| 44 |                     |                                                                                 |    |
| 45 |                     |                                                                                 |    |
| 46 |                     |                                                                                 |    |
| 47 | Roles and           | <a href="#">#5d</a> Composition, roles, and responsibilities of the             | 11 |
| 48 |                     |                                                                                 |    |
| 49 | responsibilities:   | coordinating centre, steering committee, endpoint                               |    |
| 50 |                     |                                                                                 |    |
| 51 | committees          | adjudication committee, data management team, and                               |    |
| 52 |                     |                                                                                 |    |
| 53 |                     | other individuals or groups overseeing the trial, if                            |    |
| 54 |                     |                                                                                 |    |
| 55 |                     | applicable (see Item 21a for data monitoring committee)                         |    |
| 56 |                     |                                                                                 |    |
| 57 |                     |                                                                                 |    |
| 58 |                     |                                                                                 |    |
| 59 |                     |                                                                                 |    |
| 60 |                     |                                                                                 |    |

1 **Introduction**  
2

3  
4 **Background and** [#6a](#) Description of research question and justification for 3  
5  
6 rationale undertaking the trial, including summary of relevant  
7 studies (published and unpublished) examining benefits  
8 and harms for each intervention  
9  
10  
11  
12

13  
14 **Background and** [#6b](#) Explanation for choice of comparators 3  
15  
16 rationale: choice of  
17 comparators  
18  
19  
20

21 **Objectives** [#7](#) Specific objectives or hypotheses 3  
22  
23

24 **Trial design** [#8](#) Description of trial design including type of trial (eg, 2  
25 parallel group, crossover, factorial, single group),  
26 allocation ratio, and framework (eg, superiority,  
27 equivalence, non-inferiority, exploratory)  
28  
29  
30  
31  
32  
33

34 **Methods:**

35 **Participants,**  
36  
37 **interventions, and**  
38  
39 **outcomes**  
40  
41  
42  
43

44 **Study setting** [#9](#) Description of study settings (eg, community clinic, 4  
45 academic hospital) and list of countries where data will be  
46 collected. Reference to where list of study sites can be  
47 obtained  
48  
49  
50  
51  
52

53  
54 **Eligibility criteria** [#10](#) Inclusion and exclusion criteria for participants. If 4  
55 applicable, eligibility criteria for study centres and  
56  
57  
58  
59



|    |                      |                                                                                   |     |
|----|----------------------|-----------------------------------------------------------------------------------|-----|
| 1  |                      | individuals who will perform the interventions (eg,                               |     |
| 2  |                      |                                                                                   |     |
| 3  |                      | surgeons, psychotherapists)                                                       |     |
| 4  |                      |                                                                                   |     |
| 5  |                      |                                                                                   |     |
| 6  | Interventions:       | <a href="#">#11a</a> Interventions for each group with sufficient detail to allow | 5-6 |
| 7  |                      |                                                                                   |     |
| 8  | description          | replication, including how and when they will be                                  |     |
| 9  |                      |                                                                                   |     |
| 10 |                      | administered                                                                      |     |
| 11 |                      |                                                                                   |     |
| 12 |                      |                                                                                   |     |
| 13 | Interventions:       | <a href="#">#11b</a> Criteria for discontinuing or modifying allocated            | 5-6 |
| 14 |                      |                                                                                   |     |
| 15 | modifications        | interventions for a given trial participant (eg, drug dose                        |     |
| 16 |                      | change in response to harms, participant request, or                              |     |
| 17 |                      | improving / worsening disease)                                                    |     |
| 18 |                      |                                                                                   |     |
| 19 |                      |                                                                                   |     |
| 20 |                      |                                                                                   |     |
| 21 |                      |                                                                                   |     |
| 22 |                      |                                                                                   |     |
| 23 | Interventions:       | <a href="#">#11c</a> Strategies to improve adherence to intervention protocols,   | 5-6 |
| 24 |                      |                                                                                   |     |
| 25 | adherence            | and any procedures for monitoring adherence (eg, drug                             |     |
| 26 |                      | tablet return; laboratory tests)                                                  |     |
| 27 |                      |                                                                                   |     |
| 28 |                      |                                                                                   |     |
| 29 |                      |                                                                                   |     |
| 30 |                      |                                                                                   |     |
| 31 | Interventions:       | <a href="#">#11d</a> Relevant concomitant care and interventions that are         | 5-6 |
| 32 |                      |                                                                                   |     |
| 33 | concomitant care     | permitted or prohibited during the trial                                          |     |
| 34 |                      |                                                                                   |     |
| 35 |                      |                                                                                   |     |
| 36 | Outcomes             | <a href="#">#12</a> Primary, secondary, and other outcomes, including the         | 6-7 |
| 37 |                      |                                                                                   |     |
| 38 |                      | specific measurement variable (eg, systolic blood                                 |     |
| 39 |                      | pressure), analysis metric (eg, change from baseline, final                       |     |
| 40 |                      | value, time to event), method of aggregation (eg, median,                         |     |
| 41 |                      | proportion), and time point for each outcome. Explanation                         |     |
| 42 |                      | of the clinical relevance of chosen efficacy and harm                             |     |
| 43 |                      | outcomes is strongly recommended                                                  |     |
| 44 |                      |                                                                                   |     |
| 45 |                      |                                                                                   |     |
| 46 |                      |                                                                                   |     |
| 47 |                      |                                                                                   |     |
| 48 |                      |                                                                                   |     |
| 49 |                      |                                                                                   |     |
| 50 |                      |                                                                                   |     |
| 51 |                      |                                                                                   |     |
| 52 |                      |                                                                                   |     |
| 53 | Participant timeline | <a href="#">#13</a> Time schedule of enrolment, interventions (including any      | 6-7 |
| 54 |                      |                                                                                   |     |
| 55 |                      | run-ins and washouts), assessments, and visits for                                |     |
| 56 |                      |                                                                                   |     |
| 57 |                      | participants. A schematic diagram is highly recommended                           |     |
| 58 |                      |                                                                                   |     |
| 59 |                      |                                                                                   |     |
| 60 |                      |                                                                                   |     |

(see Figure)

|    |                           |                      |                                                               |
|----|---------------------------|----------------------|---------------------------------------------------------------|
| 1  |                           |                      |                                                               |
| 2  |                           |                      |                                                               |
| 3  |                           |                      |                                                               |
| 4  | Sample size               | <a href="#">#14</a>  | Estimated number of participants needed to achieve 4          |
| 5  |                           |                      |                                                               |
| 6  |                           |                      | study objectives and how it was determined, including         |
| 7  |                           |                      |                                                               |
| 8  |                           |                      | clinical and statistical assumptions supporting any sample    |
| 9  |                           |                      |                                                               |
| 10 |                           |                      | size calculations                                             |
| 11 |                           |                      |                                                               |
| 12 |                           |                      |                                                               |
| 13 | Recruitment               | <a href="#">#15</a>  | Strategies for achieving adequate participant enrolment to 4  |
| 14 |                           |                      |                                                               |
| 15 |                           |                      |                                                               |
| 16 |                           |                      | reach target sample size                                      |
| 17 |                           |                      |                                                               |
| 18 |                           |                      |                                                               |
| 19 | <b>Methods:</b>           |                      |                                                               |
| 20 |                           |                      |                                                               |
| 21 | <b>Assignment of</b>      |                      |                                                               |
| 22 |                           |                      |                                                               |
| 23 | <b>interventions (for</b> |                      |                                                               |
| 24 |                           |                      |                                                               |
| 25 | <b>controlled trials)</b> |                      |                                                               |
| 26 |                           |                      |                                                               |
| 27 |                           |                      |                                                               |
| 28 |                           |                      |                                                               |
| 29 | Allocation: sequence      | <a href="#">#16a</a> | Method of generating the allocation sequence (eg, 4-5         |
| 30 | generation                |                      |                                                               |
| 31 |                           |                      | computer-generated random numbers), and list of any           |
| 32 |                           |                      |                                                               |
| 33 |                           |                      | factors for stratification. To reduce predictability of a     |
| 34 |                           |                      |                                                               |
| 35 |                           |                      | random sequence, details of any planned restriction (eg,      |
| 36 |                           |                      |                                                               |
| 37 |                           |                      | blocking) should be provided in a separate document that      |
| 38 |                           |                      |                                                               |
| 39 |                           |                      | is unavailable to those who enrol participants or assign      |
| 40 |                           |                      |                                                               |
| 41 |                           |                      | interventions                                                 |
| 42 |                           |                      |                                                               |
| 43 |                           |                      |                                                               |
| 44 |                           |                      |                                                               |
| 45 | Allocation                | <a href="#">#16b</a> | Mechanism of implementing the allocation sequence (eg, 4-5    |
| 46 |                           |                      |                                                               |
| 47 | concealment               |                      | central telephone; sequentially numbered, opaque, sealed      |
| 48 |                           |                      |                                                               |
| 49 | mechanism                 |                      | envelopes), describing any steps to conceal the sequence      |
| 50 |                           |                      |                                                               |
| 51 |                           |                      | until interventions are assigned                              |
| 52 |                           |                      |                                                               |
| 53 |                           |                      |                                                               |
| 54 |                           |                      |                                                               |
| 55 | Allocation:               | <a href="#">#16c</a> | Who will generate the allocation sequence, who will enrol 4-5 |
| 56 |                           |                      |                                                               |
| 57 | implementation            |                      | participants, and who will assign participants to             |
| 58 |                           |                      |                                                               |
| 59 |                           |                      |                                                               |
| 60 |                           |                      |                                                               |

|    |                        |                                                                                 |     |
|----|------------------------|---------------------------------------------------------------------------------|-----|
| 1  |                        | interventions                                                                   |     |
| 2  |                        |                                                                                 |     |
| 3  |                        |                                                                                 |     |
| 4  | Blinding (masking)     | <a href="#">#17a</a> Who will be blinded after assignment to interventions (eg, | 4-5 |
| 5  |                        | trial participants, care providers, outcome assessors, data                     |     |
| 6  |                        | analysts), and how                                                              |     |
| 7  |                        |                                                                                 |     |
| 8  |                        |                                                                                 |     |
| 9  |                        |                                                                                 |     |
| 10 |                        |                                                                                 |     |
| 11 | Blinding (masking):    | <a href="#">#17b</a> If blinded, circumstances under which unblinding is        | 4-5 |
| 12 |                        | emergency                                                                       |     |
| 13 |                        | permissible, and procedure for revealing a participant's                        |     |
| 14 | unblinding             | allocated intervention during the trial                                         |     |
| 15 |                        |                                                                                 |     |
| 16 |                        |                                                                                 |     |
| 17 |                        |                                                                                 |     |
| 18 |                        |                                                                                 |     |
| 19 | <b>Methods: Data</b>   |                                                                                 |     |
| 20 |                        |                                                                                 |     |
| 21 | <b>collection,</b>     |                                                                                 |     |
| 22 |                        |                                                                                 |     |
| 23 | <b>management, and</b> |                                                                                 |     |
| 24 |                        |                                                                                 |     |
| 25 | <b>analysis</b>        |                                                                                 |     |
| 26 |                        |                                                                                 |     |
| 27 |                        |                                                                                 |     |
| 28 |                        |                                                                                 |     |
| 29 | Data collection plan   | <a href="#">#18a</a> Plans for assessment and collection of outcome,            | 7   |
| 30 |                        | baseline, and other trial data, including any related                           |     |
| 31 |                        | processes to promote data quality (eg, duplicate                                |     |
| 32 |                        | measurements, training of assessors) and a description of                       |     |
| 33 |                        | study instruments (eg, questionnaires, laboratory tests)                        |     |
| 34 |                        | along with their reliability and validity, if known. Reference                  |     |
| 35 |                        | to where data collection forms can be found, if not in the                      |     |
| 36 |                        | protocol                                                                        |     |
| 37 |                        |                                                                                 |     |
| 38 |                        |                                                                                 |     |
| 39 |                        |                                                                                 |     |
| 40 |                        |                                                                                 |     |
| 41 |                        |                                                                                 |     |
| 42 |                        |                                                                                 |     |
| 43 |                        |                                                                                 |     |
| 44 |                        |                                                                                 |     |
| 45 |                        |                                                                                 |     |
| 46 |                        |                                                                                 |     |
| 47 |                        |                                                                                 |     |
| 48 | Data collection plan:  | <a href="#">#18b</a> Plans to promote participant retention and complete        | 7   |
| 49 | retention              | follow-up, including list of any outcome data to be                             |     |
| 50 |                        | collected for participants who discontinue or deviate from                      |     |
| 51 |                        | intervention protocols                                                          |     |
| 52 |                        |                                                                                 |     |
| 53 |                        |                                                                                 |     |
| 54 |                        |                                                                                 |     |
| 55 |                        |                                                                                 |     |
| 56 |                        |                                                                                 |     |
| 57 |                        |                                                                                 |     |
| 58 | Data management        | <a href="#">#19</a> Plans for data entry, coding, security, and storage,        | 7   |
| 59 |                        |                                                                                 |     |
| 60 |                        |                                                                                 |     |

including any related processes to promote data quality  
(eg, double data entry; range checks for data values).

Reference to where details of data management  
procedures can be found, if not in the protocol

10 Statistics: outcomes [#20a](#) Statistical methods for analysing primary and secondary 8-9

11 outcomes. Reference to where other details of the  
12 statistical analysis plan can be found, if not in the protocol

18 Statistics: additional [#20b](#) Methods for any additional analyses (eg, subgroup and 8-9  
19 analyses adjusted analyses)

23 Statistics: analysis [#20c](#) Definition of analysis population relating to protocol non- 8-9

24 population and adherence (eg, as randomised analysis), and any  
25 missing data statistical methods to handle missing data (eg, multiple  
26 imputation)

### 33 Methods: Monitoring

36 Data monitoring: [#21a](#) Composition of data monitoring committee (DMC); 7

37 formal committee summary of its role and reporting structure; statement of  
38 whether it is independent from the sponsor and  
39 competing interests; and reference to where further  
40 details about its charter can be found, if not in the  
41 protocol. Alternatively, an explanation of why a DMC is  
42 not needed

53 Data monitoring: [#21b](#) Description of any interim analyses and stopping 7

54 interim analysis guidelines, including who will have access to these  
55 interim results and make the final decision to terminate

|    |                      |                                                                                 |            |
|----|----------------------|---------------------------------------------------------------------------------|------------|
| 1  |                      | the trial                                                                       |            |
| 2  |                      |                                                                                 |            |
| 3  |                      |                                                                                 |            |
| 4  | Harms                | <a href="#">#22</a> Plans for collecting, assessing, reporting, and managing    | 7          |
| 5  |                      | solicited and spontaneously reported adverse events and                         |            |
| 6  |                      | other unintended effects of trial interventions or trial                        |            |
| 7  |                      | conduct                                                                         |            |
| 8  |                      |                                                                                 |            |
| 9  |                      |                                                                                 |            |
| 10 |                      |                                                                                 |            |
| 11 |                      |                                                                                 |            |
| 12 |                      |                                                                                 |            |
| 13 | Auditing             | <a href="#">#23</a> Frequency and procedures for auditing trial conduct, if     | 7          |
| 14 |                      | any, and whether the process will be independent from                           |            |
| 15 |                      | investigators and the sponsor                                                   |            |
| 16 |                      |                                                                                 |            |
| 17 |                      |                                                                                 |            |
| 18 |                      |                                                                                 |            |
| 19 |                      |                                                                                 |            |
| 20 |                      |                                                                                 |            |
| 21 | <b>Ethics and</b>    |                                                                                 |            |
| 22 |                      |                                                                                 |            |
| 23 | <b>dissemination</b> |                                                                                 |            |
| 24 |                      |                                                                                 |            |
| 25 |                      |                                                                                 |            |
| 26 | Research ethics      | <a href="#">#24</a> Plans for seeking research ethics committee / institutional | 10         |
| 27 |                      | review board (REC / IRB) approval                                               |            |
| 28 | approval             |                                                                                 |            |
| 29 |                      |                                                                                 |            |
| 30 |                      |                                                                                 |            |
| 31 | Protocol             | <a href="#">#25</a> Plans for communicating important protocol modifications    | 10         |
| 32 |                      | (eg, changes to eligibility criteria, outcomes, analyses) to                    |            |
| 33 | amendments           | relevant parties (eg, investigators, REC / IRBs, trial                          |            |
| 34 |                      | participants, trial registries, journals, regulators)                           |            |
| 35 |                      |                                                                                 |            |
| 36 |                      |                                                                                 |            |
| 37 |                      |                                                                                 |            |
| 38 |                      |                                                                                 |            |
| 39 |                      |                                                                                 |            |
| 40 |                      |                                                                                 |            |
| 41 | Consent or assent    | <a href="#">#26a</a> Who will obtain informed consent or assent from potential  | 10         |
| 42 |                      | trial participants or authorised surrogates, and how (see                       |            |
| 43 |                      | Item 32)                                                                        |            |
| 44 |                      |                                                                                 |            |
| 45 |                      |                                                                                 |            |
| 46 |                      |                                                                                 |            |
| 47 |                      |                                                                                 |            |
| 48 |                      |                                                                                 |            |
| 49 | Consent or assent:   | <a href="#">#26b</a> Additional consent provisions for collection and use of    | Not        |
| 50 |                      | participant data and biological specimens in ancillary                          |            |
| 51 | ancillary studies    | studies, if applicable                                                          | applicable |
| 52 |                      |                                                                                 |            |
| 53 |                      |                                                                                 |            |
| 54 |                      |                                                                                 |            |
| 55 |                      |                                                                                 |            |
| 56 |                      |                                                                                 |            |
| 57 | Confidentiality      | <a href="#">#27</a> How personal information about potential and enrolled       | 7          |
| 58 |                      |                                                                                 |            |
| 59 |                      |                                                                                 |            |
| 60 |                      |                                                                                 |            |

participants will be collected, shared, and maintained in order to protect confidentiality before, during, and after the trial

|    |                       |                      |                                                                |
|----|-----------------------|----------------------|----------------------------------------------------------------|
| 1  |                       |                      |                                                                |
| 2  |                       |                      |                                                                |
| 3  |                       |                      |                                                                |
| 4  |                       |                      |                                                                |
| 5  |                       |                      |                                                                |
| 6  |                       |                      |                                                                |
| 7  |                       |                      |                                                                |
| 8  | Declaration of        | <a href="#">#28</a>  | Financial and other competing interests for principal          |
| 9  |                       |                      |                                                                |
| 10 | interests             |                      | investigators for the overall trial and each study site        |
| 11 |                       |                      |                                                                |
| 12 |                       |                      |                                                                |
| 13 | Data access           | <a href="#">#29</a>  | Statement of who will have access to the final trial           |
| 14 |                       |                      |                                                                |
| 15 |                       |                      | dataset, and disclosure of contractual agreements that         |
| 16 |                       |                      |                                                                |
| 17 |                       |                      | limit such access for investigators                            |
| 18 |                       |                      |                                                                |
| 19 |                       |                      |                                                                |
| 20 |                       |                      |                                                                |
| 21 | Ancillary and post    | <a href="#">#30</a>  | Provisions, if any, for ancillary and post-trial care, and for |
| 22 |                       |                      |                                                                |
| 23 | trial care            |                      | compensation to those who suffer harm from trial               |
| 24 |                       |                      |                                                                |
| 25 |                       |                      | participation                                                  |
| 26 |                       |                      |                                                                |
| 27 |                       |                      |                                                                |
| 28 | Dissemination policy: | <a href="#">#31a</a> | Plans for investigators and sponsor to communicate trial       |
| 29 |                       |                      |                                                                |
| 30 | trial results         |                      | results to participants, healthcare professionals, the         |
| 31 |                       |                      |                                                                |
| 32 |                       |                      | public, and other relevant groups (eg, via publication,        |
| 33 |                       |                      |                                                                |
| 34 |                       |                      | reporting in results databases, or other data sharing          |
| 35 |                       |                      |                                                                |
| 36 |                       |                      | arrangements), including any publication restrictions          |
| 37 |                       |                      |                                                                |
| 38 |                       |                      |                                                                |
| 39 |                       |                      |                                                                |
| 40 |                       |                      |                                                                |
| 41 | Dissemination policy: | <a href="#">#31b</a> | Authorship eligibility guidelines and any intended use of      |
| 42 |                       |                      |                                                                |
| 43 | authorship            |                      | professional writers                                           |
| 44 |                       |                      |                                                                |
| 45 |                       |                      |                                                                |
| 46 | Dissemination policy: | <a href="#">#31c</a> | Plans, if any, for granting public access to the full          |
| 47 |                       |                      |                                                                |
| 48 | reproducible          |                      | protocol, participant-level dataset, and statistical code      |
| 49 |                       |                      |                                                                |
| 50 |                       |                      |                                                                |
| 51 | research              |                      |                                                                |
| 52 |                       |                      |                                                                |
| 53 |                       |                      |                                                                |
| 54 | <b>Appendices</b>     |                      |                                                                |
| 55 |                       |                      |                                                                |
| 56 |                       |                      |                                                                |
| 57 | Informed consent      | <a href="#">#32</a>  | Model consent form and other related documentation             |
| 58 |                       |                      |                                                                |
| 59 |                       |                      |                                                                |
| 60 |                       |                      |                                                                |

1 materials given to participants and authorised surrogates  
2  
3  
4 Biological specimens [#33](#) Plans for collection, laboratory evaluation, and storage of Not  
5  
6 biological specimens for genetic or molecular analysis in applicable  
7  
8 the current trial and for future use in ancillary studies, if  
9  
10 applicable  
11  
12

13 None The SPIRIT Explanation and Elaboration paper is distributed under the terms of the Creative  
14 Commons Attribution License CC-BY-NC. This checklist can be completed online using  
15  
16 <https://www.goodreports.org/>, a tool made by the [EQUATOR Network](#) in collaboration with  
17  
18 [Penelope.ai](#)  
19  
20  
21  
22  
23  
24  
25  
26  
27  
28  
29  
30  
31  
32  
33  
34  
35  
36  
37  
38  
39  
40  
41  
42  
43  
44  
45  
46  
47  
48  
49  
50  
51  
52  
53  
54  
55  
56  
57  
58  
59  
60
